# Supplementary material for: Non-directed oxidative annulation of 2-arylindazoles with electron deficient olefins via visible light photocatalysis
Source: Royal Society of Chemistry journal article supplement (doi:10.1039/d4cc03657c), 2024-01-01
Supplement: d4cc03657c1.pdf [file d4cc03657c1.pdf]

# Non-directed Oxidative Annulation of 2-Arylindazoles with Electron Deficient Olefins *via* Visible Light Photocatalysis

Krishna Kanta Das and Alakananda Hajra\*<sup>a</sup>

<sup>a</sup>Department of Chemistry, Visva-Bharati (A Central University), Santiniketan 731235, India;  
Tel./Fax: +913463 261526; E-mail: [alakananda.hajra@visva-bharati.ac.in](mailto:alakananda.hajra@visva-bharati.ac.in)

## Table of Contents

|     |                                                                      |         |
|-----|----------------------------------------------------------------------|---------|
| 1.  | <b>General Information</b>                                           | S2      |
| 2.  | <b>Light Information</b>                                             | S2      |
| 3.  | <b>Reaction Setup</b>                                                | S2      |
| 4.  | <b>Experimental Procedures</b>                                       | S2-S3   |
| 5.  | <b>Gram-Scale Preparations</b>                                       | S3      |
| 6.  | <b>Synthetic Transformations</b>                                     | S4      |
| 7.  | <b>Structure determination (X-ray crystallographic data for 3ia)</b> | S5-S6   |
| 8.  | <b>Radical Trapping Experiment &amp; Reaction intermediate</b>       | S6- S8  |
| 9.  | <b>Fluorescence quenching studies</b>                                | S8- S10 |
| 10. | <b>Characterization Data for the Synthesized Products</b>            | S10-S19 |
| 11. | <b>References</b>                                                    | S19     |
| 12. | <b>NMR Spectra for the Synthesized Products</b>                      | S20-S76 |

## 1. General Information:

All reagents were purchased from commercial sources and used without further purification. <sup>1</sup>H NMR spectra were determined on 400 MHz spectrometer as solutions in CDCl<sub>3</sub>. Chemical shifts are expressed in parts per million (δ) and the signals were reported as s (singlet), d (doublet), t (triplet), m (multiplet) and coupling constants (*J*) were given in Hz. <sup>13</sup>C{<sup>1</sup>H} NMR spectra were recorded at 100 MHz in CDCl<sub>3</sub> solution. Chemical shifts as internal standard is referenced to CDCl<sub>3</sub> (δ = 7.26 for <sup>1</sup>H and δ = 77.16 for <sup>13</sup>C{<sup>1</sup>H} NMR) for as internal standard. Thin-layer chromatography (TLC) was performed on Merck pre-coated silica gel 60 F254 aluminum sheets with detection under UV light at 254 nm. Chromatographic separations were carried out on silica gel (60-120 mesh or 100–200 mesh). All 2-arylidazoles<sup>1</sup> were prepared by the reported methods. All solvents were dried and distilled before use. Commercially available solvents were freshly distilled before the reaction. All reactions involving moisture sensitive reactants were executed using oven dried glassware. Melting points (M.p.) were determined after recrystallization of solid compounds from a solution of dichloromethane/petroleum ether (1:3).

**2. Light Information:** Kessil 34 W blue LED (Model No. H150-BLUE) was used as a light source for light promoted reactions. Rating of LED: 24VDC 1.5A 34W. Model: H150-BLUE. Range of wavelength: 450-530 nm. Manufacturer: Kessil, 1689 Regatta blvd, Richmond, CA 94804 (www.kessil.com).

**3. Reaction Setup:** The Borosilicate glass tube was used to carry out light-promoted reaction. The reaction tube was kept 7 cm apart from the exposed of Kessil 34 W blue LED. Regular fan was used to keep up the temperature 28 to 30 °C during the reaction. We did not use any filter.

## 4. Experimental Procedures:

### 4.1. Typical Experimental Procedure for 3ba:

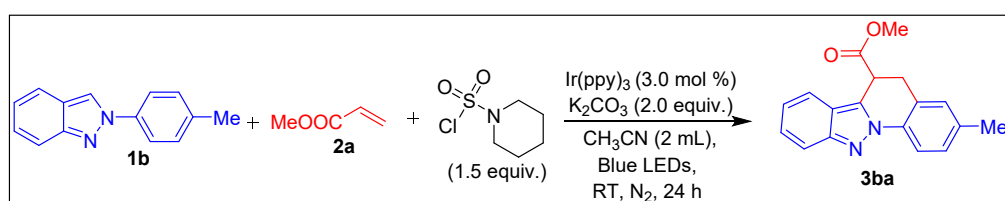

A mixture of 2-(*p*-tolyl)-2*H*-indazole (**1b**) (0.25 mmol, 52.0 mg), Ir(ppy)<sub>3</sub> (3 mol%, 4.9 mg), and K<sub>2</sub>CO<sub>3</sub> (2.0 equiv., 69.1 mg) was taken in an oven dried screw-capped reaction tube. Then the reaction vessel was evacuated and filled with nitrogen for three times. Then methyl acrylate (**2a**) (2.0 equiv., 43.0 mg), piperidine-1-sulfonyl chloride (1.5 equiv., 68.8 mg), and CH<sub>3</sub>CN (2 mL) were added to an oven-dried reaction vessel (tube) equipped with a magnetic stirrer, and the reaction vessel was irradiated with Kessil 34 W blue LED at room temperature under a nitrogen atmosphere for 24 h. The progress of the reaction was monitored by TLC, the reaction was cooled to room temperature and extracted with ethyl acetate. The organic phase was dried over anhydrous Na<sub>2</sub>SO<sub>4</sub>. The crude residue was obtained after evaporating the solvent in vacuum and was purified by column chromatography on silica gel using a mixture of petroleum ether and ethyl acetate.

## 5. Gram-Scale Preparations:

### 5.1. Synthesis of 3ba on 5.0 mmol Scale:

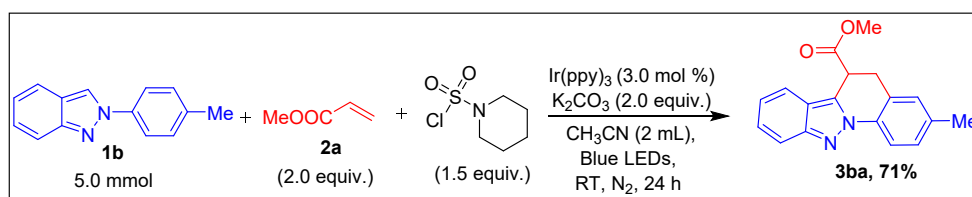

A mixture of 2-(*p*-tolyl)-2*H*-indazole (**1b**) (5.0 mmol, 1.04 g), Ir(ppy)<sub>3</sub> (3 mol%, 98.1 mg), and K<sub>2</sub>CO<sub>3</sub> (2.0 equiv., 1.3 g) was taken in an oven dried reaction vessel. Then the reaction vessel was evacuated and filled with nitrogen for three times. Then methyl acrylate (**2a**) (2.0 equiv., 860 mg), piperidine-1-sulfonyl chloride (1.5 equiv., 1.3 g), and CH<sub>3</sub>CN (20 mL) were added to an oven-dried reaction vessel (round bottom flask) equipped with a magnetic stirrer, and the reaction vessel was irradiated with Kessil 34 W blue LED at room temperature under a nitrogen atmosphere for 24 h. The progress of the reaction was monitored by TLC, the reaction was cooled to room temperature and extracted with ethyl acetate. The organic phase was dried over anhydrous Na<sub>2</sub>SO<sub>4</sub>. The crude residue was obtained after evaporating the solvent in vacuum and was purified by column chromatography on silica gel using a mixture of petroleum ether and ethyl acetate as an eluting solvent to afford the pure product **3ba** (1.03 g, 71%) as a yellow solid.

## 6. Synthetic Transformations:

### 6.1: Transformation of ester group to amide group:<sup>2</sup>

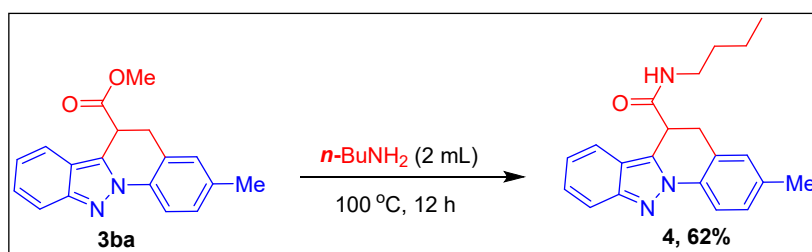

In a flame dried reaction tube methyl 3-methyl-5,6-dihydroindazolo[2,3-a]quinoline-6-carboxylate (**3ba**, 0.2 mmol, 58.4 mg) was added in *n*-BuNH<sub>2</sub> (2 mL) and heated at 100 °C in an oil bath for 12 h. Then the product formation of the reaction was monitored by TLC. After the reaction was completed, the reaction mixture was diluted with ethyl acetate and washed with brine. The organic layer was dried over anhydrous Na<sub>2</sub>SO<sub>4</sub>, concentrated and the crude mixture was purified by a flash column chromatography on silica gel (60-120 mesh) using 18% ethyl acetate in hexane on silica gel to afford the corresponding product **4** (41.3 mg, 62%) as yellowish white solid.

### 6.2: Transformation of ester group to alcohol group:<sup>3</sup>

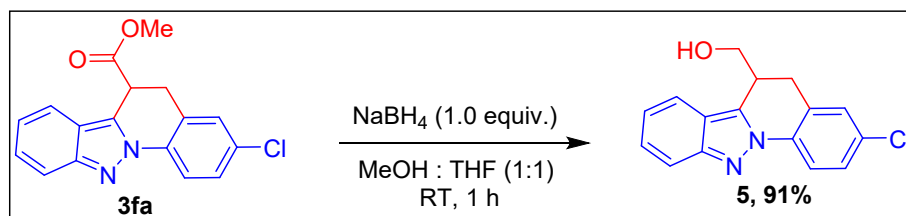

In a flame dried reaction tube methyl 3-chloro-5,6-dihydroindazolo[2,3-a]quinoline-6-carboxylate (**3fa**, 0.2 mmol, 62.5 mg,) and NaBH<sub>4</sub> (1.0 equiv., 7.5 mg) was added in dry solvent MeOH : THF (1:1) (2 mL) at room temperature for 1 h. Then the product formation of the reaction was monitored by TLC. After the reaction was completed, the reaction mixture was evaporating the solvent in vacuum. The reaction mixture was diluted with ethyl acetate and washed with brine. The organic layer was dried over anhydrous Na<sub>2</sub>SO<sub>4</sub>, concentrated and the crude mixture was purified by a flash column chromatography on silica gel (60-120 mesh) using 20% ethyl acetate in hexane on silica gel to afford the corresponding product **5** (51.8 mg, 91%) as brown solid.



## 7. Structure determination (X-ray crystallographic data for **3ia**):

The pale yellow crystal of **3ia** was obtained by crystallization from a solution in dichloromethane/petroleum ether after purification by column chromatography. Chemical Formula:  $C_{17}H_{14}ClN_2O_2$ .

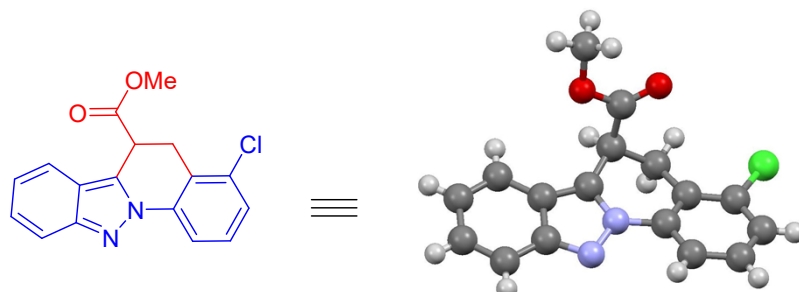

Datablock J\_a - ellipsoid plot

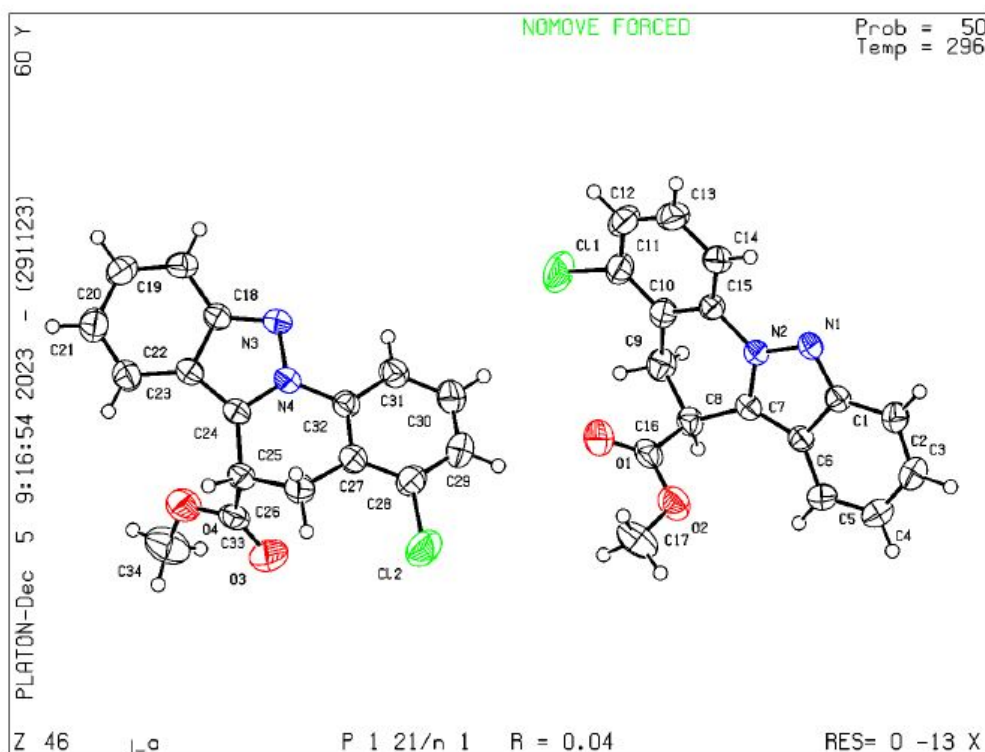

View of ORTEP (with 50% probability) diagram for the structure Methyl 4-chloro-5,6-dihydroindazolo[2,3-a]quinoline-6-carboxylate (**3ia**).

|                             |                                                                 |                  |
|-----------------------------|-----------------------------------------------------------------|------------------|
| <b>Wavelength</b>           | 0.71073 Å                                                       |                  |
| <b>Formula</b>              | C <sub>17</sub> H <sub>14</sub> ClN <sub>2</sub> O <sub>2</sub> |                  |
| <b>Crystal system</b>       | Monoclinic                                                      |                  |
| <b>Space group</b>          | P 1 21/n 1                                                      |                  |
| <b>Unit cell dimensions</b> | a = 11.441(2) Å                                                 | α = 90.0°        |
|                             | b = 13.070(2) Å                                                 | β = 105.086(4) ° |
|                             | c = 20.184(3) Å                                                 | γ = 90.0°        |
| <b>Volume</b>               | 2914.2 Å <sup>3</sup>                                           |                  |
| <b>Z</b>                    | 8                                                               |                  |
| <b>R factor (%)</b>         | 4.49 %                                                          |                  |

The crystallographic data have been deposited with the Cambridge Crystallographic Data centre as a supplementary publication with a CCDC reference number 2345181.

## 8. Radical Trapping Experiment & Reaction intermediate:

### 8.1 Radical Trapping Experiment:

A mixture of 2-(*p*-tolyl)-2*H*-indazole (**1b**) (0.25 mmol, 52.0 mg), Ir(ppy)<sub>3</sub> (3 mol%, 4.9 mg), and K<sub>2</sub>CO<sub>3</sub> (2.0 equiv., 69.1 mg) was taken in an oven dried screw-capped reaction tube. Then the reaction vessel was evacuated and filled with nitrogen for three times. Then methyl acrylate (**2a**) (2.0 equiv., 43.0 mg), piperidine-1-sulfonyl chloride (1.5 equiv., 68.8 mg), DPE (3.0 equiv., 135.1 mg) and CH<sub>3</sub>CN (2 mL) were added to an oven-dried reaction vessel (tube) equipped with a magnetic stirrer, and the reaction vessel was irradiated with Kessil 34 W blue LED at room temperature under a nitrogen atmosphere for 24 h. After that, the reaction mixture was run for HRMS analysis showed that HRMS (ESI-TOF) *m/z*: [M + H]<sup>+</sup> Calcd for [C<sub>19</sub>H<sub>22</sub>NO<sub>2</sub>S]<sup>+</sup>: 328.1366; found: 328.1356, we confirmed that DPE trapped radical adduct was found.

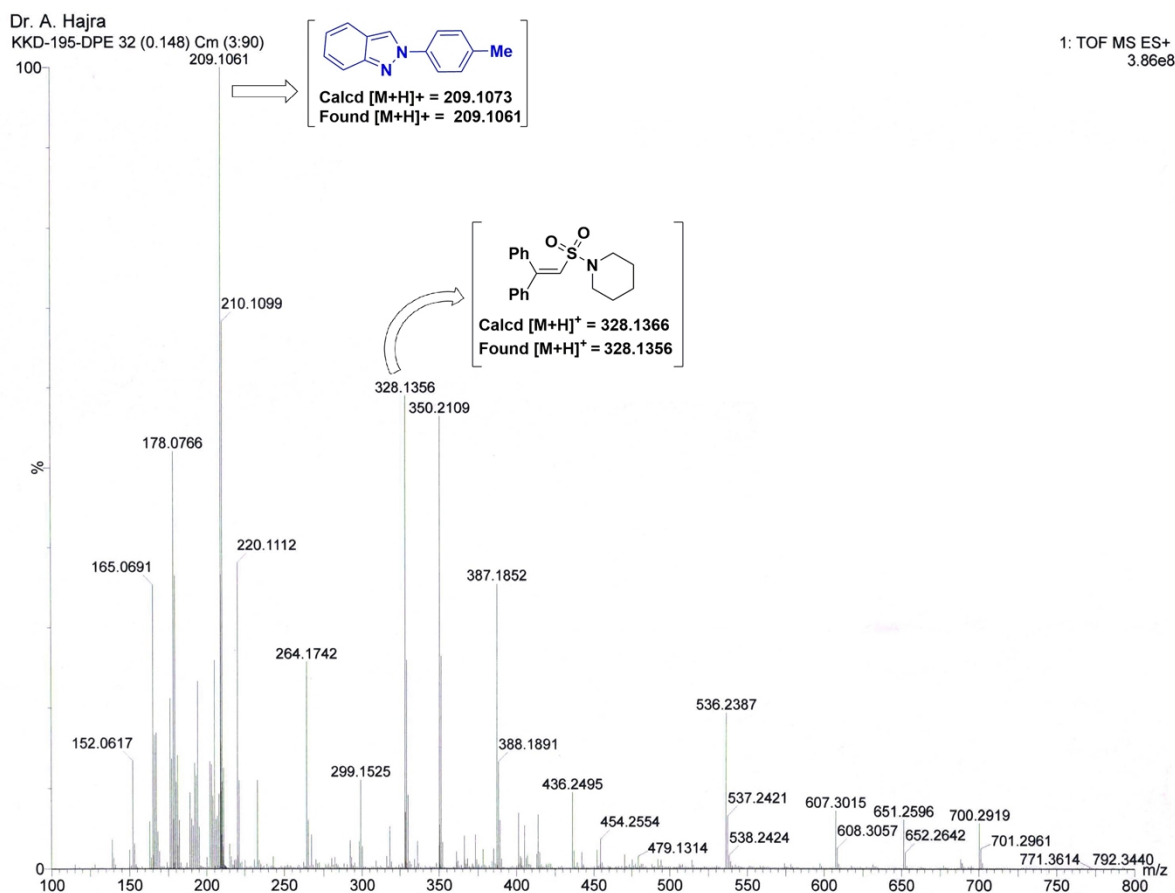

HRMS spectra of DPE adduct

## 8.2 Reaction intermediate detected by HRMS:

A mixture of 2-(*p*-tolyl)-2*H*-indazole (**1b**) (0.25 mmol, 52.0 mg), Ir(ppy)<sub>3</sub> (3 mol%, 4.9 mg), and K<sub>2</sub>CO<sub>3</sub> (2.0 equiv., 69.1 mg) was taken in an oven dried screw-capped reaction tube. Then the reaction vessel was evacuated and filled with nitrogen for three times. Then methyl acrylate (**2a**) (2.0 equiv., 43.0 mg), piperidine-1-sulfonyl chloride (1.5 equiv., 68.8 mg) and CH<sub>3</sub>CN (2 mL) were added to an oven-dried reaction vessel (tube) equipped with a magnetic stirrer, and the reaction vessel was irradiated with Kessil 34 W blue LED at room temperature under a nitrogen atmosphere for 5 h. After that, the reaction mixture was run for HRMS analysis shows the possible involvement of intermediate (**F**) in the reaction pathway. HRMS (ESI-TOF) *m/z*: [M + H]<sup>+</sup> Calcd for [C<sub>23</sub>H<sub>28</sub>N<sub>3</sub>O<sub>4</sub>S]<sup>+</sup>: 442.1795; found: 442.1794, we confirmed that reaction intermediate (**F**) was formed.

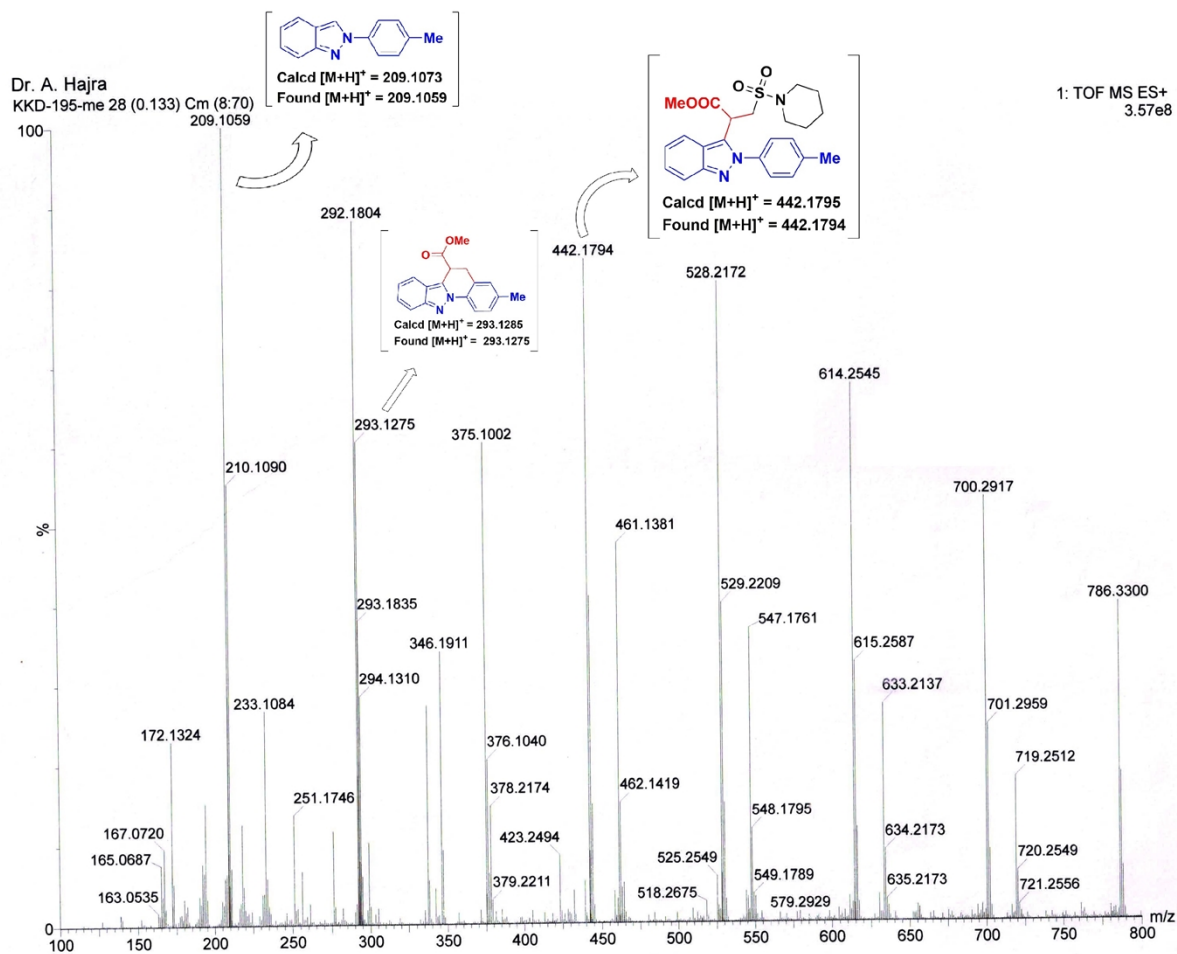

HRMS spectra of intermediate (F)

## 9. Fluorescence Quenching Studies:<sup>4</sup>

$1.0 \times 10^{-5}$  M Ir(ppy)<sub>3</sub> solution was prepared in CH<sub>3</sub>CN for Photoluminescence studies where as other substrates like a) 2-(*p*-tolyl)-2*H*-indazole (**1b**), b) piperidine-1-sulfonyl chloride and c) methyl acrylate (**2a**) in CH<sub>3</sub>CN have been made maintaining  $1.0 \times 10^{-2}$  M concentration.

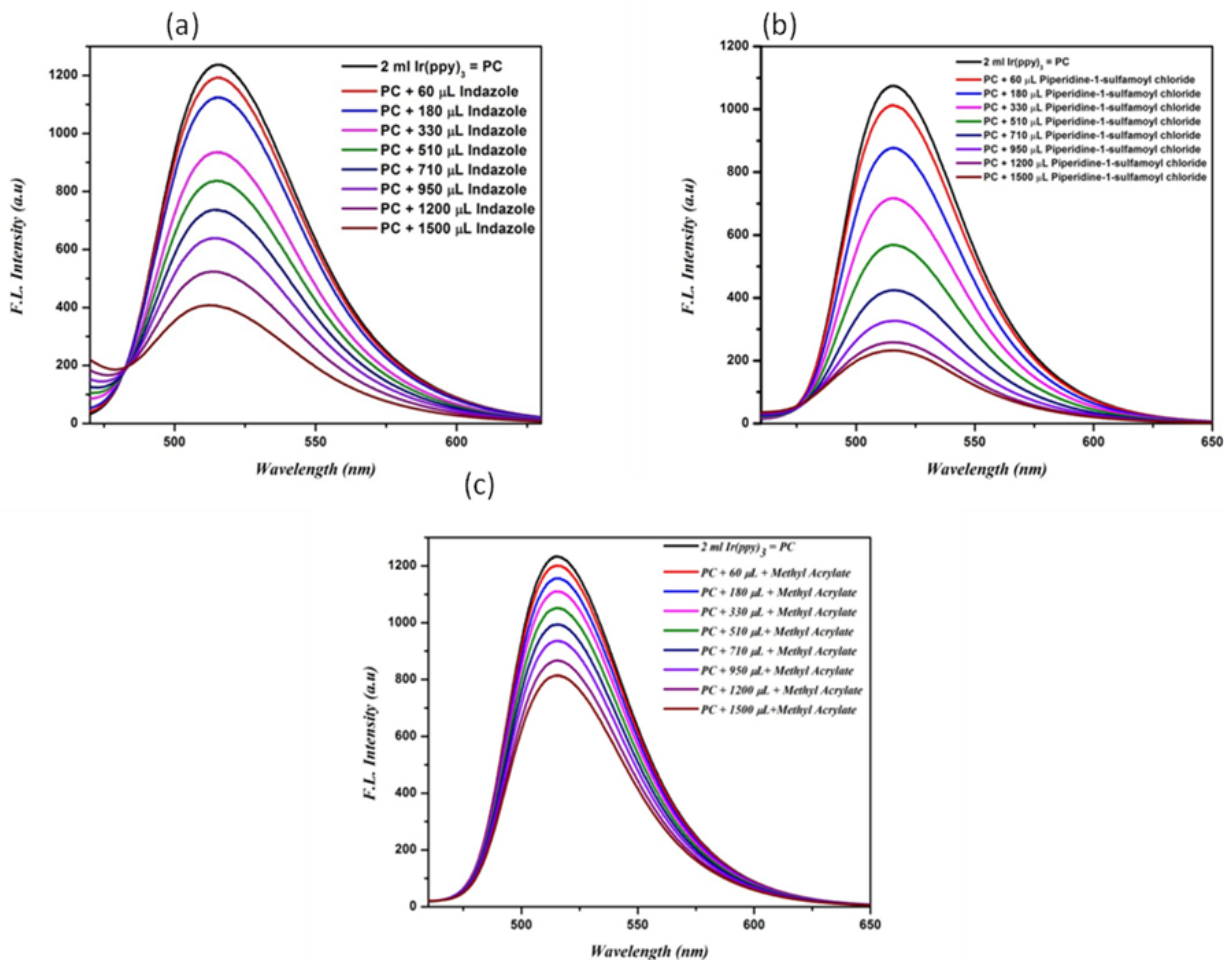

**Fig (S1):** Change in Fluorescence intensity of Ir(ppy)<sub>3</sub> ( $1.0 \times 10^{-5}$  M in CH<sub>3</sub>CN) upon incremental addition of a) 2-(*p*-tolyl)-2*H*-indazole (**1b**), b) piperidine-1-sulfonyl chloride and c) methyl acrylate (**2a**). Excitation wavelength = 380 nm.

The quenching phenomena of the photocatalyst in presence of different substrates are explained by the Stern-Volmer plot with the help equation (i).

$$(I_0/I) = K_{SV} [Q] + 1 \quad \text{-----(i)}$$

Here,  $I_0$  and  $I$  represent the fluorescence intensity of Ir(ppy)<sub>3</sub> in absence and presence of the quencher respectively,  $K_{SV}$  is Stern-Volmer quenching constant and  $[Q]$  is the concentration of the quencher. If the  $I_0/I$  versus  $[Q]$  plot are linear,  $K_{SV}$  can be estimated accurately. In case of piperidine-1-sulfonyl chloride  $K_{SV}$  value obtained from Stern volmer plot is  $1.98 \times 10^5$  M<sup>-1</sup>. It has been observed that the emission intensity of Ir(ppy)<sub>3</sub>, which is largely quenched by

the gradual addition of piperidine-1-sulfonyl chloride, is moderately affected by the addition of **1b** and slightly affected by the addition of **2a**.

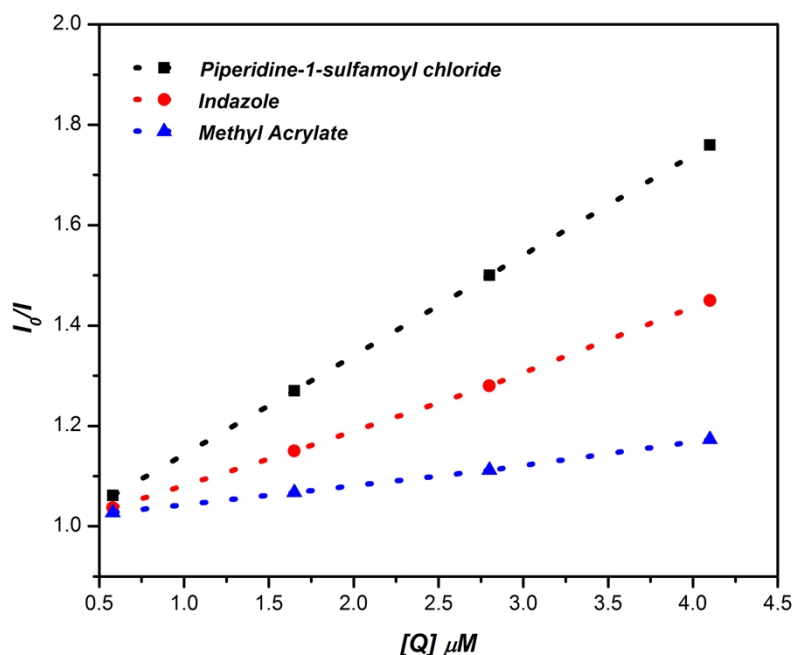

**Fig(S2):** Stern-Volmer plot from the steady state fluorescence emission of Ir(ppy)<sub>3</sub> in presence of quencher in CH<sub>3</sub>CN at 300 K obtained from Fig. (S1).

## 10. Characterization Data for the Synthesized Products:

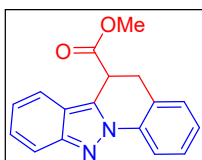

**Methyl 5,6-dihydroindazolo[2,3-a]quinoline-6-carboxylate (3aa):** Yellow solid (71%, 49.3 mg);  $R_f = 0.50$  (PE/EA = 86 : 14), M.p. 92-93 °C; <sup>1</sup>H NMR (400 MHz, CDCl<sub>3</sub>): δ 8.20 (d,  $J = 8.0$  Hz, 1H), 7.76 (d,  $J = 9.2$  Hz, 1H), 7.60 (d,  $J = 8.4$  Hz, 1H), 7.42 (t,  $J = 8.0$  Hz, 1H), 7.37-7.33 (m, 2H), 7.31-7.27 (m, 1H), 7.13-7.09 (m, 1H), 4.52-4.50 (m, 1H), 3.64 (s, 3H), 3.55-3.50 (m, 1H), 3.37-3.31 (m, 1H); <sup>13</sup>C{<sup>1</sup>H} NMR (100 MHz, CDCl<sub>3</sub>): δ 171.0, 149.1, 136.0, 128.8, 128.4, 127.5, 127.4, 127.3, 125.9, 122.5, 120.5, 119.7, 118.0, 117.9, 52.8, 38.0, 28.6; HRMS (ESI-TOF)  $m/z$ :  $[M + H]^+$  Calcd for  $[C_{17}H_{15}N_2O_2]^+$ : 279.1128; found: 279.1110.

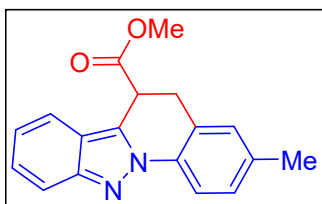

**Methyl 3-methyl-5,6-dihydroindazol[2,3-a]quinoline-6-carboxylate (3ba):** Yellow solid (84%, 61.3 mg);  $R_f = 0.50$  (PE/EA = 85 : 15), M.p. 102-103 °C;  $^1\text{H NMR}$  (400 MHz,  $\text{CDCl}_3$ ):  $\delta$  8.06 (d,  $J = 8.0$  Hz, 1H), 7.75 (d,  $J = 8.8$  Hz, 1H), 7.59 (d,  $J = 8.4$  Hz, 1H), 7.33-7.29 (m, 1H), 7.21 (d,  $J = 8.4$  Hz, 1H), 7.16 (s, 1H), 7.11-7.07 (m, 1H), 4.50-4.47 (m, 1H), 3.64 (s, 3H), 3.49-3.44 (m, 1H), 3.32-3.26 (m, 1H), 2.38 (s, 3H);  $^{13}\text{C}\{^1\text{H}\}$  NMR (100 MHz,  $\text{CDCl}_3$ ):  $\delta$  171.1, 149.1, 137.2, 133.8, 129.4, 128.9, 128.8, 127.1, 125.7, 122.2, 120.5, 119.6, 119.3, 117.8, 52.7, 38.0, 28.6, 21.2; HRMS (ESI-TOF)  $m/z$ :  $[\text{M} + \text{H}]^+$  Calcd for  $[\text{C}_{18}\text{H}_{17}\text{N}_2\text{O}_2]^+$ : 293.1285; found: 293.1290.

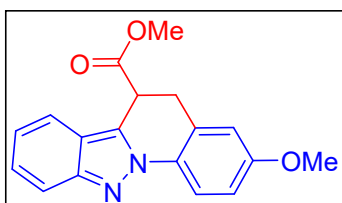

**Methyl 3-methoxy-5,6-dihydroindazol[2,3-a]quinoline-6-carboxylate (3ca):** Yellow solid (54%, 41.6 mg);  $R_f = 0.50$  (PE/EA = 80 : 20), M.p. 106-107 °C;  $^1\text{H NMR}$  (400 MHz,  $\text{CDCl}_3$ ):  $\delta$  8.12 (d,  $J = 8.8$  Hz, 1H), 7.75 (d,  $J = 8.8$  Hz, 1H), 7.60 (d,  $J = 8.4$  Hz, 1H), 7.34-7.30 (m, 1H), 7.12-7.08 (m, 1H), 6.94-6.91 (m, 1H), 6.88 (d,  $J = 2.4$  Hz, 1H), 4.51-4.48 (m, 1H), 3.85 (s, 3H), 3.64 (s, 3H), 3.51-3.46 (m, 1H), 3.34-3.28 (m, 1H);  $^{13}\text{C}\{^1\text{H}\}$  NMR (100 MHz,  $\text{CDCl}_3$ ):  $\delta$  171.0, 158.7, 148.7, 129.6, 127.5, 127.1, 126.6, 122.2, 120.5, 119.5, 119.3, 117.6, 114.4, 113.2, 55.6, 52.8, 37.9, 28.8; HRMS (ESI-TOF)  $m/z$ :  $[\text{M} + \text{H}]^+$  Calcd for  $[\text{C}_{18}\text{H}_{17}\text{N}_2\text{O}_3]^+$ : 309.1234; found: 309.1235.

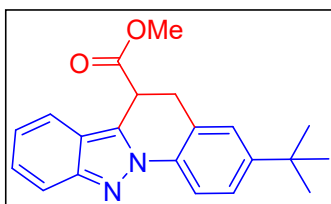

**Methyl 3-(tert-butyl)-5,6-dihydroindazol[2,3-a]quinoline-6-carboxylate (3da):** Yellow solid (92%, 76.8 mg);  $R_f = 0.50$  (PE/EA = 86 : 14), M.p. 109-110 °C;  $^1\text{H NMR}$  (400 MHz,  $\text{CDCl}_3$ ):  $\delta$  8.10 (d,  $J = 8.4$  Hz, 1H), 7.76 (d,  $J = 8.8$  Hz, 1H), 7.59 (d,  $J = 8.4$  Hz, 1H), 7.42 (d,  $J = 8.4$  Hz, 1H), 7.34-7.29 (m, 2H), 7.09 (t,  $J = 8.0$  Hz, 1H), 4.51-4.48 (m, 1H), 3.66 (s, 3H), 3.54-3.49 (m, 1H), 3.35-3.30 (m, 1H), 1.35 (s, 9H);  $^{13}\text{C}\{^1\text{H}\}$  NMR (100 MHz,  $\text{CDCl}_3$ ):  $\delta$  171.2, 150.5, 149.0, 133.7, 127.1, 125.7, 125.4, 125.3, 122.2, 120.5, 119.6, 117.9, 117.7, 117.5, 52.8, 38.1, 34.8, 31.4, 28.8; HRMS (ESI-TOF)  $m/z$ :  $[\text{M} + \text{H}]^+$  Calcd for  $[\text{C}_{21}\text{H}_{23}\text{N}_2\text{O}_2]^+$ : 335.1754; found: 335.1745.

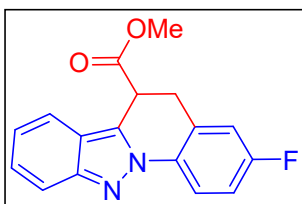

**Methyl 3-fluoro-5,6-dihydroindazolo[2,3-a]quinoline-6-carboxylate (3ea):** Yellow solid (75%, 55.5 mg);  $R_f = 0.50$  (PE/EA = 86 : 14), M.p. 99-100 °C;  $^1\text{H NMR}$  (400 MHz,  $\text{CDCl}_3$ ):  $\delta$  8.18-8.15 (m, 1H), 7.74 (d,  $J = 9.2$  Hz, 1H), 7.61 (d,  $J = 8.8$  Hz, 1H), 7.34-7.30 (m, 1H), 7.13-7.07 (m, 3H), 4.53-4.50 (m, 1H), 3.64 (s, 3H), 3.53-3.48 (m, 1H), 3.35-3.29 (m, 1H);  $^{13}\text{C}\{^1\text{H}\}$  NMR (100 MHz,  $\text{CDCl}_3$ ):  $\delta$  170.7, 161.4 (C-F,  $^1J_{\text{C-F}} = 247.0$  Hz), 149.2, 132.4, 128.2 (C-F,  $^3J_{\text{C-F}} = 9.0$  Hz), 127.4, 126.9, 122.5, 120.6, 119.8 (C-F,  $^3J_{\text{C-F}} = 9.0$  Hz), 119.6, 117.9, 115.8 (C-F,  $^1J_{\text{C-F}} = 23.0$  Hz), 115.1 (C-F,  $^2J_{\text{C-F}} = 22.0$  Hz), 52.9, 37.7, 28.5; HRMS (ESI-TOF)  $m/z$ :  $[\text{M} + \text{H}]^+$  Calcd for  $[\text{C}_{17}\text{H}_{14}\text{FN}_2\text{O}_2]^+$ : 297.1034; found: 297.1017.

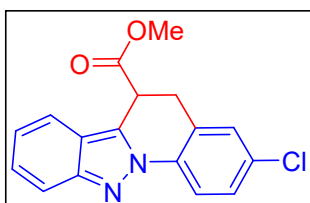

**Methyl 3-chloro-5,6-dihydroindazolo[2,3-a]quinoline-6-carboxylate (3fa):** Yellow solid (73%, 56.9 mg);  $R_f = 0.50$  (PE/EA = 85 : 15), M.p. 113-114 °C;  $^1\text{H NMR}$  (400 MHz,  $\text{CDCl}_3$ ):  $\delta$  8.12 (d,  $J = 8.4$  Hz, 1H), 7.73 (d,  $J = 8.8$  Hz, 1H), 7.60 (d,  $J = 8.4$  Hz, 1H), 7.39-7.35 (m, 2H), 7.33-7.30 (m, 1H), 7.13-7.09 (m, 1H), 4.52-4.50 (m, 1H), 3.64 (s, 3H), 3.51-3.46 (m, 1H), 3.34-3.28 (m, 1H);  $^{13}\text{C}\{^1\text{H}\}$  NMR (100 MHz,  $\text{CDCl}_3$ ):  $\delta$  170.7, 149.4, 134.7, 132.7, 128.8, 128.5, 127.6, 127.5, 127.2, 122.7, 120.7, 119.6, 119.4, 118.0, 52.9, 37.7, 28.3; HRMS (ESI-TOF)  $m/z$ :  $[\text{M} + \text{H}]^+$  Calcd for  $[\text{C}_{17}\text{H}_{14}\text{ClN}_2\text{O}_2]^+$ : 313.0738; found: 313.0747.

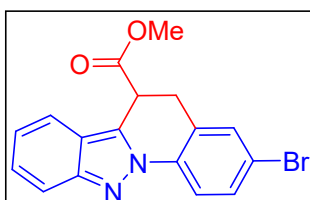

**Methyl 3-bromo-5,6-dihydroindazolo[2,3-a]quinoline-6-carboxylate (3ga):** Yellow solid (51%, 45.5 mg);  $R_f = 0.50$  (PE/EA = 85 : 15), M.p. 125-126 °C;  $^1\text{H NMR}$  (400 MHz,  $\text{CDCl}_3$ ):  $\delta$  8.06 (d,  $J = 8.4$  Hz, 1H), 7.73 (d,  $J = 8.8$  Hz, 1H), 7.60 (d,  $J = 8.8$  Hz, 1H), 7.55-7.51 (m, 2H), 7.34-7.30 (m, 1H), 7.13-7.09 (m, 1H), 4.52-4.49 (m, 1H), 3.65 (s, 3H), 3.52-3.47 (m, 1H), 3.35-3.29 (m, 1H);  $^{13}\text{C}\{^1\text{H}\}$  NMR (100 MHz,  $\text{CDCl}_3$ ):  $\delta$  170.6, 149.4, 135.1, 131.7, 131.5, 127.9, 127.6, 127.2, 122.7, 120.6, 120.7, 120.6, 119.7, 118.0, 52.9, 37.8, 28.3; HRMS (ESI-TOF)  $m/z$ :  $[\text{M} + \text{H}]^+$  Calcd for  $[\text{C}_{17}\text{H}_{14}\text{BrN}_2\text{O}_2]^+$ : 357.0233; found: 357.0241.

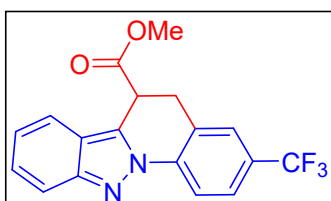



**Methyl 3-(trifluoromethyl)-5,6-dihydroindazolo[2,3-a]quinoline-6-carboxylate (3ha):** Greenish yellow solid (64%, 55.4 mg);  $R_f = 0.50$  (PE/EA = 84 : 16), M.p. 128-129 °C;  $^1\text{H}$  NMR (400 MHz,  $\text{CDCl}_3$ ):  $\delta$  8.30 (d,  $J = 8.4$  Hz, 1H), 7.74 (d,  $J = 8.8$  Hz, 1H), 7.67 (d,  $J = 8.4$  Hz, 1H), 7.62 (d,  $J = 8.4$  Hz, 2H), 7.36-7.32 (m, 1H), 7.14-7.11 (m, 1H), 4.57-4.54 (m, 1H), 3.65 (s, 3H), 3.61-3.56 (m, 1H), 3.41-3.35 (m, 1H);  $^{13}\text{C}\{^1\text{H}\}$  NMR (100 MHz,  $\text{CDCl}_3$ ):  $\delta$  170.5, 149.8, 138.5, 128.7, (q,  $J = 33.0$  Hz), 128.0, 127.8, 126.5, 125.8, (q,  $J = 4.0$  Hz), 123.9 (d,  $J = 270.0$  Hz), 122.5, 120.8, 119.8, 118.3, 118.1, 52.9, 37.6, 28.4; HRMS (ESI-TOF)  $m/z$ :  $[\text{M} + \text{H}]^+$  Calcd for  $[\text{C}_{18}\text{H}_{14}\text{F}_3\text{N}_2\text{O}_2]^+$ : 347.1002; found: 347.0991.

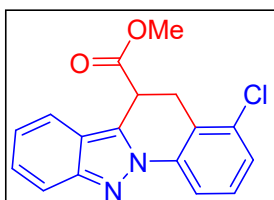

**Methyl 4-chloro-5,6-dihydroindazolo[2,3-a]quinoline-6-carboxylate (3ia):** Yellow solid (81%, 63.3 mg);  $R_f = 0.50$  (PE/EA = 85 : 15), M.p. 121-122 °C;  $^1\text{H}$  NMR (400 MHz,  $\text{CDCl}_3$ ):  $\delta$  8.17-8.13 (m, 1H), 7.73 (d,  $J = 8.4$  Hz, 1H), 7.61 (d,  $J = 8.4$  Hz, 1H), 7.37-7.31 (m, 3H), 7.13-7.09 (m, 1H), 4.56-4.53 (m, 1H), 3.86-3.81 (m, 1H), 3.67 (s, 3H), 3.29-3.23 (m, 1H);  $^{13}\text{C}\{^1\text{H}\}$  NMR (100 MHz,  $\text{CDCl}_3$ ):  $\delta$  170.7, 149.6, 137.2, 133.9, 128.7, 128.0, 127.7, 127.2, 124.4, 122.7, 120.5, 119.7, 118.0, 116.7, 52.9, 37.4, 25.7; HRMS (ESI-TOF)  $m/z$ :  $[\text{M} + \text{H}]^+$  Calcd for  $[\text{C}_{17}\text{H}_{14}\text{ClN}_2\text{O}_2]^+$ : 313.0738; found: 313.0727.

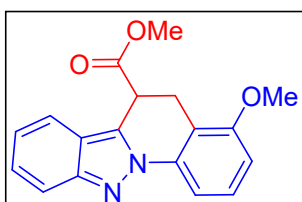

**Methyl 4-methoxy-5,6-dihydroindazolo[2,3-a]quinoline-6-carboxylate (3ja):** Yellow solid (77%, 59.3 mg);  $R_f = 0.50$  (PE/EA = 80 : 20), M.p. 110-111 °C;  $^1\text{H}$  NMR (400 MHz,  $\text{CDCl}_3$ ):  $\delta$  7.85 (d,  $J = 8.0$  Hz, 1H), 7.77-7.74 (m, 1H), 7.60 (d,  $J = 8.4$  Hz, 1H), 7.38-7.29 (m, 2H), 7.12-7.07 (m, 1H), 6.85 (d,  $J = 8.4$  Hz, 1H), 4.51-4.48 (m, 1H), 3.91 (s, 3H), 3.73-3.68 (m, 1H), 3.65 (s, 3H), 3.16-3.10 (m, 1H);  $^{13}\text{C}\{^1\text{H}\}$  NMR (100 MHz,  $\text{CDCl}_3$ ):  $\delta$  171.3, 157.0, 149.1, 136.7, 128.4, 127.3, 122.3, 120.4, 119.7, 117.9, 114.5, 110.5, 109.3, 103.0, 56.0, 52.8, 37.6, 21.6; HRMS (ESI-TOF)  $m/z$ :  $[\text{M} + \text{H}]^+$  Calcd for  $[\text{C}_{18}\text{H}_{17}\text{N}_2\text{O}_3]^+$ : 309.1234; found: 309.1214.

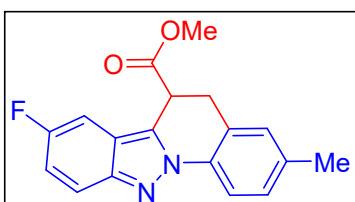

**Methyl 8-fluoro-3-methyl-5,6-dihydroindazolo[2,3-a]quinoline-6-carboxylate (3ka):** Brown solid (85%, 65.9 mg);  $R_f = 0.50$  (PE/EA = 84 : 16), M.p. 112-113 °C;  $^1\text{H}$  NMR (400 MHz,  $\text{CDCl}_3$ ):  $\delta$  8.02 (d,  $J = 8.0$  Hz, 1H), 7.73-7.70 (m, 1H), 7.21-7.15 (m, 3H), 7.13-7.08 (m, 1H), 4.43-4.40 (m, 1H), 3.65 (s, 3H), 3.49-3.44 (m, 1H), 3.31-3.26 (m, 1H), 2.38 (s, 3H);  $^{13}\text{C}\{^1\text{H}\}$  NMR (100 MHz,  $\text{CDCl}_3$ ):  $\delta$  170.9, 158.6 (C-F,  $^1J_{\text{C-F}} = 239.0$  Hz), 146.5, 137.4, 133.7, 129.4,

129.0, 127.2 (C-F,  $^3J_{\text{C-F}} = 9.0$  Hz), 125.7, 120.1 (C-F,  $^3J_{\text{C-F}} = 9.0$  Hz), 119.8, 118.6 (C-F,  $^2J_{\text{C-F}} = 28.0$  Hz), 117.7, 102.2 (C-F,  $^2J_{\text{C-F}} = 25.0$  Hz), 52.8, 37.9, 28.5, 21.2; HRMS (ESI-TOF)  $m/z$ :  $[\text{M} + \text{H}]^+$  Calcd for  $[\text{C}_{18}\text{H}_{16}\text{FN}_2\text{O}_2]^+$ : 311.1190; found: 311.1188.

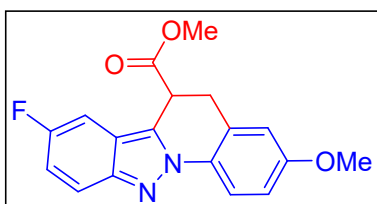

**Methyl 8-fluoro-3-methoxy-5,6-dihydroindazolo[2,3-a]quinoline-6-carboxylate (3la):** Yellow solid (76%, 62.0 mg);  $R_f = 0.50$  (PE/EA = 81 : 19), M.p. 104-105 °C;  $^1\text{H}$  NMR (400 MHz,  $\text{CDCl}_3$ ):  $\delta$  8.06 (d,  $J = 8.8$  Hz, 1H), 7.72-7.69 (m, 1H), 7.18-7.15 (m, 1H), 7.12-7.07 (m, 1H), 6.93-6.88 (m, 2H), 4.43-4.40 (m, 1H), 3.85 (s, 3H), 3.66 (s, 3H), 3.50-3.45 (m, 1H), 3.33-3.27 (m, 1H);  $^{13}\text{C}\{^1\text{H}\}$  NMR (100 MHz,  $\text{CDCl}_3$ ):  $\delta$  170.9, 158.8, 158.6 (C-F,  $^1J_{\text{C-F}} = 240.0$  Hz), 146.3, 129.7, 127.5, 126.6 (C-F,  $^3J_{\text{C-F}} = 9.0$  Hz), 119.9, 119.8 (C-F,  $^3J_{\text{C-F}} = 10.0$  Hz), 119.2, 118.3 (C-F,  $^2J_{\text{C-F}} = 29.0$  Hz), 114.3, 113.3, 102.1 (C-F,  $^2J_{\text{C-F}} = 24.0$  Hz), 55.6, 52.8, 37.9, 28.7; HRMS (ESI-TOF)  $m/z$ :  $[\text{M} + \text{H}]^+$  Calcd for  $[\text{C}_{18}\text{H}_{16}\text{FN}_2\text{O}_3]^+$ : 327.1139; found: 327.1126.

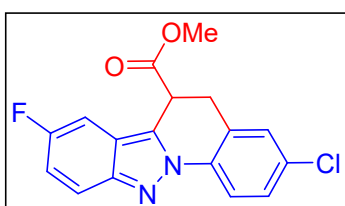

**Methyl 3-chloro-8-fluoro-5,6-dihydroindazolo[2,3-a]quinoline-6-carboxylate (3ma):** White solid (84%, 69.5 mg);  $R_f = 0.50$  (PE/EA = 85 : 15), M.p. 117-118 °C;  $^1\text{H}$  NMR (400 MHz,  $\text{CDCl}_3$ ):  $\delta$  8.08 (d,  $J = 8.4$  Hz, 1H), 7.72-7.68 (m, 1H), 7.38-7.36 (m, 2H), 7.18-7.16 (m, 1H), 7.15-7.10 (m, 1H), 4.45-4.43 (m, 1H), 3.66 (s, 3H), 3.51-3.46 (m, 1H), 3.33-3.28 (m, 1H);  $^{13}\text{C}\{^1\text{H}\}$  NMR (100 MHz,  $\text{CDCl}_3$ ):  $\delta$  170.5, 158.7 (C-F,  $^1J_{\text{C-F}} = 240.0$  Hz), 146.7, 134.5, 132.9, 128.7 (C-F,  $^2J_{\text{C-F}} = 36.0$  Hz), 127.6, 127.3 (C-F,  $^3J_{\text{C-F}} = 9.0$  Hz), 120.1 (C-F,  $^3J_{\text{C-F}} = 9.0$  Hz), 120.0, 119.3, 119.2, 119.1, 102.2 (C-F,  $^2J_{\text{C-F}} = 24.0$  Hz), 53.0, 37.6, 28.2; HRMS (ESI-TOF)  $m/z$ :  $[\text{M} + \text{H}]^+$  Calcd for  $[\text{C}_{17}\text{H}_{13}\text{ClFN}_2\text{O}_2]^+$ : 331.0644; found: 331.0624.

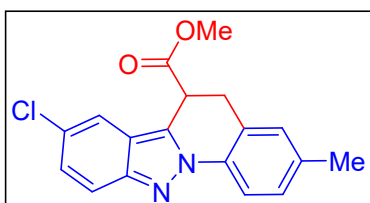

**Methyl 8-chloro-3-methyl-5,6-dihydroindazolo[2,3-a]quinoline-6-carboxylate (3na):** Brown solid (82%, 66.9 mg);  $R_f = 0.50$  (PE/EA = 85 : 15), M.p. 107-108 °C;  $^1\text{H}$  NMR (400 MHz,  $\text{CDCl}_3$ ):  $\delta$  8.02 (d,  $J = 8.0$  Hz, 1H), 7.68 (d,  $J = 8.8$  Hz, 1H), 7.57 (d,  $J = 1.6$  Hz, 1H), 7.24-7.19 (m, 2H), 7.16 (s, 1H), 4.44-4.41 (m, 1H), 3.65 (s, 3H), 3.49-3.44 (m, 1H), 3.31-3.26 (m, 1H), 2.38 (s, 3H);  $^{13}\text{C}\{^1\text{H}\}$  NMR (100 MHz,  $\text{CDCl}_3$ ):  $\delta$  170.8, 147.4, 137.6, 133.6, 129.5, 129.0, 128.4, 127.9, 126.8, 125.7, 121.0, 119.4, 118.4, 117.9, 52.9, 37.9, 28.4, 21.2; HRMS (ESI-TOF)  $m/z$ :  $[\text{M} + \text{H}]^+$  Calcd for  $[\text{C}_{18}\text{H}_{16}\text{ClN}_2\text{O}_2]^+$ : 327.0895; found: 327.0886.

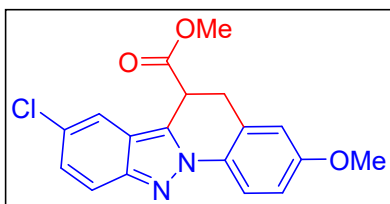

**Methyl 8-chloro-3-methoxy-5,6-dihydroindazolo[2,3-a]quinoline-6-carboxylate (30a):** Yellow solid (61%, 52.1 mg);  $R_f = 0.50$  (PE/EA = 80 : 20), M.p. 150-151 °C;  $^1\text{H NMR}$  (400 MHz,  $\text{CDCl}_3$ ):  $\delta$  8.06 (d,  $J = 8.8$  Hz, 1H), 7.67 (d,  $J = 9.2$  Hz, 1H), 7.57 (d,  $J = 1.6$  Hz, 1H), 7.24-7.21 (m, 1H), 6.93-6.88 (m, 2H), 4.44-4.42 (m, 1H), 3.85 (s, 3H), 3.65 (s, 3H), 3.50-3.45 (m, 1H), 3.33-3.27 (m, 1H);  $^{13}\text{C}\{^1\text{H}\}$  NMR (100 MHz,  $\text{CDCl}_3$ ):  $\delta$  170.7, 158.9, 147.3, 129.6, 128.2, 127.7, 127.5, 126.1, 121.0, 119.3, 118.3, 114.3, 113.3, 55.6, 52.9, 37.8, 28.7; HRMS (ESI-TOF)  $m/z$ :  $[\text{M} + \text{H}]^+$  Calcd for  $[\text{C}_{18}\text{H}_{16}\text{ClN}_2\text{O}_3]^+$ : 343.0844; found: 343.0833.

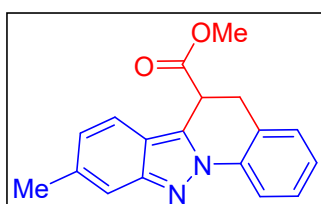

**Methyl 9-methyl-5,6-dihydroindazolo[2,3-a]quinoline-6-carboxylate (3pa):** Yellow solid (89%, 65.0 mg);  $R_f = 0.50$  (PE/EA = 86 : 14), M.p. 76-77 °C;  $^1\text{H NMR}$  (400 MHz,  $\text{CDCl}_3$ ):  $\delta$  8.15 (d,  $J = 8.0$  Hz, 1H), 7.48 (d,  $J = 9.2$  Hz, 2H), 7.39 (t,  $J = 8.0$  Hz, 1H), 7.33 (d,  $J = 7.2$  Hz, 1H), 7.26-7.22 (m, 1H), 6.95-6.93 (m, 1H), 4.48-4.45 (m, 1H), 3.64 (s, 3H), 3.52-3.47 (m, 1H), 3.34-3.29 (m, 1H), 2.45 (s, 3H);  $^{13}\text{C}\{^1\text{H}\}$  NMR (100 MHz,  $\text{CDCl}_3$ ):  $\delta$  171.1, 149.9, 137.3, 136.2, 128.7, 128.3, 127.2, 126.9, 125.7, 125.4, 119.1, 119.0, 117.8, 116.3, 52.7, 38.0, 28.6, 22.45; HRMS (ESI-TOF)  $m/z$ :  $[\text{M} + \text{H}]^+$  Calcd for  $[\text{C}_{18}\text{H}_{17}\text{N}_2\text{O}_2]^+$ : 293.1285; found: 293.1267.

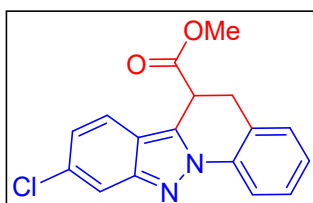

**Methyl 9-chloro-5,6-dihydroindazolo[2,3-a]quinoline-6-carboxylate (3qa):** Brown solid (87%, 68.0 mg);  $R_f = 0.50$  (PE/EA = 85 : 15), M.p. 98-99 °C;  $^1\text{H NMR}$  (400 MHz,  $\text{CDCl}_3$ ):  $\delta$  8.15 (d,  $J = 8.0$  Hz, 1H), 7.73 (d,  $J = 1.2$  Hz, 1H), 7.54 (d,  $J = 9.2$  Hz, 1H), 7.41 (t,  $J = 8.0$  Hz, 1H), 7.35 (d,  $J = 7.2$  Hz, 1H), 7.30-7.25 (m, 1H), 7.06-7.03 (m, 1H), 4.49-4.46 (m, 1H), 3.64 (s, 3H), 3.54-3.49 (m, 1H), 3.36-3.30 (m, 1H);  $^{13}\text{C}\{^1\text{H}\}$  NMR (100 MHz,  $\text{CDCl}_3$ ):  $\delta$  170.7, 149.4, 135.8, 133.1, 128.8, 128.5, 128.0, 127.5, 125.8, 123.9, 121.0, 119.1, 118.0, 116.9, 52.9, 37.9, 28.4; HRMS (ESI-TOF)  $m/z$ :  $[\text{M} + \text{H}]^+$  Calcd for  $[\text{C}_{17}\text{H}_{14}\text{ClN}_2\text{O}_2]^+$ : 313.0738; found: 313.0747.

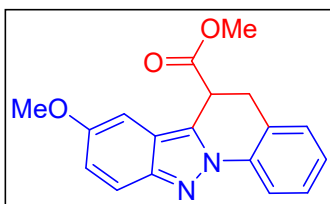

**Methyl 8-methoxy-5,6-dihydroindazolo[2,3-a]quinoline-6-carboxylate (3ra):** Brown solid (73%, 56.2 mg);  $R_f = 0.50$  (PE/EA = 80 : 20), M.p. 103-104 °C;  $^1\text{H NMR}$  (400 MHz,  $\text{CDCl}_3$ ):  $\delta$  8.12 (d,  $J = 8.0$  Hz, 1H), 7.65 (d,  $J = 9.2$  Hz, 1H), 7.39 (t,  $J = 8.0$  Hz, 1H), 7.33 (d,  $J = 7.6$  Hz, 1H), 7.23 (d,  $J = 7.2$  Hz, 1H), 7.03-7.01 (m, 1H), 6.77 (d,  $J = 2.0$  Hz, 1H), 4.46-4.44 (m, 1H), 3.86 (s, 3H), 3.64 (s, 3H), 3.52-3.47 (m, 1H), 3.35-3.30 (m, 1H);  $^{13}\text{C}\{^1\text{H}\}$  NMR (100 MHz,  $\text{CDCl}_3$ ):  $\delta$  171.2, 155.5, 146.2, 136.2, 128.8, 128.3, 126.8, 126.1, 125.6, 122.4, 120.4, 119.4, 117.6, 95.6, 55.5, 52.7, 37.9, 28.7; HRMS (ESI-TOF)  $m/z$ :  $[\text{M} + \text{H}]^+$  Calcd for  $[\text{C}_{18}\text{H}_{17}\text{N}_2\text{O}_3]^+$ : 309.1234; found: 309.1217.

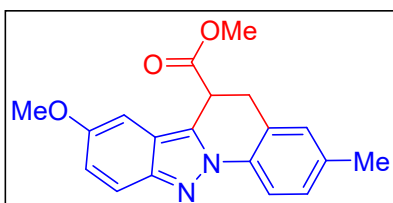

**Methyl 8-methoxy-3-methyl-5,6-dihydroindazolo[2,3-a]quinoline-6-carboxylate (3sa):** Yellow solid (90%, 72.5 mg);  $R_f = 0.50$  (PE/EA = 80 : 20), M.p. 128-129 °C;  $^1\text{H NMR}$  (400 MHz,  $\text{CDCl}_3$ ):  $\delta$  7.99 (d,  $J = 8.4$  Hz, 1H), 7.64 (d,  $J = 9.2$  Hz, 1H), 7.18 (d,  $J = 8.4$  Hz, 1H), 7.13 (s, 1H), 7.02-7.00 (m, 1H), 6.77 (d,  $J = 2.0$  Hz, 1H), 4.44-4.41 (m, 1H), 3.85 (s, 3H), 3.63 (s, 3H), 3.47-3.42 (m, 1H), 3.30-3.25 (m, 1H);  $^{13}\text{C}\{^1\text{H}\}$  NMR (100 MHz,  $\text{CDCl}_3$ ):  $\delta$  171.3, 155.4, 146.0, 136.7, 134.0, 129.3, 128.9, 125.8, 125.5, 122.1, 120.4, 119.3, 117.4, 95.6, 55.4, 52.7, 37.9, 28.7, 21.2; HRMS (ESI-TOF)  $m/z$ :  $[\text{M} + \text{H}]^+$  Calcd for  $[\text{C}_{19}\text{H}_{19}\text{N}_2\text{O}_3]^+$ : 323.1390; found: 323.1388.

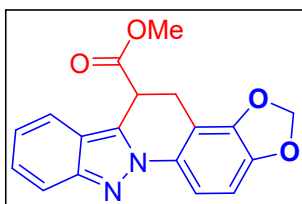

**Methyl 6,7-dihydro-[1,3]dioxolo[4,5-f]indazolo[2,3-a]quinoline-7-carboxylate (3ta):** Greenish yellow solid (83%, 66.9 mg);  $R_f = 0.50$  (PE/EA = 78 : 22), M.p. 123-124 °C;  $^1\text{H NMR}$  (400 MHz,  $\text{CDCl}_3$ ):  $\delta$  7.74-7.70 (m, 2H), 7.58 (d,  $J = 8.0$  Hz, 1H), 7.32-7.28 (m, 1H), 7.11-7.07 (m, 1H), 6.80 (s, 1H), 6.02-6.00 (m, 2H), 4.46-4.43 (m, 1H), 3.64 (s, 3H), 3.43-3.38 (m, 1H), 3.26-3.21 (m, 1H);  $^{13}\text{C}\{^1\text{H}\}$  NMR (100 MHz,  $\text{CDCl}_3$ ):  $\delta$  171.0, 148.8, 147.6, 146.6, 130.5, 127.0, 126.7, 122.3, 120.5, 119.5, 119.3, 117.7, 108.5, 101.8, 100.2, 52.8, 37.9, 28.7; HRMS (ESI-TOF)  $m/z$ :  $[\text{M} + \text{H}]^+$  Calcd for  $[\text{C}_{18}\text{H}_{15}\text{N}_2\text{O}_4]^+$ : 323.1026; found: 323.1022.

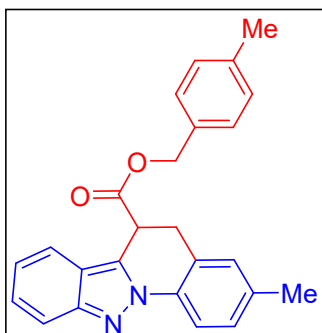

**4-Methylbenzyl 3-methyl-5,6-dihydroindazolo[2,3-a]quinoline-6-carboxylate (3bb):** Yellow solid (94%, 89.9 mg);  $R_f = 0.50$  (PE/EA = 83 : 17), M.p. 96-97 °C;  $^1\text{H NMR}$  (400 MHz,  $\text{CDCl}_3$ ):  $\delta$  8.06 (d,  $J = 8.4$  Hz, 1H), 7.75 (d,  $J = 8.8$  Hz, 1H), 7.55 (d,  $J = 8.4$  Hz, 1H), 7.33-7.29 (m, 1H), 7.21 (d,  $J = 8.4$  Hz, 1H), 7.12 (s, 1H), 7.06 (t,  $J = 8.0$  Hz, 3H), 6.99 (d,  $J = 8.4$  Hz, 2H), 5.06-4.98 (m, 2H), 4.51-4.49 (m, 1H), 3.47-3.41 (m, 1H), 3.32-3.27 (m, 1H), 2.37 (s, 3H), 2.32 (s, 3H);  $^{13}\text{C}\{^1\text{H}\}$  NMR (100 MHz,  $\text{CDCl}_3$ ):  $\delta$  170.4, 149.0, 138.1, 137.2, 133.8, 132.2, 129.4, 129.2, 128.9, 128.1, 127.1, 125.7, 122.2, 120.5, 119.7, 117.88, 117.83, 67.2, 38.3, 28.6, 21.3, 21.2; HRMS (ESI-TOF)  $m/z$ :  $[\text{M} + \text{H}]^+$  Calcd for  $[\text{C}_{25}\text{H}_{23}\text{N}_2\text{O}_2]^+$ : 383.1754; found: 383.1747.

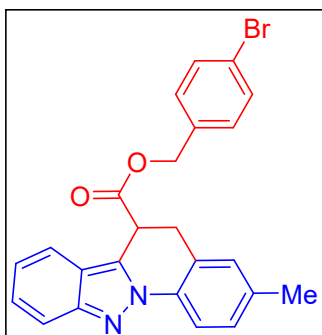

**4-Bromobenzyl 3-methyl-5,6-dihydroindazolo[2,3-a]quinoline-6-carboxylate (3bc):** White solid (76%, 85.0 mg);  $R_f = 0.50$  (PE/EA = 84 : 16), M.p. 112-113 °C;  $^1\text{H NMR}$  (400 MHz,  $\text{CDCl}_3$ ):  $\delta$  8.07 (d,  $J = 8.0$  Hz, 1H), 7.76 (d,  $J = 8.8$  Hz, 1H), 7.55 (d,  $J = 8.4$  Hz, 1H), 7.35-7.30 (m, 3H), 7.22 (d,  $J = 8.4$  Hz, 1H), 7.10-7.06 (m, 2H), 6.89 (d,  $J = 8.4$  Hz, 2H), 5.00-4.93 (m, 2H), 4.53-4.51 (m, 1H), 3.46-3.41 (m, 1H), 3.35-3.29 (m, 1H), 2.38 (s, 3H);  $^{13}\text{C}\{^1\text{H}\}$  NMR (100 MHz,  $\text{CDCl}_3$ ):  $\delta$  170.2, 148.9, 137.4, 134.2, 133.7, 131.6, 129.5, 129.4, 129.0, 127.3, 127.0, 125.6, 122.4, 122.3, 120.5, 119.5, 117.9, 117.8, 66.4, 38.1, 28.6, 21.2; HRMS (ESI-TOF)  $m/z$ :  $[\text{M} + \text{H}]^+$  Calcd for  $[\text{C}_{24}\text{H}_{20}\text{BrN}_2\text{O}_2]^+$ : 447.0703; found: 447.0690.

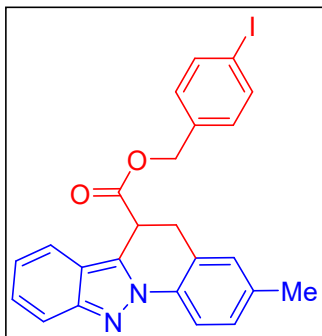

**4-Iodobenzyl 3-methyl-5,6-dihydroindazolo[2,3-a]quinoline-6-carboxylate (3bd):** White solid (96%, 118.6 mg);  $R_f = 0.50$  (PE/EA = 84 : 16), M.p. 124-125 °C;  $^1\text{H NMR}$  (400 MHz,  $\text{CDCl}_3$ ):  $\delta$  8.05 (d,  $J = 8.4$  Hz, 1H), 7.75 (d,  $J = 8.8$  Hz, 1H), 7.56-7.53 (m, 3H), 7.34-7.29 (m, 1H), 7.22 (d,  $J = 8.0$  Hz, 1H), 7.10-7.05 (m, 2H), 6.75 (d,  $J = 8.4$  Hz, 2H), 4.99-4.91 (m, 2H), 4.52-4.50 (m, 1H), 3.45-3.40 (m, 1H), 3.33-3.28 (m, 1H), 2.38 (s, 3H);  $^{13}\text{C}\{^1\text{H}\}$  NMR (100 MHz,  $\text{CDCl}_3$ ):  $\delta$  170.2, 149.0, 137.6, 137.2, 134.8, 133.8, 129.6, 129.4, 129.0, 127.1, 126.8, 125.6, 122.3, 120.5, 119.5, 117.9, 117.8, 94.0, 66.4, 38.1, 28.6, 21.2; HRMS (ESI-TOF)  $m/z$ :  $[\text{M} + \text{H}]^+$  Calcd for  $[\text{C}_{24}\text{H}_{20}\text{IN}_2\text{O}_2]^+$ : 495.0564; found: 495.0551.

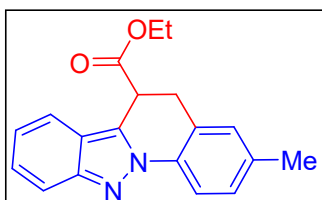

**Ethyl 3-methyl-5,6-dihydroindazolo[2,3-a]quinoline-6-carboxylate (3be):** Gummy liquid (77%, 58.9 mg);  $R_f = 0.50$  (PE/EA = 85 : 15);  $^1\text{H NMR}$  (400 MHz,  $\text{CDCl}_3$ ):  $\delta$  8.06 (d,  $J = 8.0$  Hz, 1H), 7.75 (d,  $J = 8.8$  Hz, 1H), 7.61 (d,  $J = 8.4$  Hz, 1H), 7.33-7.29 (m, 1H), 7.20 (d,  $J = 8.0$  Hz, 1H), 7.16 (s, 3H), 7.11-7.07 (m, 1H), 4.48-4.45 (m, 1H), 4.16-4.02 (m, 2H), 3.48-3.43 (m, 1H), 3.32-3.27 (m, 1H), 2.38 (s, 3H), 1.13 (t,  $J = 7.2$  Hz, 3H);  $^{13}\text{C}\{^1\text{H}\}$  NMR (100 MHz,  $\text{CDCl}_3$ ):  $\delta$  170.6, 149.0, 137.2, 133.8, 129.3, 128.9, 127.3, 127.1, 125.8, 122.2, 120.5, 119.7, 117.85, 117.82, 61.7, 38.2, 28.6, 21.2, 14.1; HRMS (ESI-TOF)  $m/z$ :  $[\text{M} + \text{H}]^+$  Calcd for  $[\text{C}_{19}\text{H}_{19}\text{N}_2\text{O}_2]^+$ : 307.1441; found: 307.1440.

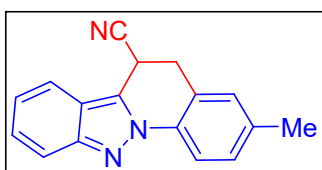

**3-Methyl-5,6-dihydroindazolo[2,3-a]quinoline-6-carbonitrile (3bf):** Brown solid (72%, 46.7 mg);  $R_f = 0.50$  (PE/EA = 83 : 17), M.p. 147-148 °C;  $^1\text{H NMR}$  (400 MHz,  $\text{CDCl}_3$ ):  $\delta$  8.08 (d,  $J = 8.0$  Hz, 1H), 7.85 (d,  $J = 8.4$  Hz, 1H), 7.76 (d,  $J = 8.8$  Hz, 1H), 7.37-7.33 (m, 1H), 7.28 (d,  $J = 8.0$  Hz, 1H), 7.17 (t,  $J = 8.8$  Hz, 2H), 4.62 (t,  $J = 7.6$  Hz, 1H), 3.41 (d,  $J = 7.2$  Hz, 2H), 2.40 (s, 3H);  $^{13}\text{C}\{^1\text{H}\}$  NMR (100 MHz,  $\text{CDCl}_3$ ):  $\delta$  149.2, 137.8, 133.6, 129.9, 129.4, 127.5, 123.6, 123.2, 122.0, 119.8, 119.0, 118.2, 118.1, 117.4, 30.2, 24.9, 21.2; HRMS (ESI-TOF)  $m/z$ :  $[\text{M} + \text{H}]^+$  Calcd for  $[\text{C}_{17}\text{H}_{14}\text{N}_3]^+$ : 260.1182; found: 260.1166.

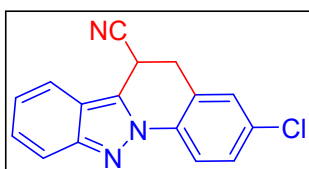

**3-chloro-5,6-dihydroindazolo[2,3-a]quinoline-6-carbonitrile (3fg):** Yellowish white solid (61%, 42.6 mg);  $R_f = 0.50$  (PE/EA = 83 : 17), M.p. 154-155 °C;  $^1\text{H NMR}$  (400 MHz,  $\text{CDCl}_3$ ):  $\delta$  8.10 (d,  $J = 8.4$  Hz, 1H), 7.75 (d,  $J = 8.8$  Hz, 1H), 7.59 (d,  $J = 8.4$  Hz, 1H), 7.44-7.41 (m, 1H), 7.35-7.29 (m, 2H), 7.11-7.08 (m, 1H), 4.64 (t,  $J = 7.6$  Hz, 1H), 3.42 (d,  $J = 7.6$  Hz, 2H);  $^{13}\text{C}\{^1\text{H}\}$  NMR (100 MHz,  $\text{CDCl}_3$ ):  $\delta$  149.3, 133.9, 133.7, 130.1, 129.5, 127.6, 123.8, 123.3, 122.1, 119.9, 199.1, 118.3, 118.2, 117.5, 30.3, 24.9; HRMS (ESI-TOF)  $m/z$ :  $[\text{M} + \text{H}]^+$  Calcd for  $[\text{C}_{16}\text{H}_{11}\text{ClN}_3]^+$ : 280.0636; found: 280.0648.

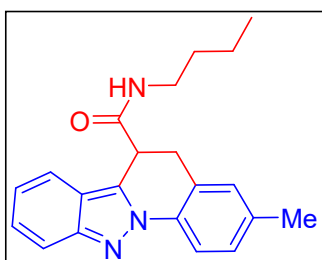

***N*-Butyl-3-methyl-5,6-dihydroindazolo[2,3-*a*]quinoline-6-carboxamide (4):** Yellowish white solid (62%, 51.6 mg);  $R_f = 0.50$  (PE/EA = 76 : 24), M.p. 169-170 °C;  $^1\text{H NMR}$  (400 MHz,  $\text{CDCl}_3$ ):  $\delta$  8.03 (d,  $J = 8.0$  Hz, 1H), 7.768 (d,  $J = 8.8$  Hz, 1H), 7.58 (d,  $J = 8.4$  Hz, 1H), 7.36-7.33 (m, 1H), 7.20 (d,  $J = 8.4$  Hz, 1H), 7.17-7.12 (m, 2H), 5.23 (s, 1H), 4.32-4.29 (m, 1H), 3.70-3.65 (m, 1H), 3.29-3.23 (m, 1H), 3.07-3.02 (m, 2H), 2.37 (s, 3H), 1.20-1.15 (m, 2H), 1.01-0.95 (m, 2H), 0.71 (t,  $J = 7.6$  Hz, 3H);  $^{13}\text{C}\{^1\text{H}\}$  NMR (100 MHz,  $\text{CDCl}_3$ ):  $\delta$  169.4, 149.2, 137.6, 133.7, 129.9, 128.9, 127.9, 127.4, 126.2, 122.9, 120.6, 118.9, 118.2, 117.7, 39.6, 39.1, 31.3, 29.0, 21.2, 19.7, 13.6; HRMS (ESI-TOF)  $m/z$ :  $[\text{M} + \text{H}]^+$  Calcd for  $[\text{C}_{21}\text{H}_{24}\text{N}_3\text{O}]^+$ : 334.1914; found: 334.1900.

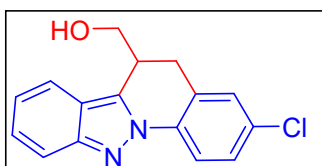

**3-Chloro-5,6-dihydroindazolo[2,3-*a*]quinolin-6-ylmethanol (5):** Brown solid (91%, 64.8 mg);  $R_f = 0.50$  (PE/EA = 74 : 28), M.p. 95-96 °C;  $^1\text{H NMR}$  (400 MHz,  $\text{CDCl}_3$ ):  $\delta$  8.04 (d,  $J = 8.4$  Hz, 1H), 7.67-7.62 (m, 2H), 7.34-7.27 (m, 3H), 7.07-7.04 (m, 1H), 3.83-3.72 (m, 3H), 3.25-3.20 (m, 1H), 3.16-3.12 (m, 1H);  $^{13}\text{C}\{^1\text{H}\}$  NMR (100 MHz,  $\text{CDCl}_3$ ):  $\delta$  149.2, 134.7, 132.5, 131.4, 129.2, 128.26, 128.23, 127.6, 122.3, 120.5, 119.8, 119.1, 117.7, 63.4, 34.9, 27.5; HRMS (ESI-TOF)  $m/z$ :  $[\text{M} + \text{Na}]^+$  Calcd for  $[\text{C}_{16}\text{H}_{13}\text{ClN}_2\text{ONa}]^+$ : 307.0609; found: 307.0609.

## 11. References:

- (1) (a) M. R. Kumar, A. Park, N. Park and S. Lee, *Org. Lett.*, 2011, **13**, 3542–3545; (b) G.; Bogonda, H. Y. Kim and K. Oh, *Org. Lett.*, 2018, **20**, 2711–2715.
- (2) S. Bhattacharjee and A. Hajra, *Org. Lett.*, 2023, **25**, 4183–4187.
- (3) D. S. Nipate, N. Meena, P. N. Swami, K. Rangan and A. Kumar, *Chem. Commun.*, 2024, **60**, 344–347.
- (4) (a) M. J. Cabrera-Afonso, A. Sookezian, S. O. Badir, M. E. Khatib and G. A. Molander, *Chem. Sci.*, 2021, **12**, 9189–9195; (b) A. Sookezian and G. A. Molander, *Org. Lett.*, 2023, **25**, 1014–1019.

## **12. NMR Spectra for the Synthesized Products**



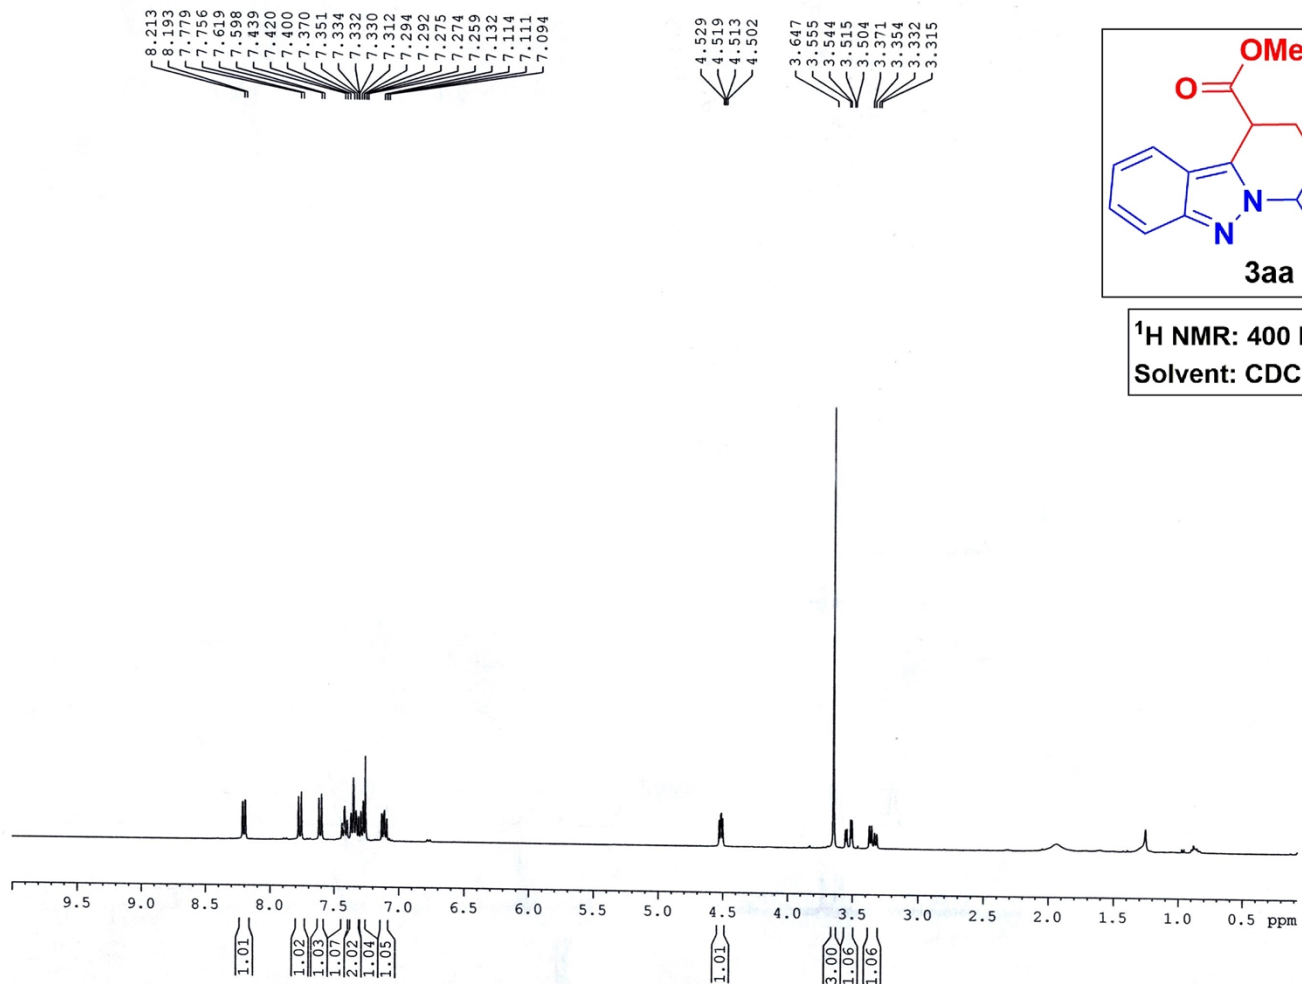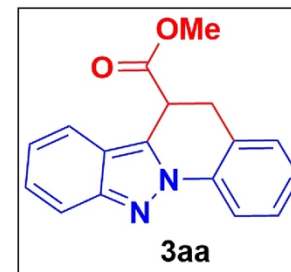

**<sup>1</sup>H NMR: 400 MHz**  
**Solvent: CDCl<sub>3</sub>**

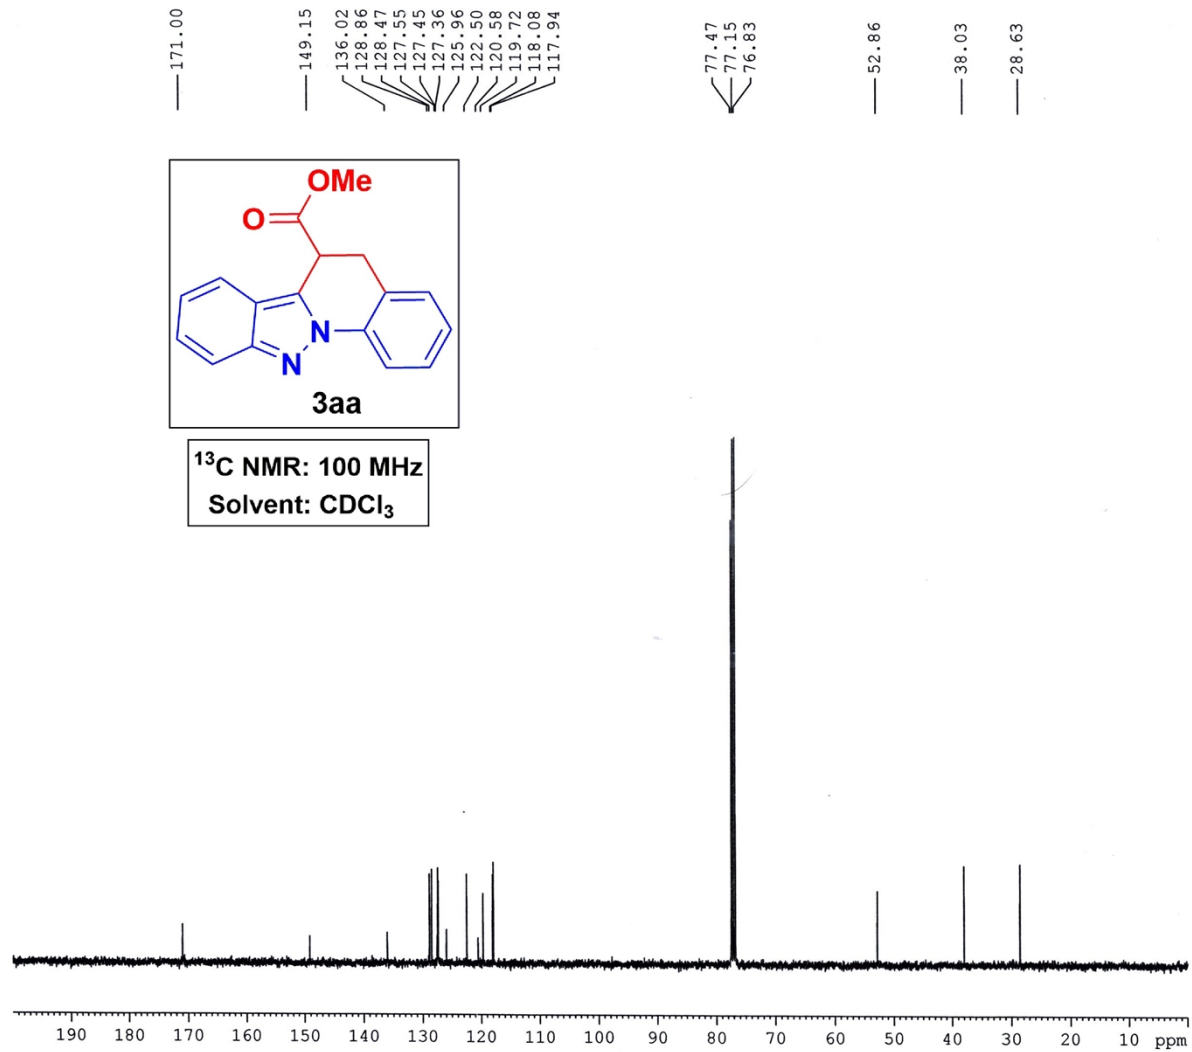

```

Current Data Parameters
NAME      Dr. A HAJRA-2023-13C
EXNO      443
PROCNO    1

F2 - Acquisition Parameters
Date_     20231204
Time      19.52
INSTRUM   spect
PROBHD    5 mm PABBO BB/
PULPROG   zgpg30
TD         32768
SOLVENT   CDCl3
NS         420
DS         2
SWH       24038.461 Hz
FIDRES    0.733596 Hz
AQ        0.6815744 sec
RG        186.42
LW        20.800 usec
DE        6.50 usec
TE        292.5 K
D1        2.00000000 sec
D11       0.03000000 sec
TD0       1

----- CHANNEL f1 -----
SFO1     100.6278588 MHz
NUC1     13C
P1       8.90 usec
PLW1     54.00000000 W

----- CHANNEL f2 -----
SFO2     400.1516006 MHz
NUC2     1H
CPDPRG2  waltz16
PCPD2    90.00 usec
PLW2     12.00000000 W
PLW12    0.32231000 W
PLW13    0.16212000 W

F2 - Processing parameters
SI       16384
SF       100.6177870 MHz
WDW      EM
SSB      0
LB       1.00 Hz
GB       0
PC       1.40
  
```

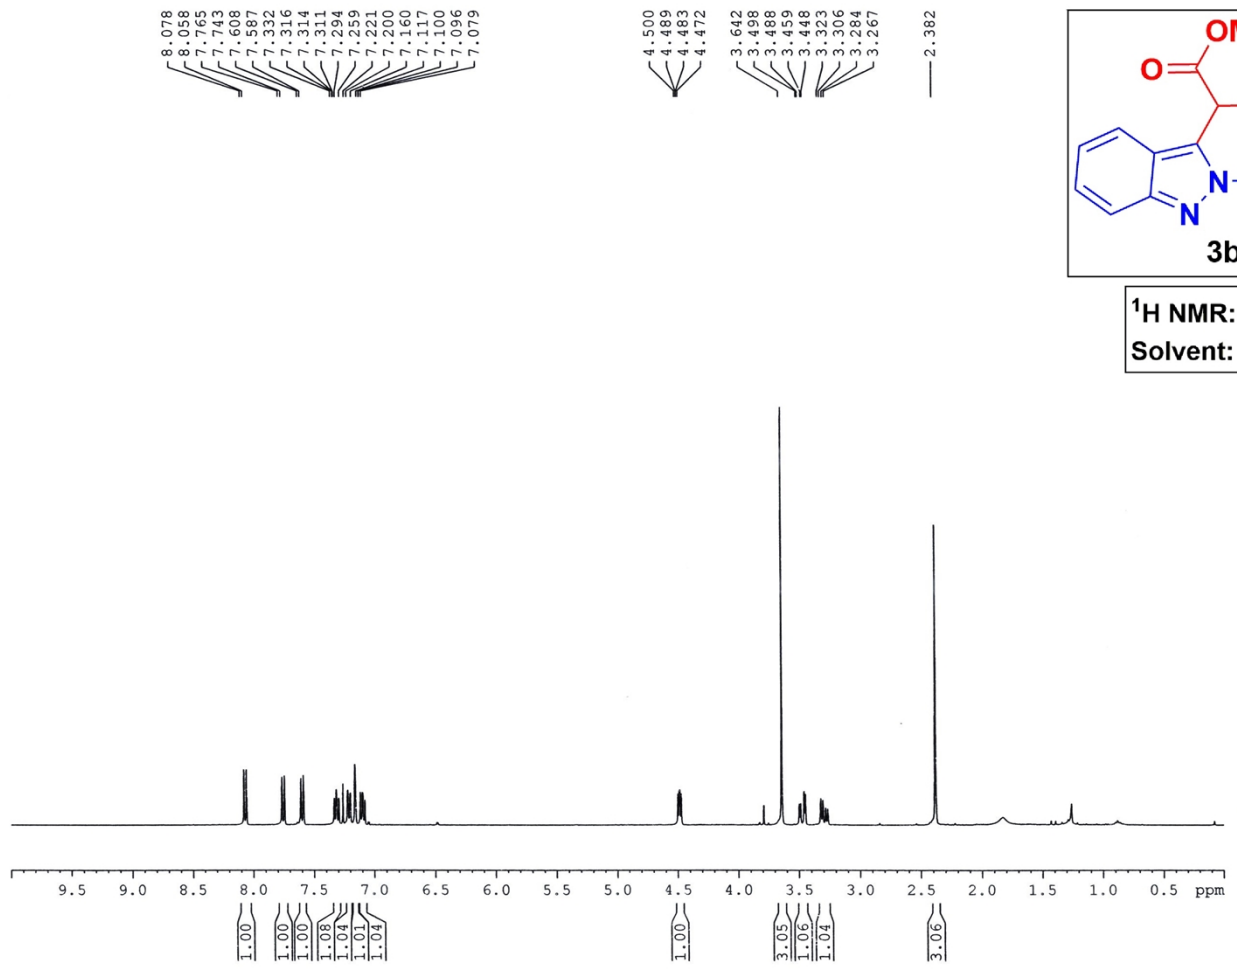

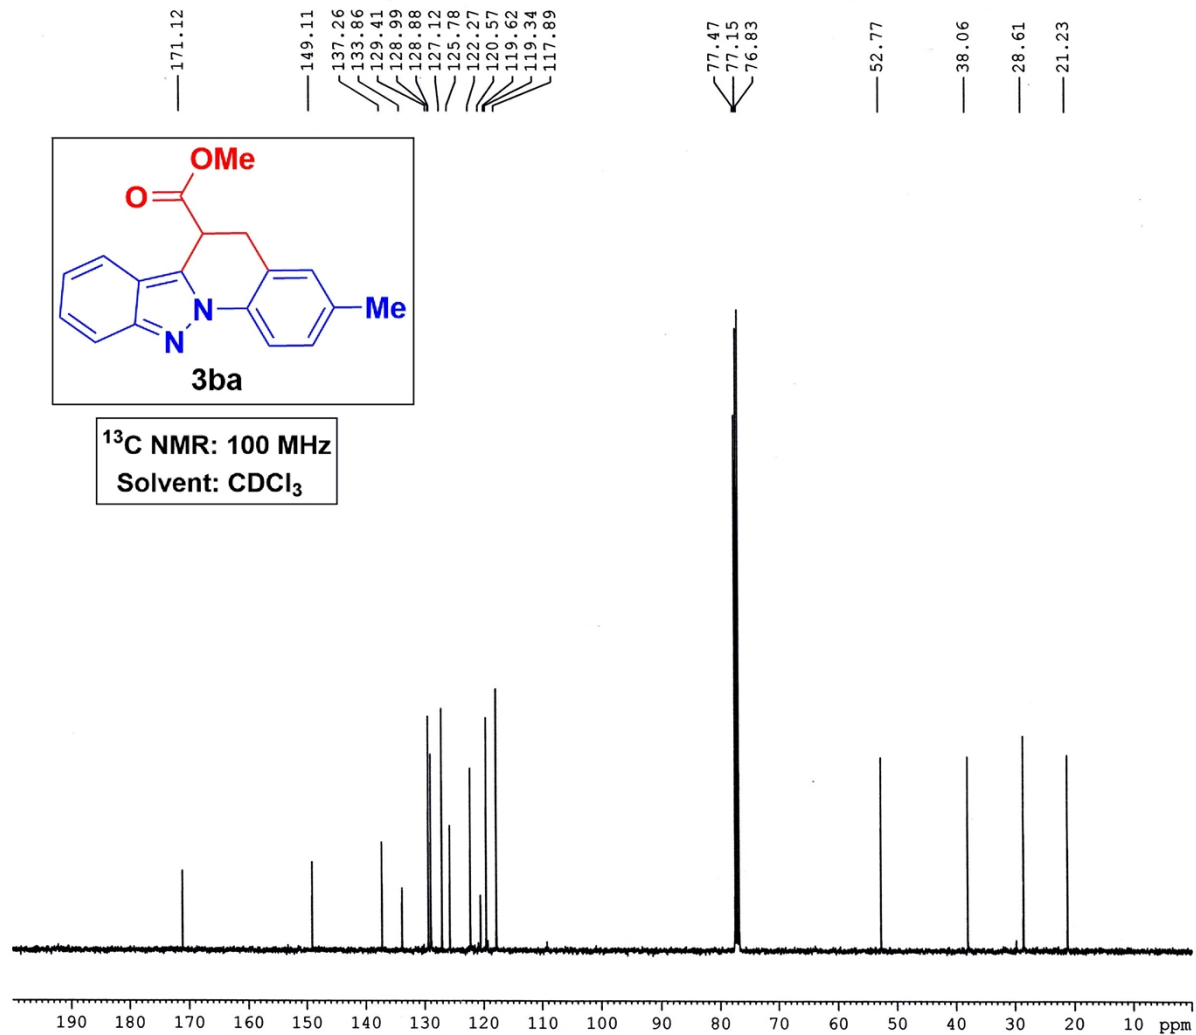

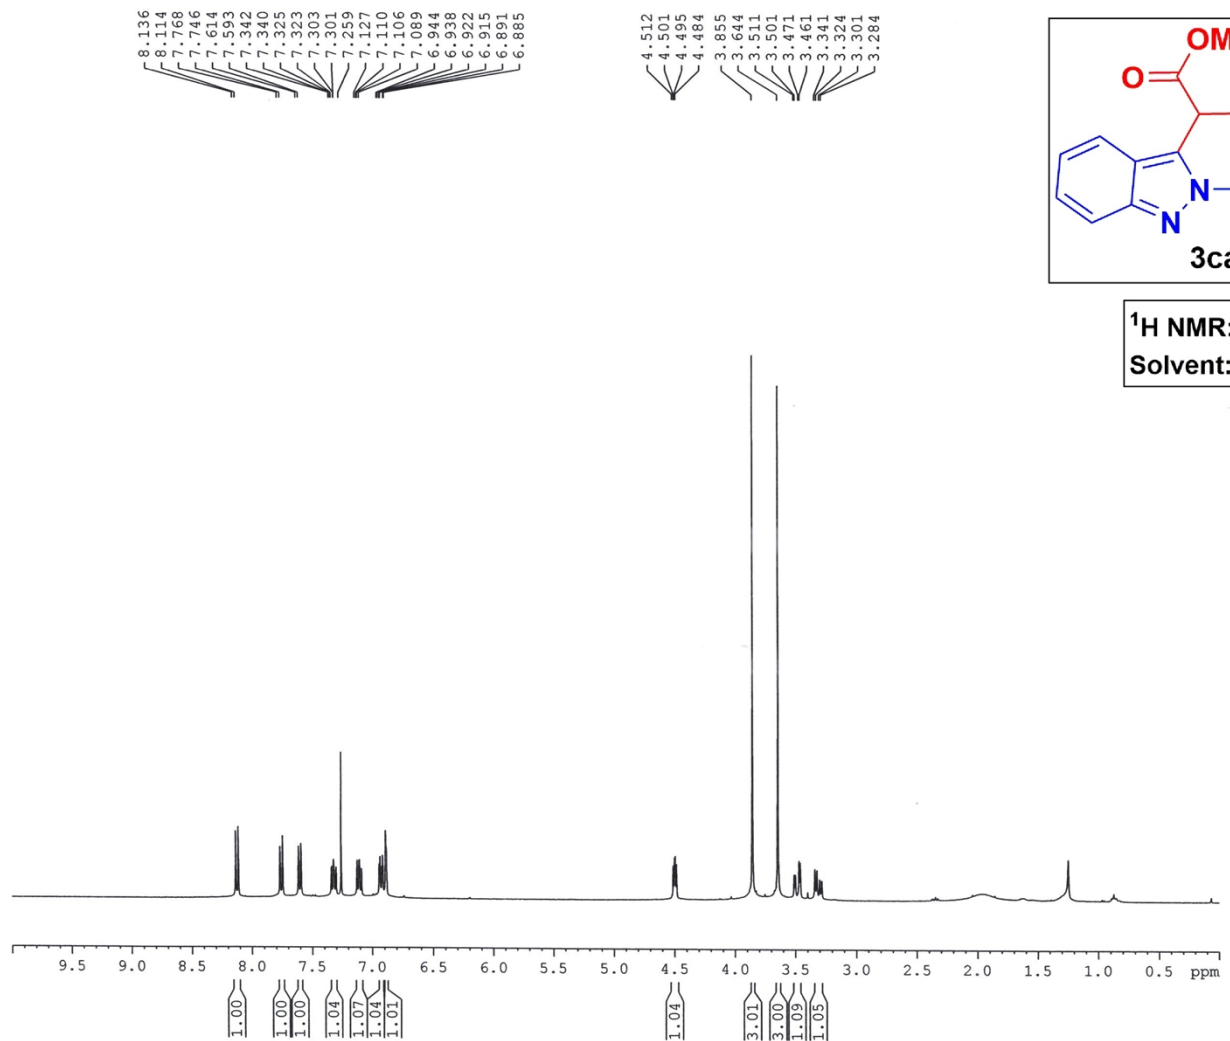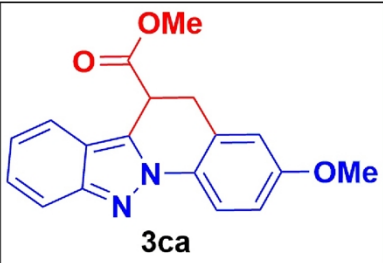

**<sup>1</sup>H NMR: 400 MHz**  
**Solvent: CDCl<sub>3</sub>**

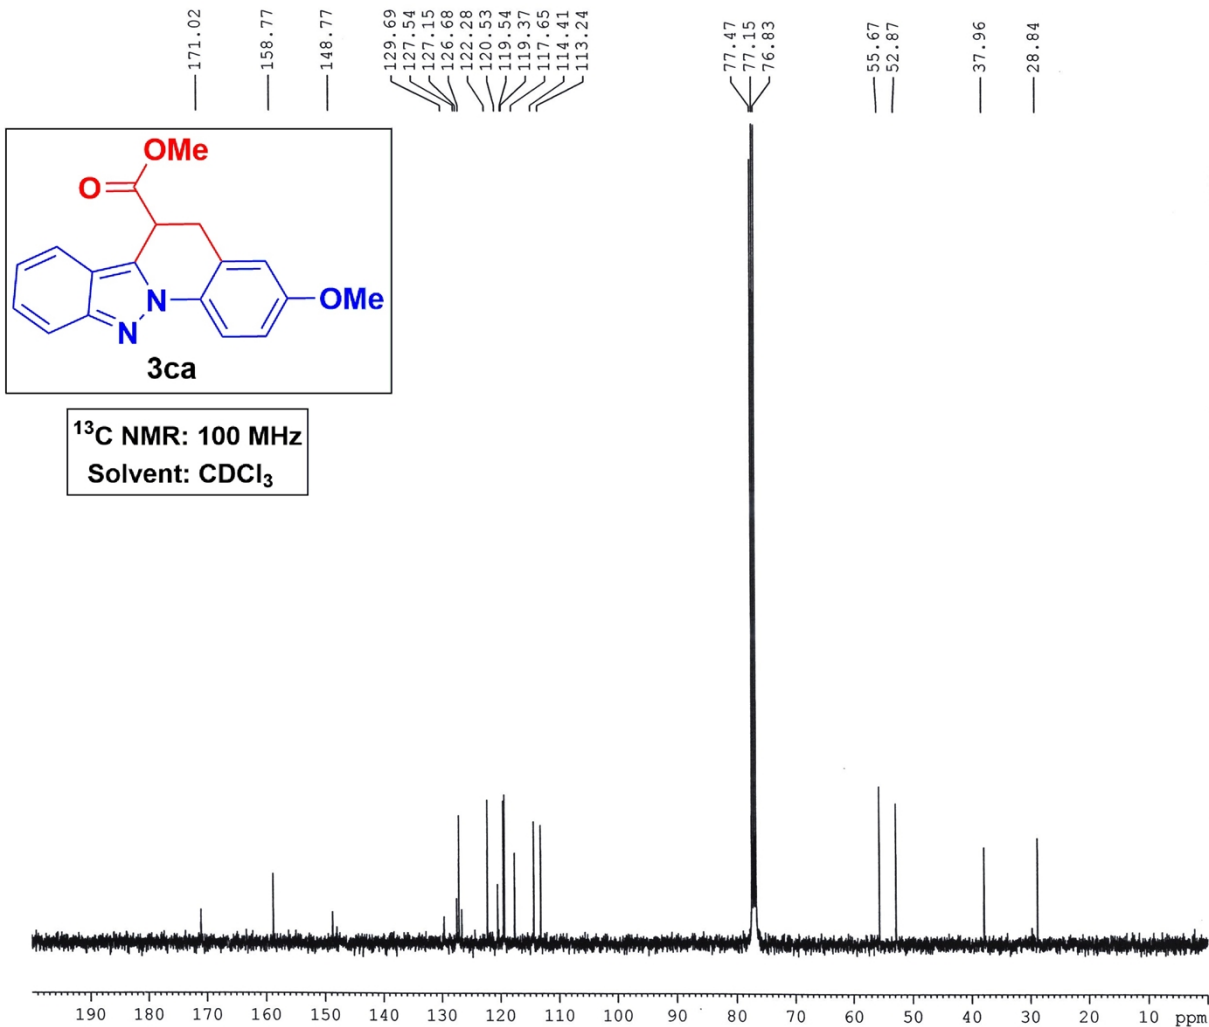

Current Data Parameters  
 NAME Dr. A HAJRA-2023-13C  
 EXPNO 444  
 PROCNO 1

F2 - Acquisition Parameters  
 Date\_ 20231207  
 Time 19.46  
 INSTRUM spect  
 PROBHD 5 mm FAPBO BB/  
 PULPROG zgpg30  
 TD 32768  
 SOLVENT CDCl3  
 NS 520  
 DS 2  
 SWH 24038.461 Hz  
 FIDRES 0.733596 Hz  
 AQ 0.6815744 sec  
 RG 186.42  
 DW 20.800 usec  
 DE 6.50 usec  
 TE 291.7 K  
 D1 2.00000000 sec  
 D11 0.03000000 sec  
 TDO 1

===== CHANNEL f1 =====  
 SFO1 100.6278588 MHz  
 NUC1 13C  
 P1 8.90 usec  
 PLW1 54.00000000 W

===== CHANNEL f2 =====  
 SFO2 400.1516006 MHz  
 NUC2 1H  
 CPDPRG[2] waltz16  
 PCPD2 90.00 usec  
 PLW2 12.00000000 W  
 PLW12 0.32231000 W  
 PLW13 0.16212000 W

F2 - Processing parameters  
 SI 16384  
 SF 100.6177872 MHz  
 WDW EM  
 SSB 0  
 LB 1.00 Hz  
 GB 0  
 PC 1.40

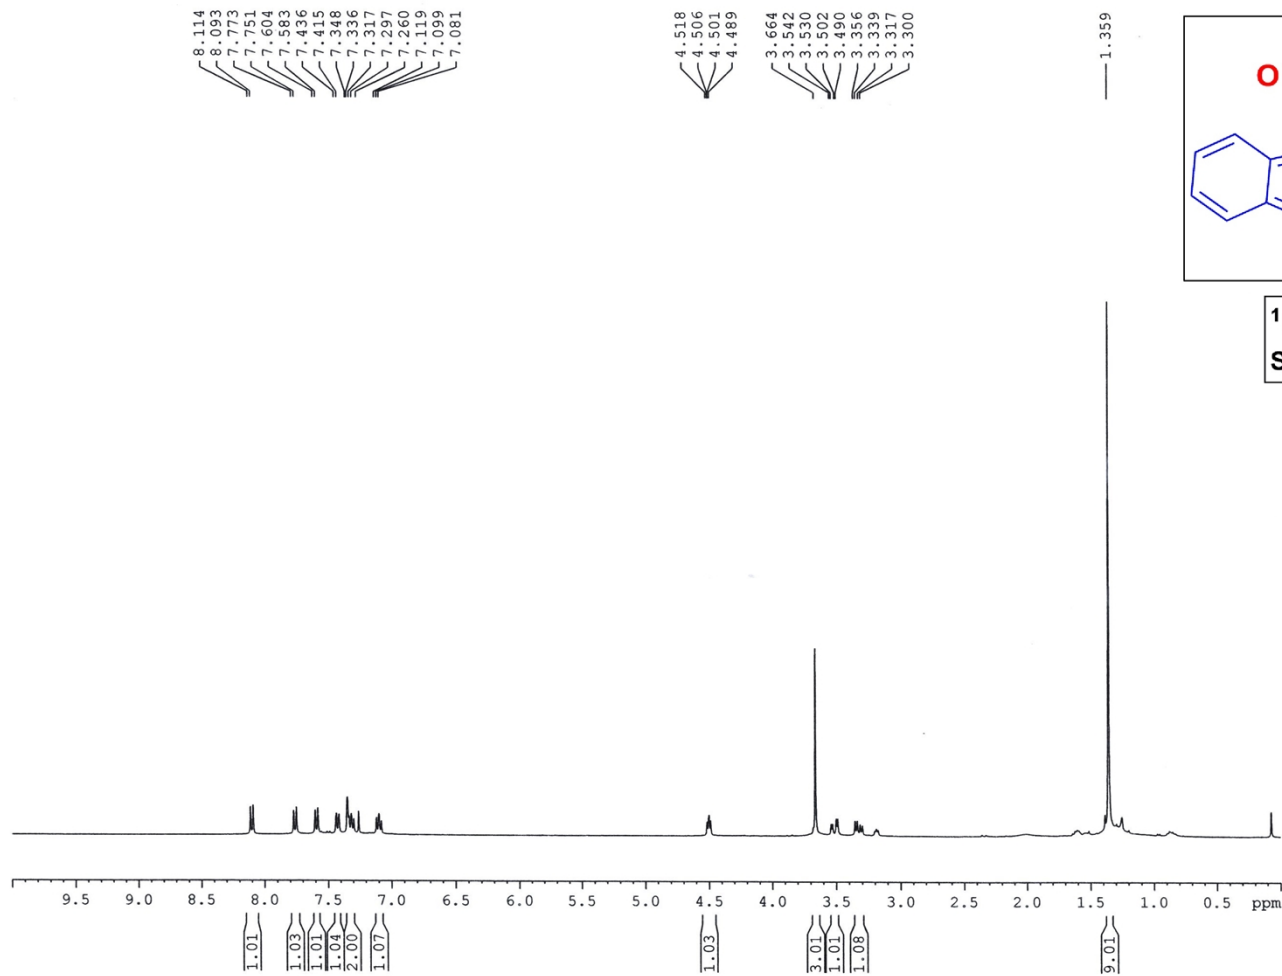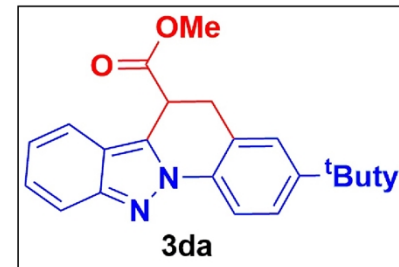

<sup>1</sup>H NMR: 400 MHz  
Solvent: CDCl<sub>3</sub>

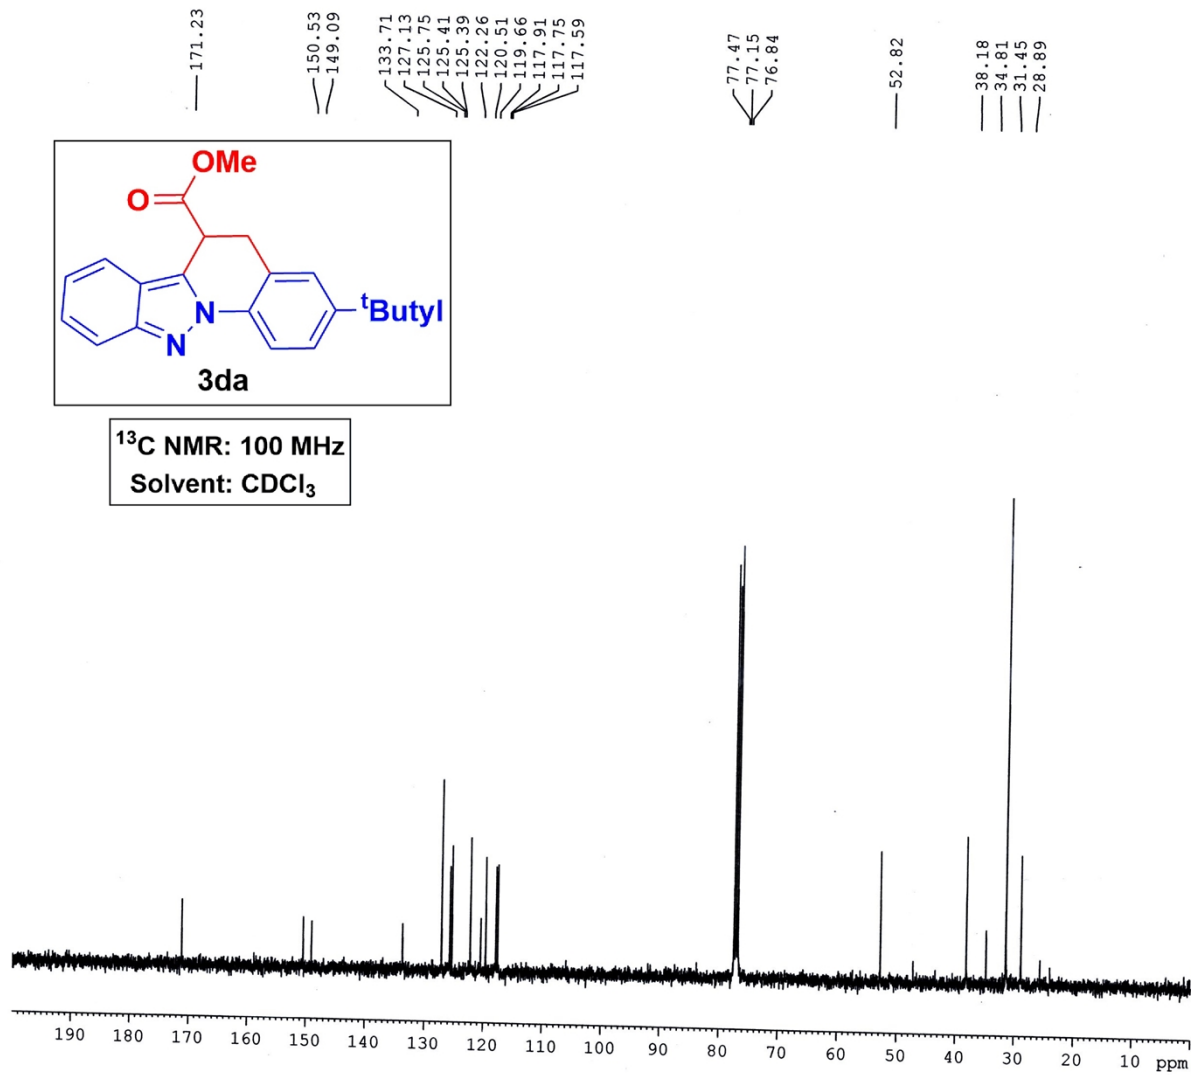

Current Data Parameters  
 NAME Dr. A HAJRA-2024-13C  
 EXPNO 3  
 PROCNO 1

F2 - Acquisition Parameters  
 Date\_ 20240105  
 Time 13.03  
 INSTRUM spect  
 PROBHD 5 mm PABBO BB/  
 PULPROG zgpg30  
 TD 32768  
 SOLVENT CDCl3  
 NS 210  
 DS 2  
 SWH 24038.461 Hz  
 FIDRES 0.733596 Hz  
 AQ 0.6815744 sec  
 RG 186.42  
 DW 20.800 usec  
 DE 6.50 usec  
 TE 291.8 K  
 D1 2.0000000 sec  
 D11 0.0300000 sec  
 TDO 1

----- CHANNEL f1 -----  
 SFO1 100.6278588 MHz  
 NUC1 13C  
 P1 8.90 usec  
 PLW1 54.0000000 W

----- CHANNEL f2 -----  
 SFO2 400.1516006 MHz  
 NUC2 1H  
 CPDPRG2 waltz16  
 PCPD2 90.00 usec  
 PLW2 12.0000000 W  
 PLW12 0.32231000 W  
 PLW13 0.16212000 W

F2 - Processing parameters  
 SI 16384  
 SF 100.6177880 MHz  
 WDW EM  
 SSB 0  
 LB 1.00 Hz  
 GB 0  
 PC 1.40



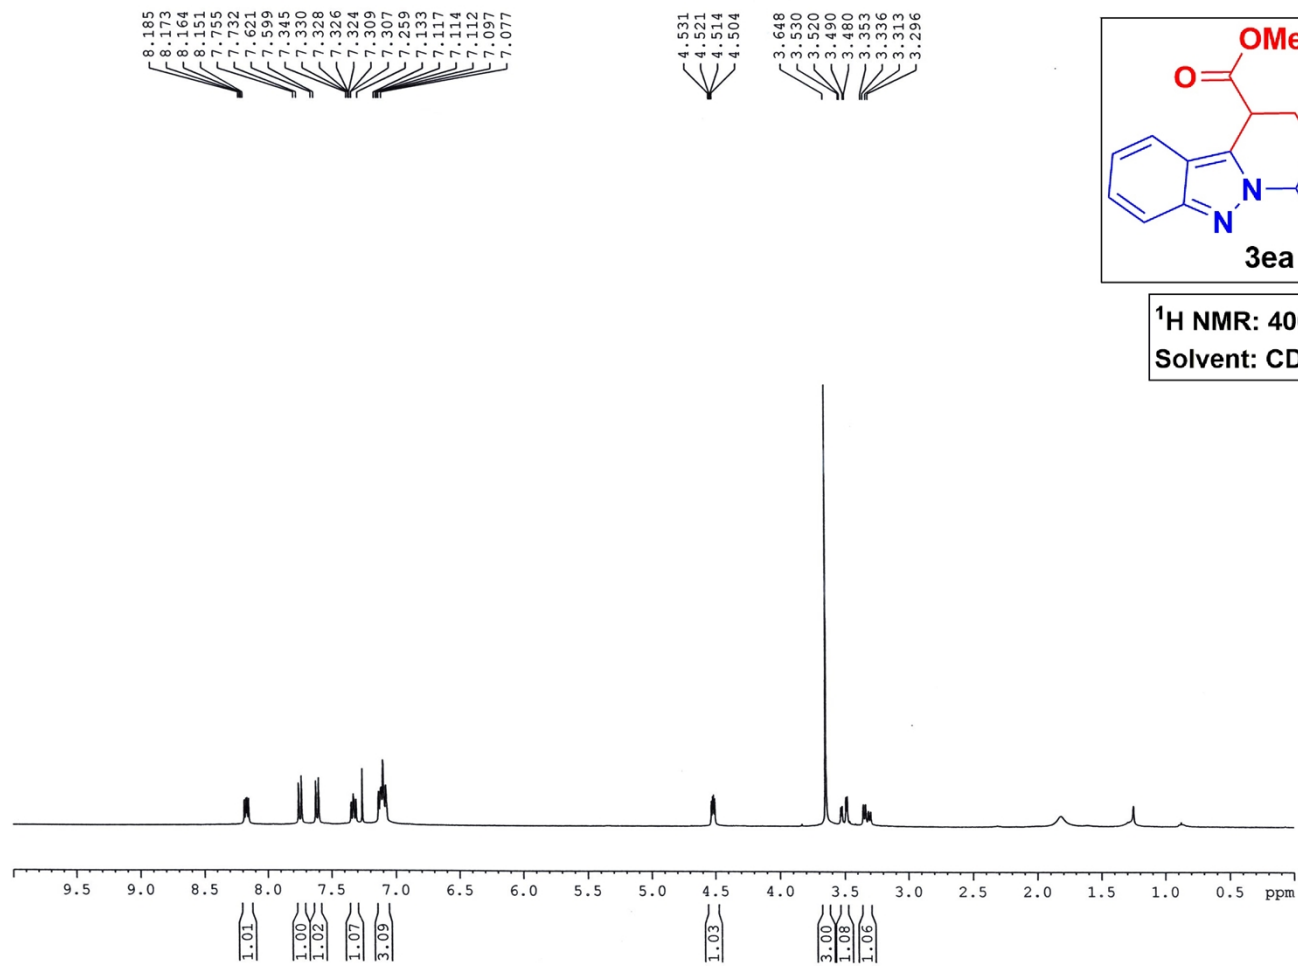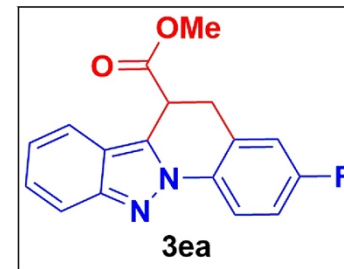

**<sup>1</sup>H NMR: 400 MHz  
Solvent: CDCl<sub>3</sub>**

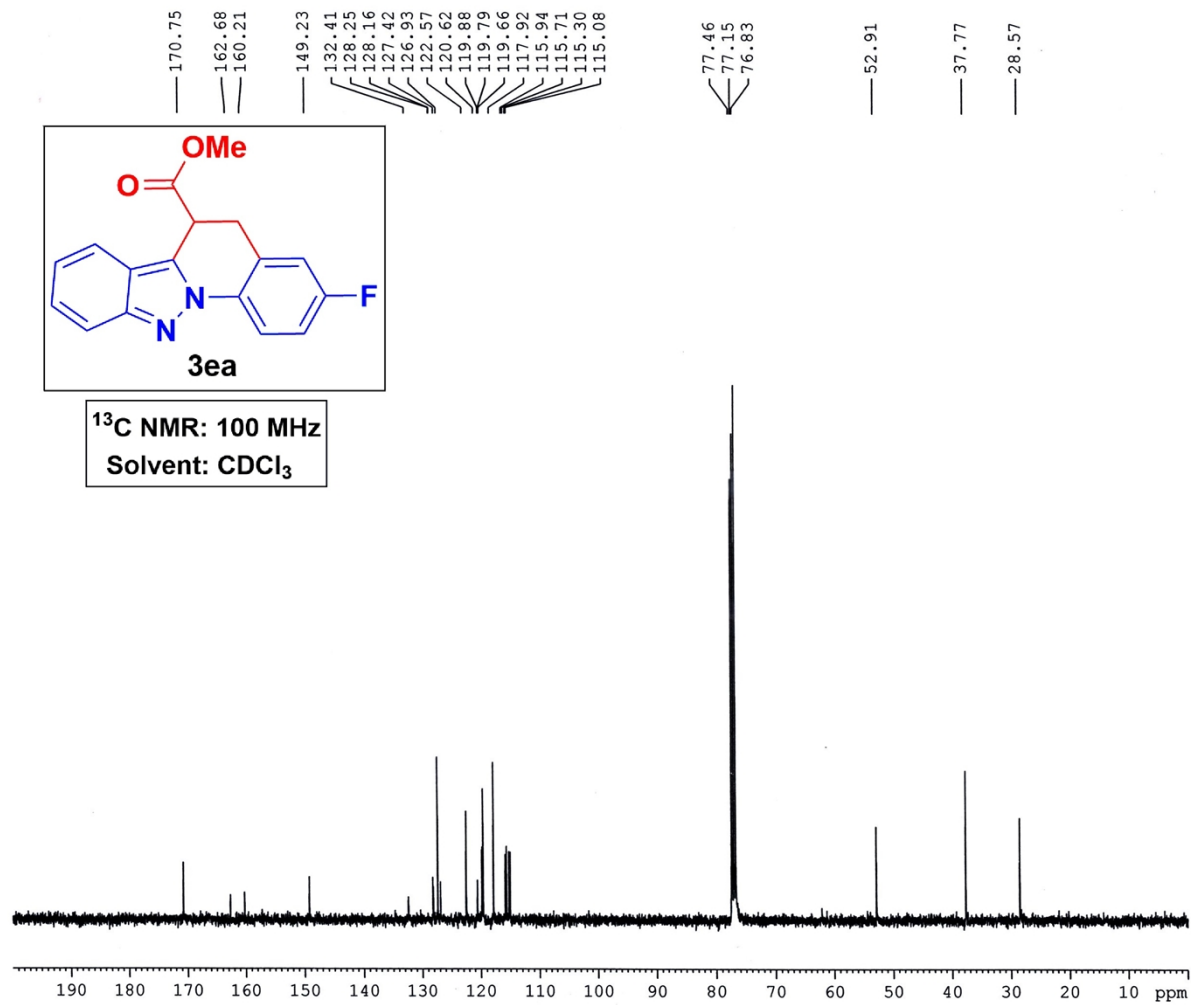

Current Data Parameters  
NAME Dr. A HAJRA-2023-13C  
EXPNO 421  
PROCNO 1

F2 - Acquisition Parameters  
Date\_ 20231104  
Time 11.49  
INSTRUM spect  
PROBHD 5 mm PABBO BB/  
PULPROG zgpg30  
TD 32768  
SOLVENT CDCl3  
NS 380  
DS 2  
SWH 24038.461 Hz  
FIDRES 0.733596 Hz  
AQ 0.6815744 sec  
RG 186.42  
DW 20.800 usec  
DE 6.50 usec  
TE 294.0 K  
D1 2.00000000 sec  
D11 0.03000000 sec  
TDO 1

----- CHANNEL f1 -----  
SFO1 100.6278588 MHz  
NUC1 13C  
P1 8.90 usec  
PLW1 54.00000000 W

----- CHANNEL f2 -----  
SFO2 400.1516006 MHz  
NUC2 1H  
CPDPRG2 waltz16  
PCPD2 90.00 usec  
PLW2 12.00000000 W  
PLW12 0.32231000 W  
PLW13 0.16212000 W

F2 - Processing parameters  
SI 16384  
SF 100.6177872 MHz  
WDW EM  
SSB 0  
LB 1.00 Hz  
GB 0  
PC 1.40

8.140  
8.119  
7.748  
7.726  
7.614  
7.593  
7.394  
7.389  
7.372  
7.367  
7.355  
7.350  
7.330  
7.327  
7.311  
7.309  
7.259  
7.133  
7.115  
7.112  
7.096

4.527  
4.517  
4.510  
4.500

3.648  
3.518  
3.508  
3.478  
3.468  
3.342  
3.325  
3.303  
3.285

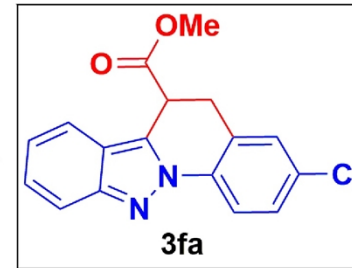

$^1\text{H NMR}$ : 400 MHz  
Solvent:  $\text{CDCl}_3$

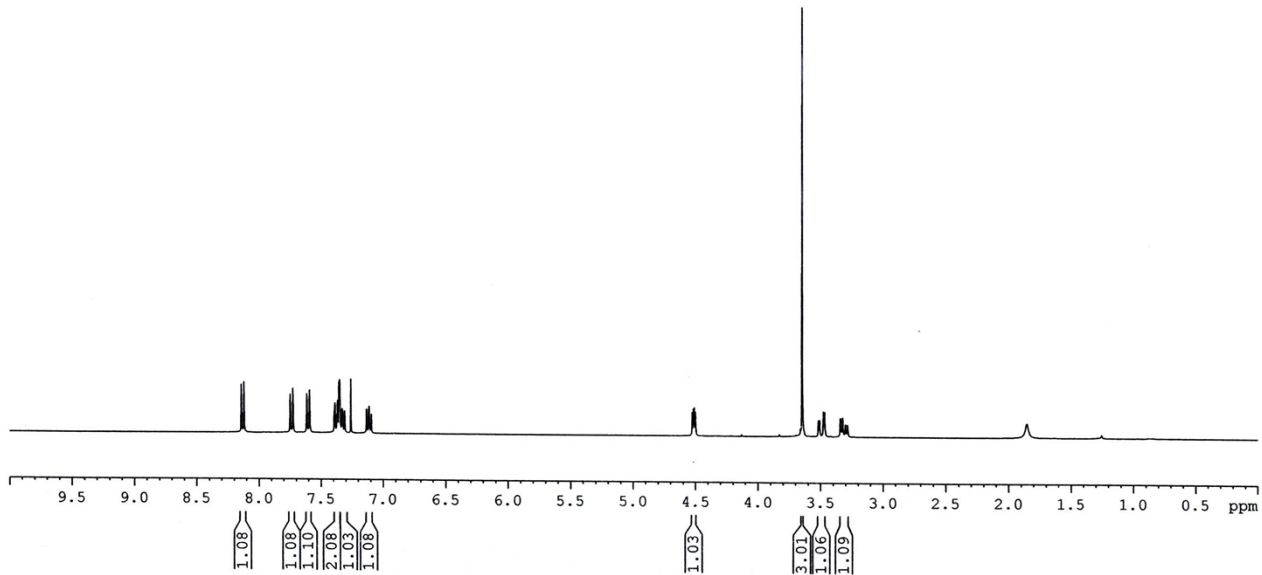

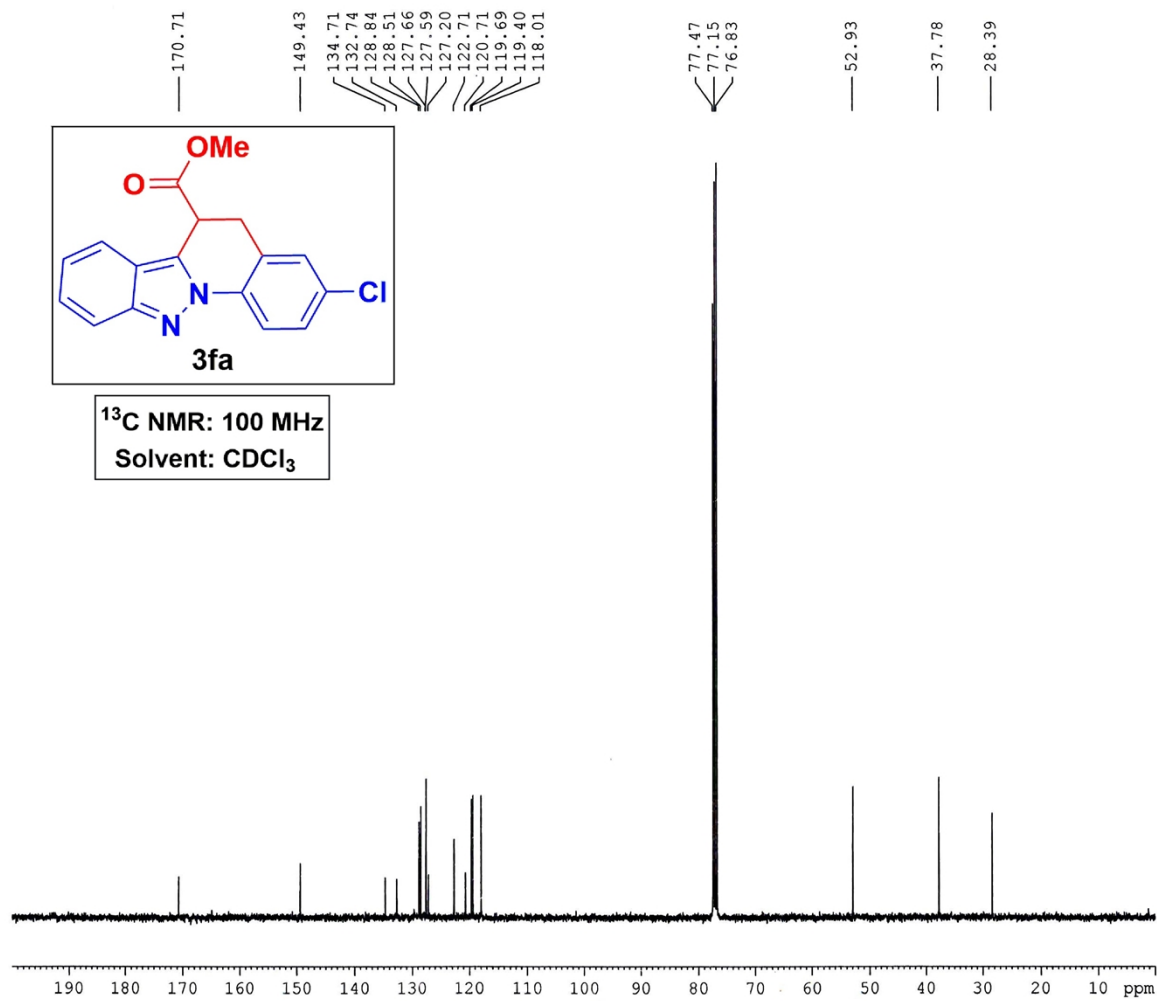

```

Current Data Parameters
NAME      Dr. A HAJRA-2023-13C
EXPNO     347
PROCNO    1

F2 - Acquisition Parameters
Date_     20230830
Time      18.16
INSTRUM   spect
PROBHD    5 mm PABBO BB/
FULPROG   zgpg30
TD         32768
SOLVENT   CDCl3
NS         950
DS         2
SWH        24038.461 Hz
FIDRES     0.733596 Hz
AQ         0.6815744 sec
RG         186.42
DW         20.800 usec
DE         6.50 usec
TE         296.7 K
D1         2.0000000 sec
D11        0.03000000 sec
TDO        1

----- CHANNEL f1 -----
SFO1      100.6278588 MHz
NUC1       13C
P1         8.90 usec
PLW1       54.00000000 W

----- CHANNEL f2 -----
SFO2      400.1516006 MHz
NUC2       1H
PCPD2     waltz16
PCPD2     90.00 usec
PLW2      12.00000000 W
PLW12     0.32231000 W
PLW13     0.16212000 W

F2 - Processing parameters
SI         16384
SF         100.6177858 MHz
WDW        EM
SSB        0
LB         1.00 Hz
GB         0
PC         1.40

```

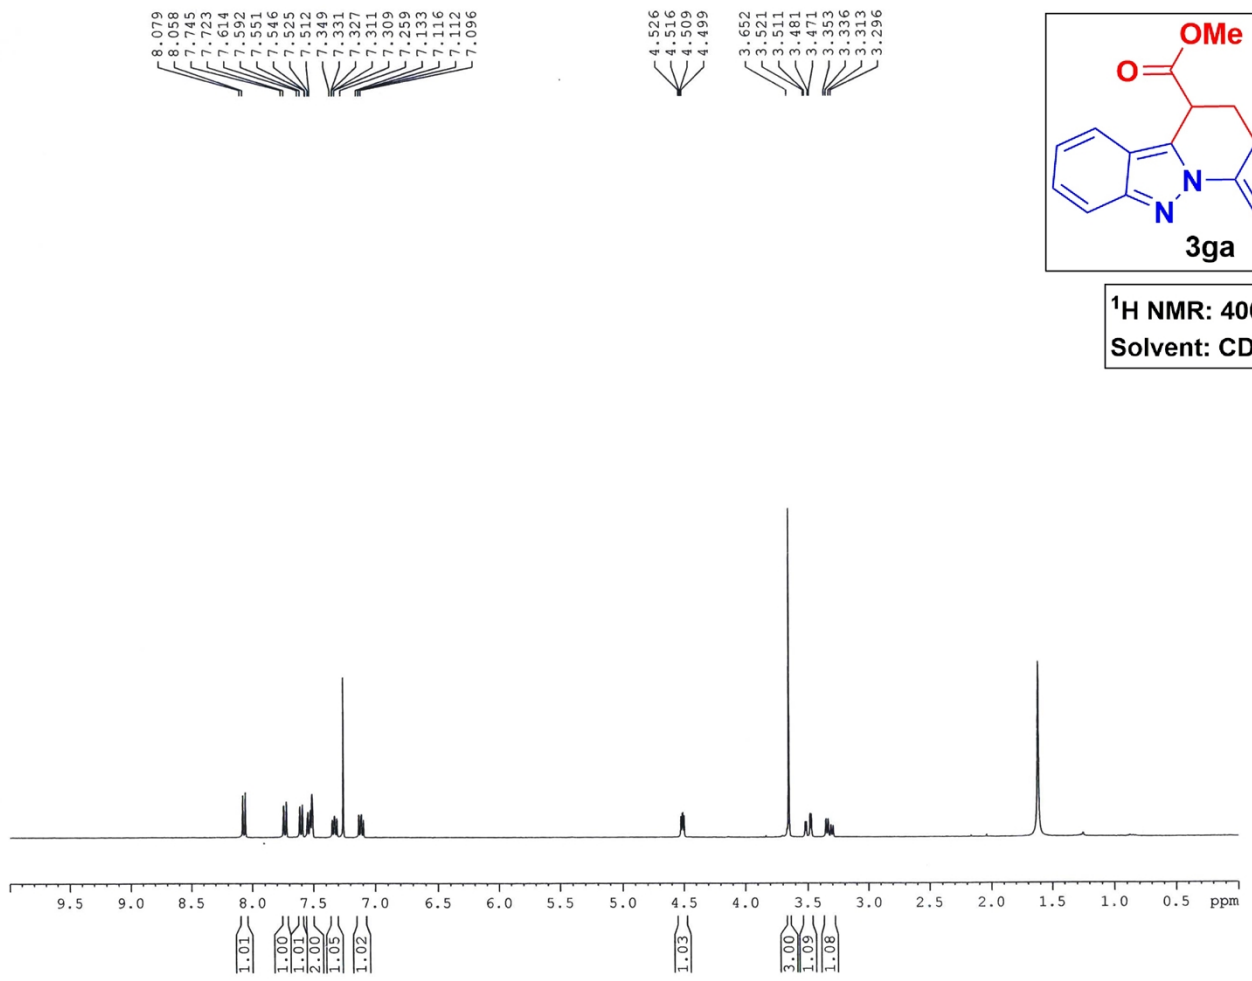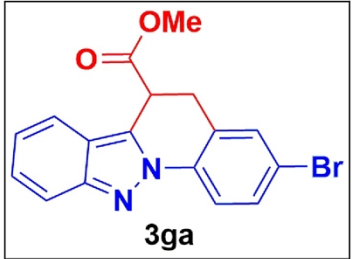

**<sup>1</sup>H NMR: 400 MHz  
Solvent: CDCl<sub>3</sub>**

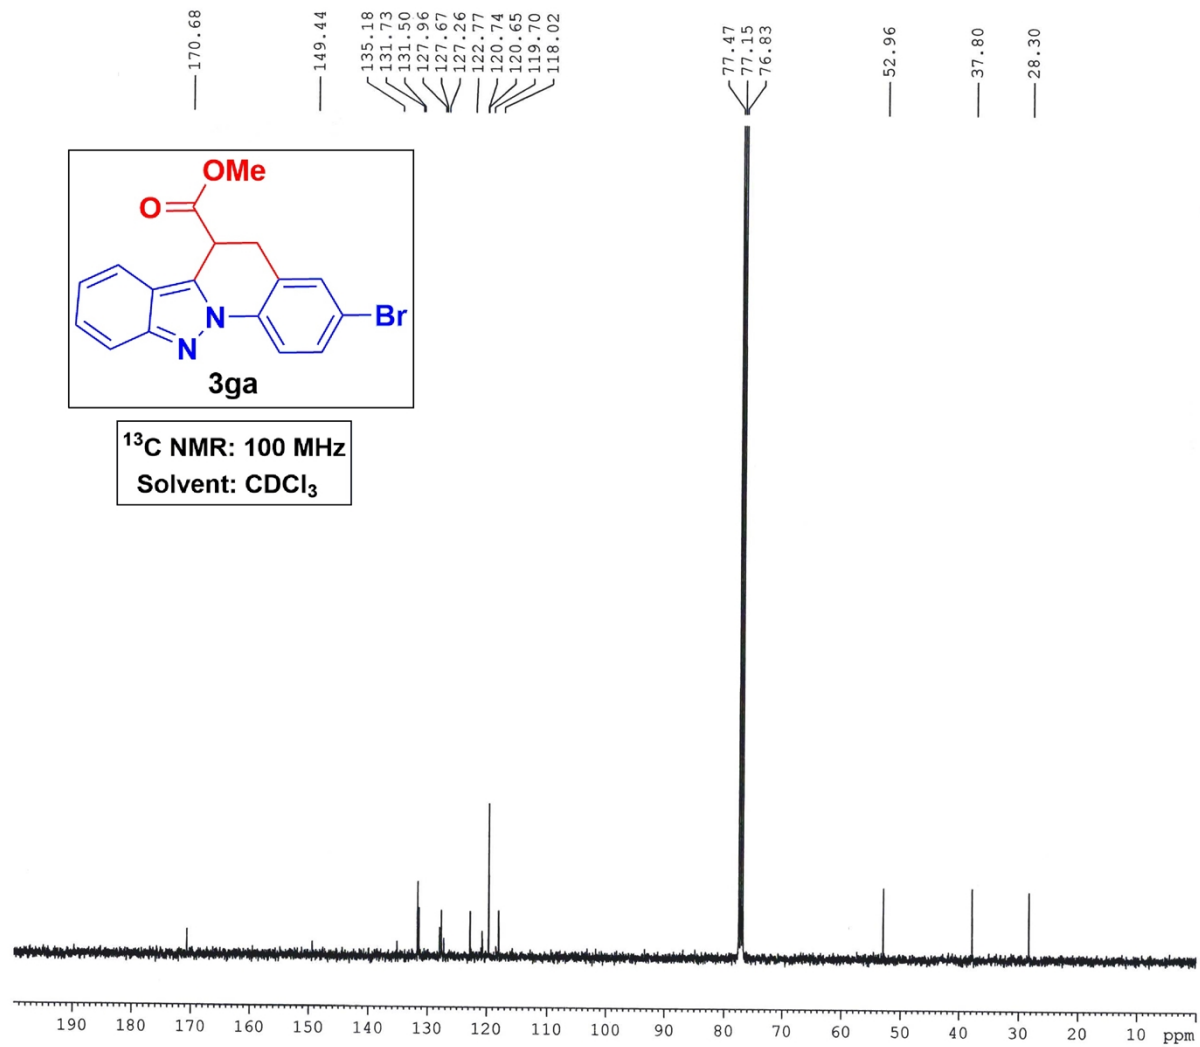

Current Data Parameters  
 NAME Dr. A HAJRA-2023-13C  
 EXPNO 377  
 PROCNO 1

F2 - Acquisition Parameters  
 Date\_ 20230918  
 Time 18.21  
 INSTRUM spect  
 PROBHD 5 mm PABBO BB/  
 PULPROG zgpg30  
 TD 32768  
 SOLVENT CDC13  
 NS 1024  
 DS 2  
 SWH 24038.461 Hz  
 FIDRES 0.733596 Hz  
 AQ 0.6815744 sec  
 RG 186.42  
 DW 20.800 usec  
 DE 6.50 usec  
 TE 296.5 K  
 D1 2.0000000 sec  
 D11 0.03000000 sec  
 TDO 1

===== CHANNEL f1 =====  
 SFO1 100.6278588 MHz  
 NUC1 13C  
 P1 8.90 usec  
 PLW1 54.00000000 W

===== CHANNEL f2 =====  
 SFO2 400.1516006 MHz  
 NUC2 1H  
 CPDPRG[2] waltz16  
 PCPDZ 90.00 usec  
 PLW2 12.00000000 W  
 PLW12 0.32231000 W  
 PLW13 0.16212000 W

F2 - Processing parameters  
 SI 16384  
 SF 100.6177844 MHz  
 WDW EM  
 SSB 0  
 LB 1.00 Hz  
 GB 0  
 PC 1.40

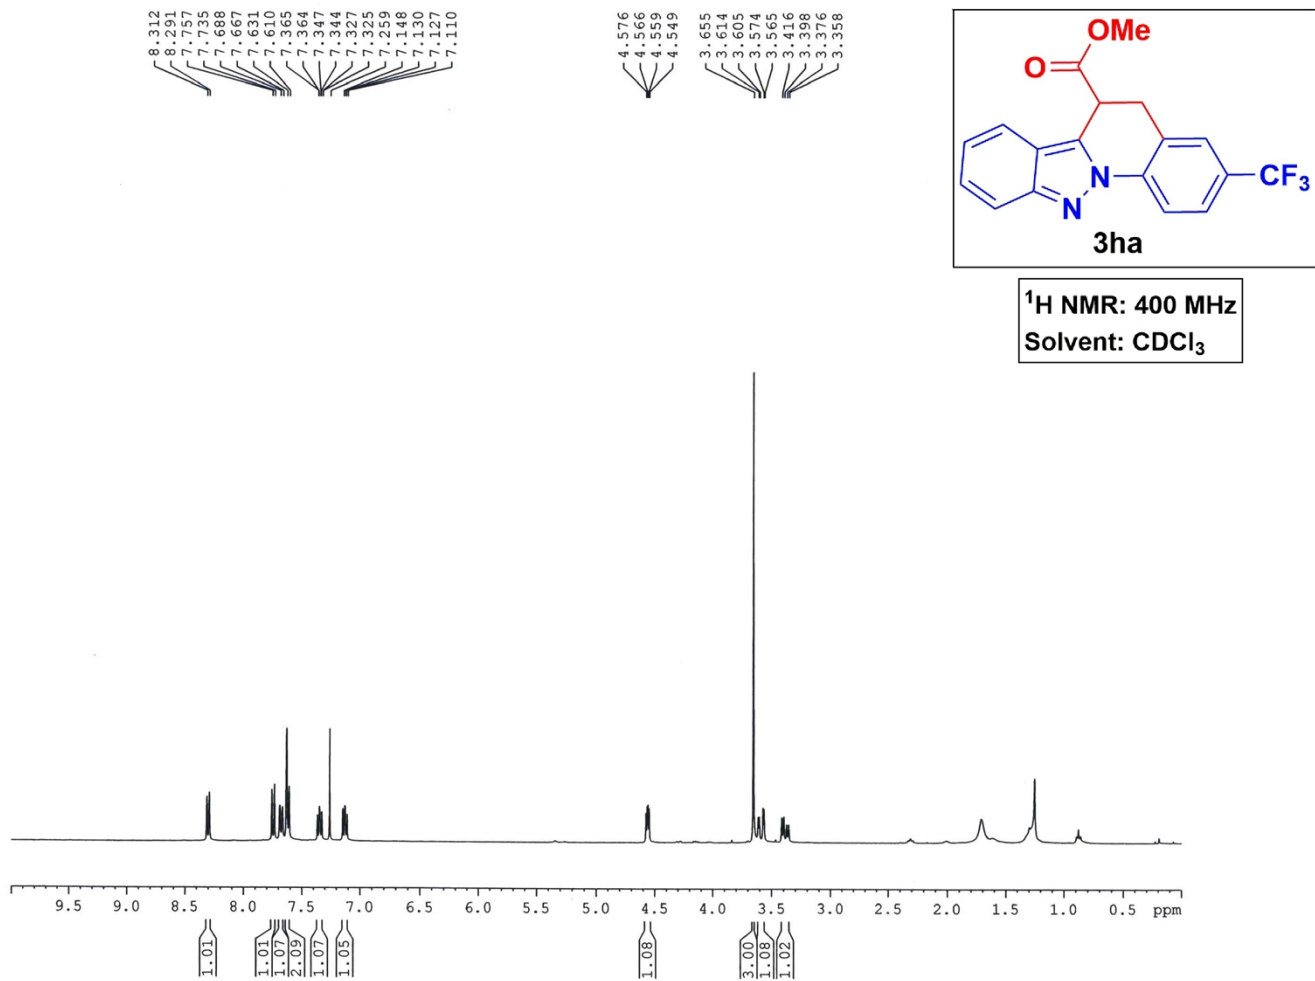

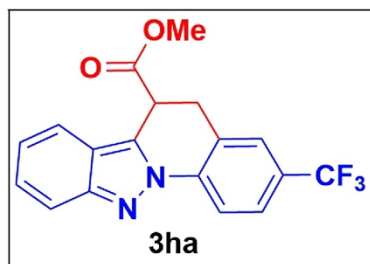

<sup>13</sup>C NMR: 100 MHz  
Solvent: CDCl<sub>3</sub>

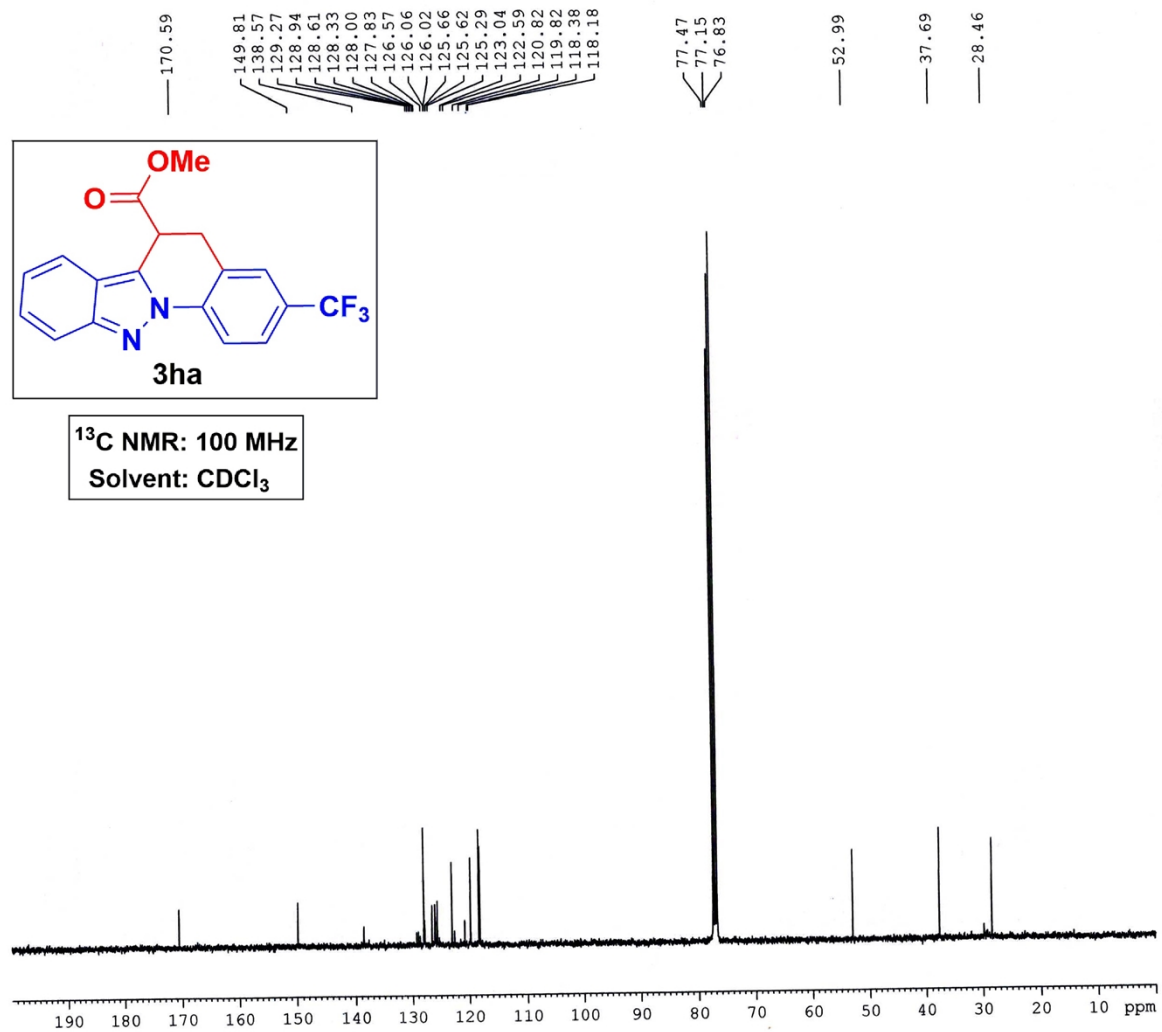

Current Data Parameters  
NAME Dr. A HAJRA-2023-13C  
EXPNO 426  
PROCNO 1

F2 - Acquisition Parameters  
Date\_ 20231106  
Time 11.31  
INSTRUM spect  
PROBHD 5 mm PABBO BB/  
PULPROG zgpg30  
TD 32768  
SOLVENT CDCl3  
NS 1520  
DS 2  
SWH 24038.461 Hz  
FIDRES 0.733596 Hz  
AQ 0.6815744 sec  
RG 186.42  
DW 20.800 usec  
DE 6.50 usec  
TE 296.3 K  
D1 2.00000000 sec  
D11 0.03000000 sec  
TDO 1

----- CHANNEL f1 -----  
SFO1 100.6278588 MHz  
NUC1 13C  
P1 8.90 usec  
PLW1 54.00000000 W

----- CHANNEL f2 -----  
SFO2 400.1516006 MHz  
NUC2 1H  
CPDPRG2 waltz16  
PCPD2 90.00 usec  
PLW2 12.00000000 W  
PLW12 0.32231000 W  
PLW13 0.16212000 W

F2 - Processing parameters  
SI 16384  
SF 100.6177857 MHz  
WDW EM  
SSB 0  
LB 1.00 Hz  
GB 0  
PC 1.40



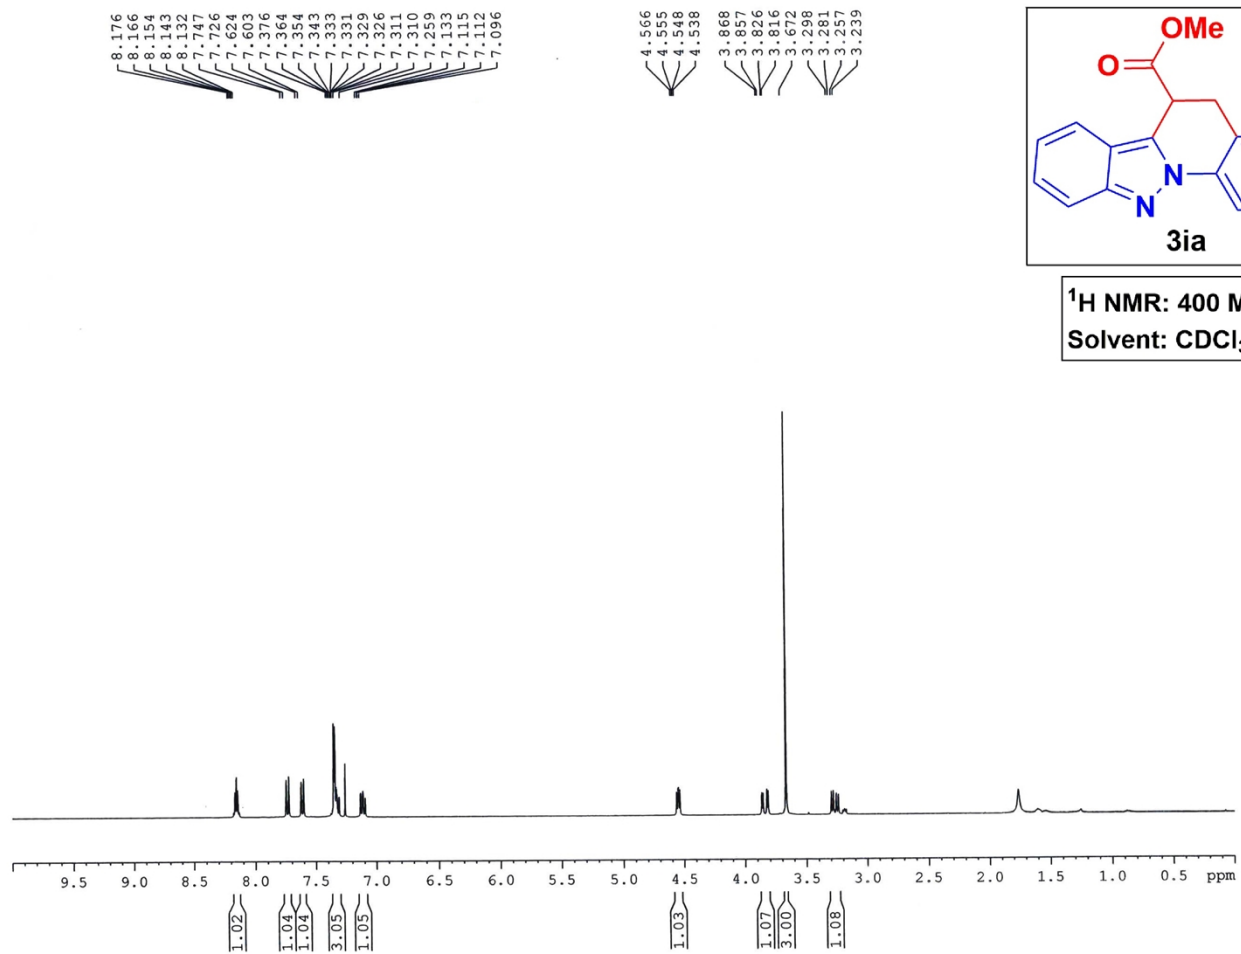

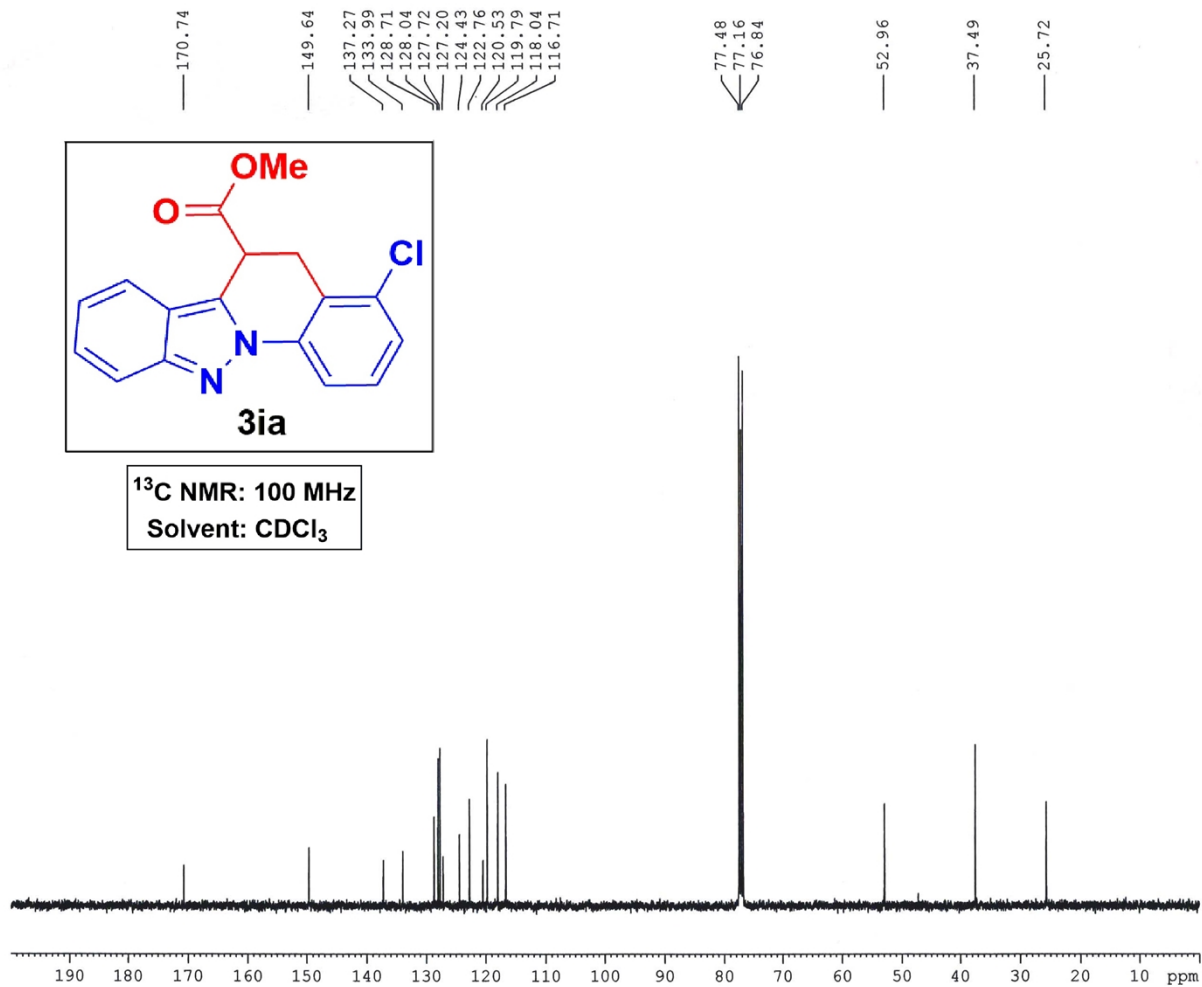

Current Data Parameters  
 NAME Dr. A HAJRA-2023-13C  
 EXPNO 393  
 PROCNO 1

F2 - Acquisition Parameters  
 Date\_ 20230927  
 Time 12.05  
 INSTRUM spect  
 PROBHD 5 mm PABBO BB/  
 PULPROG zgpg30  
 TD 32768  
 SOLVENT CDCl3  
 NS 450  
 DS 2  
 SWH 24038.461 Hz  
 FIDRES 0.733596 Hz  
 AQ 0.6815744 sec  
 RG 186.42  
 DW 20.800 usec  
 DE 6.50 usec  
 TE 296.2 K  
 D1 2.0000000 sec  
 D11 0.0300000 sec  
 TD0 1

===== CHANNEL f1 =====  
 SFO1 100.6278588 MHz  
 NUC1 13C  
 P1 8.90 usec  
 PLW1 54.0000000 W

===== CHANNEL f2 =====  
 SFO2 400.1516006 MHz  
 NUC2 1H  
 CPDPRG2 waltz16  
 PCPD2 90.00 usec  
 PLW2 12.0000000 W  
 PLW12 0.32231000 W  
 PLW13 0.16212000 W

F2 - Processing parameters  
 SI 16384  
 SF 100.6177858 MHz  
 WDW EM  
 SSB 0  
 LB 1.00 Hz  
 GB 0  
 EC 1.40

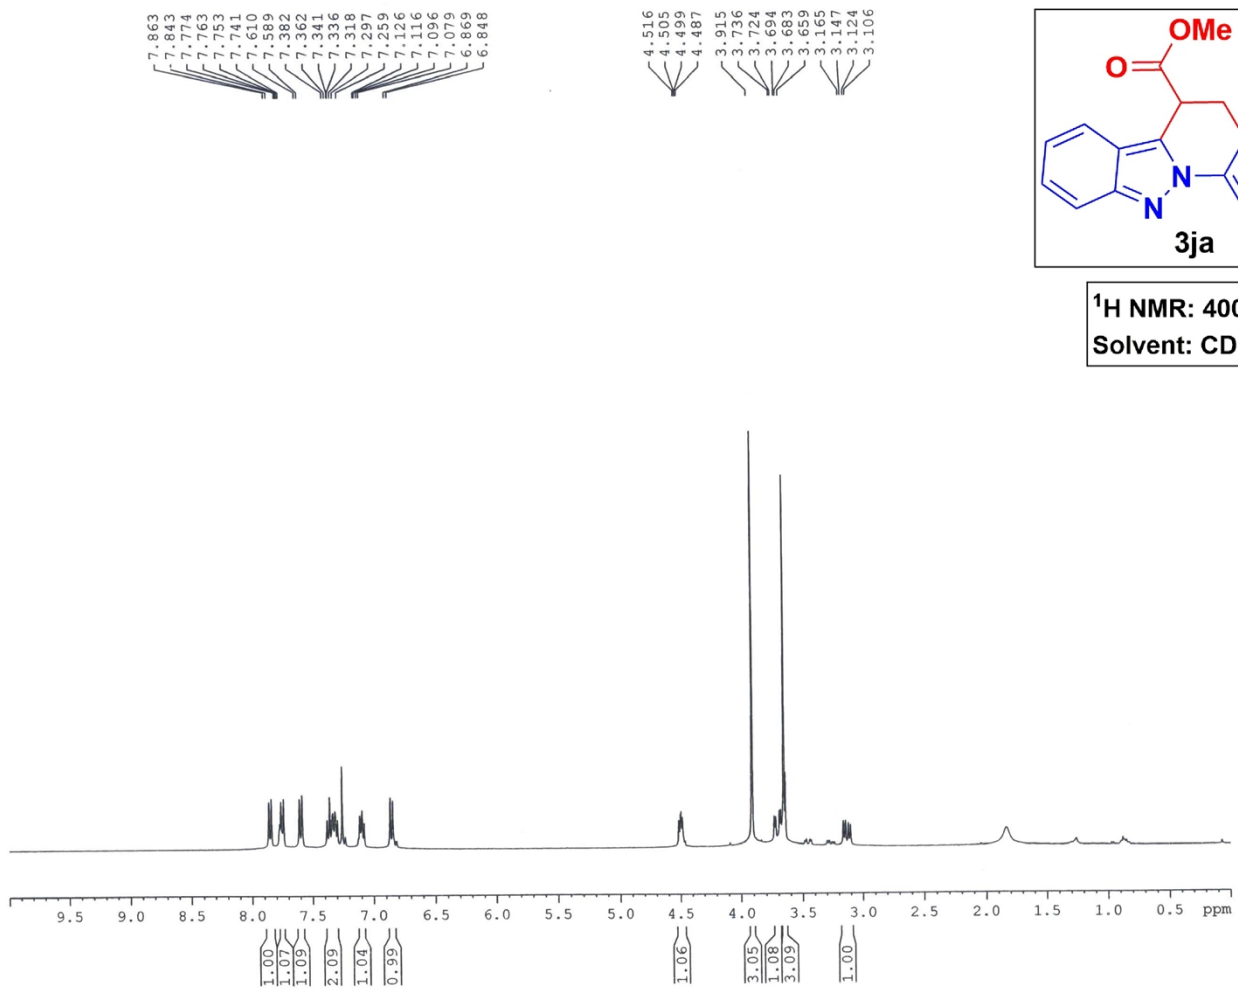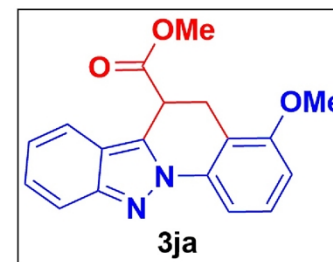

**<sup>1</sup>H NMR: 400 MHz**  
**Solvent: CDCl<sub>3</sub>**

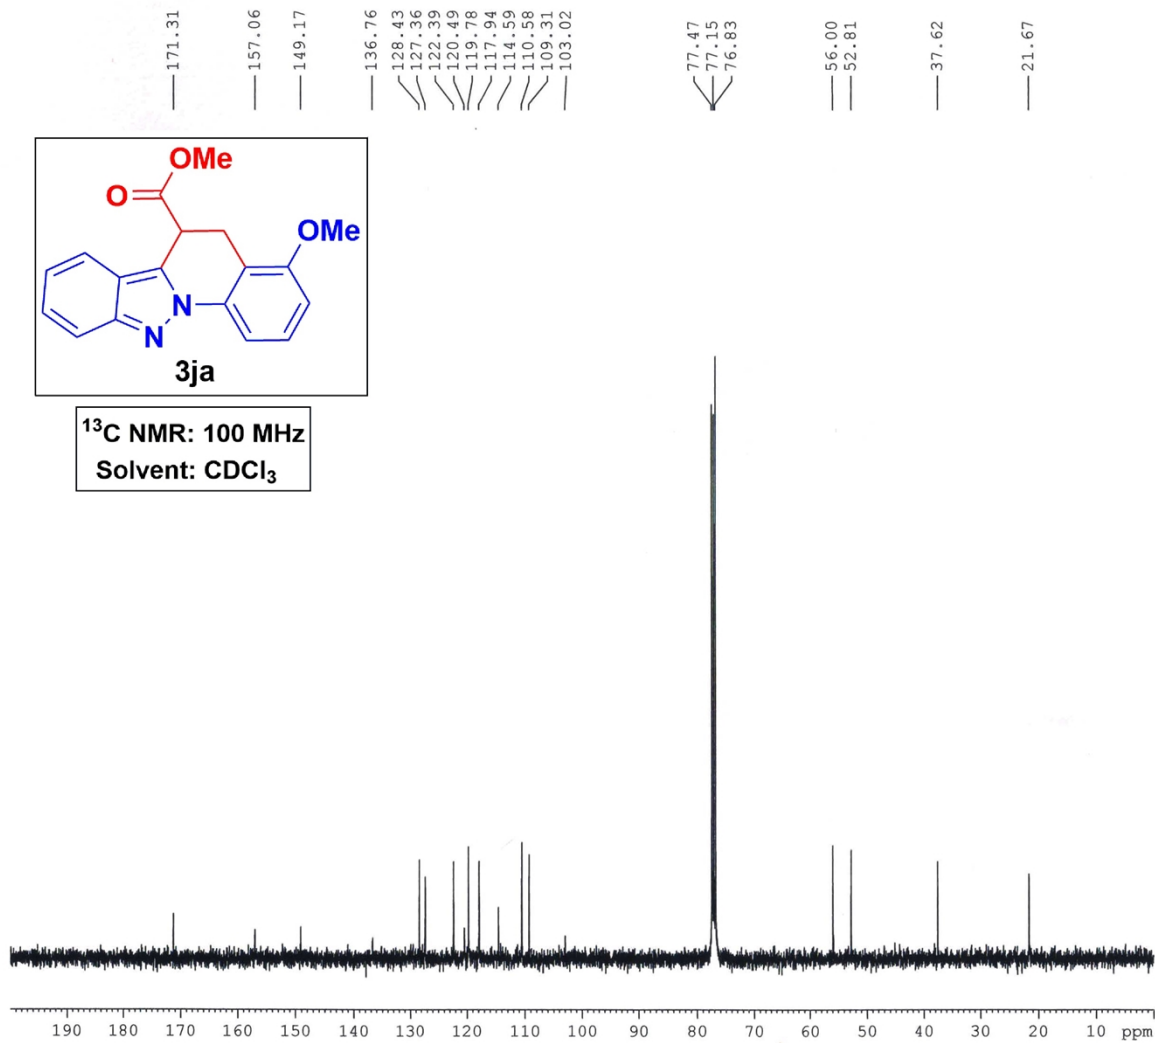

Current Data Parameters  
 NAME Dr. A HAJRA-2024-13C  
 EXPNO 32  
 PROCNO 1

F2 - Acquisition Parameters  
 Date 20240205  
 Time 10.50  
 INSTRUM spect  
 PROBHD 5 mm PABBO BB/  
 PULPROG zgpg30  
 TD 32768  
 SOLVENT CDCl3  
 NS 320  
 DS 2  
 SWH 24038.461 Hz  
 FIDRES 0.733596 Hz  
 AQ 0.6815744 sec  
 RG 186.42  
 DW 20.800 usec  
 DE 6.50 usec  
 TE 293.9 K  
 D1 2.00000000 sec  
 D11 0.03000000 sec  
 TDO 1

===== CHANNEL f1 =====  
 SFO1 100.6278588 MHz  
 NUC1 13C  
 P1 8.90 usec  
 PLW1 54.00000000 W

===== CHANNEL f2 =====  
 SFO2 400.1516006 MHz  
 NUC2 1H  
 CPDPRG2 waltz16  
 PCPD2 90.00 usec  
 PLW2 12.00000000 W  
 PLW12 0.32231000 W  
 PLW13 0.16212000 W

F2 - Processing parameters  
 SI 16384  
 SF 100.6177868 MHz  
 WDW EM  
 SSB 0  
 LB 1.00 Hz  
 GB 0  
 PC 1.40

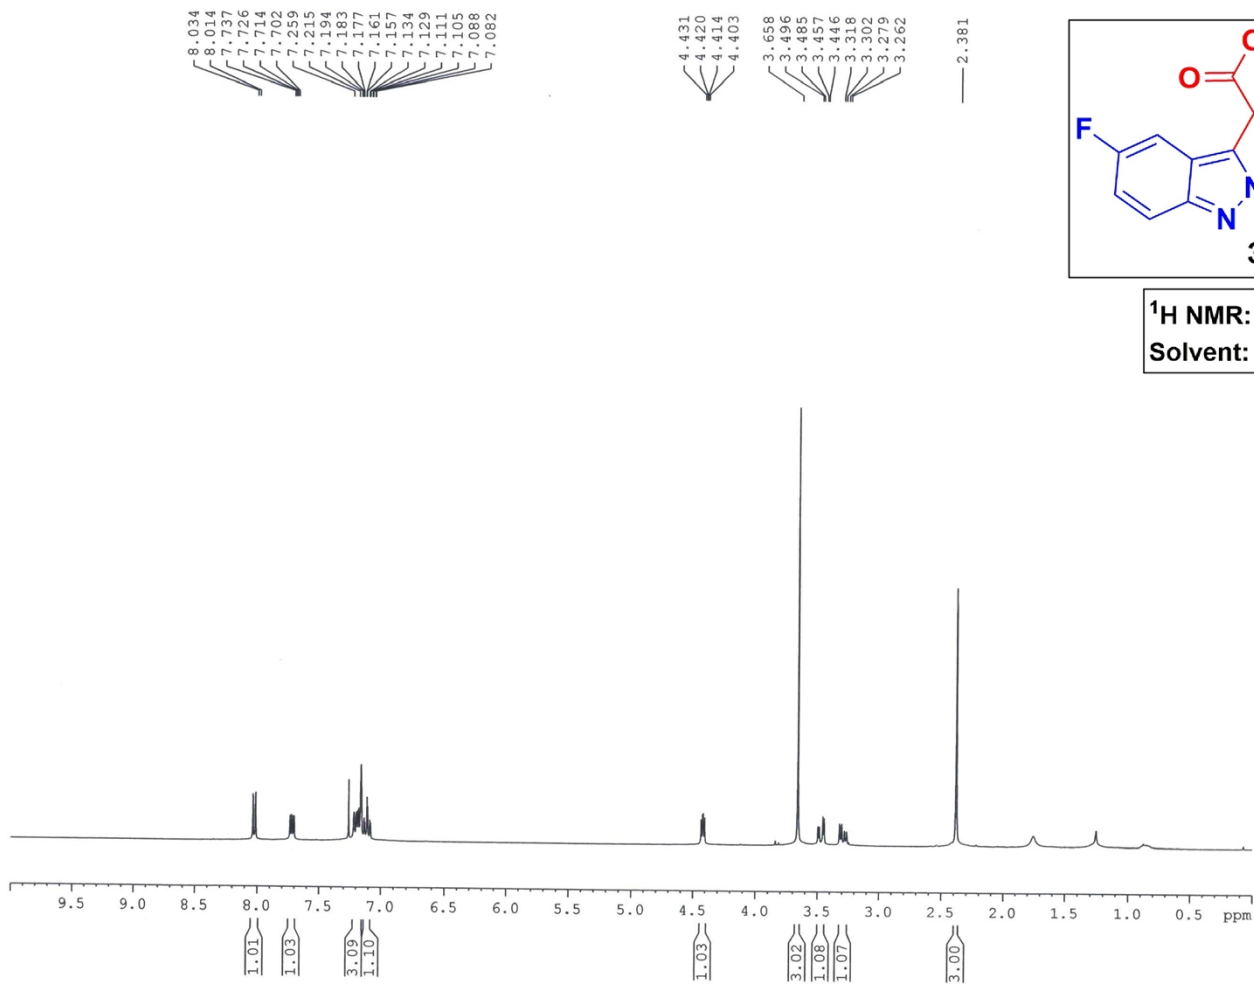

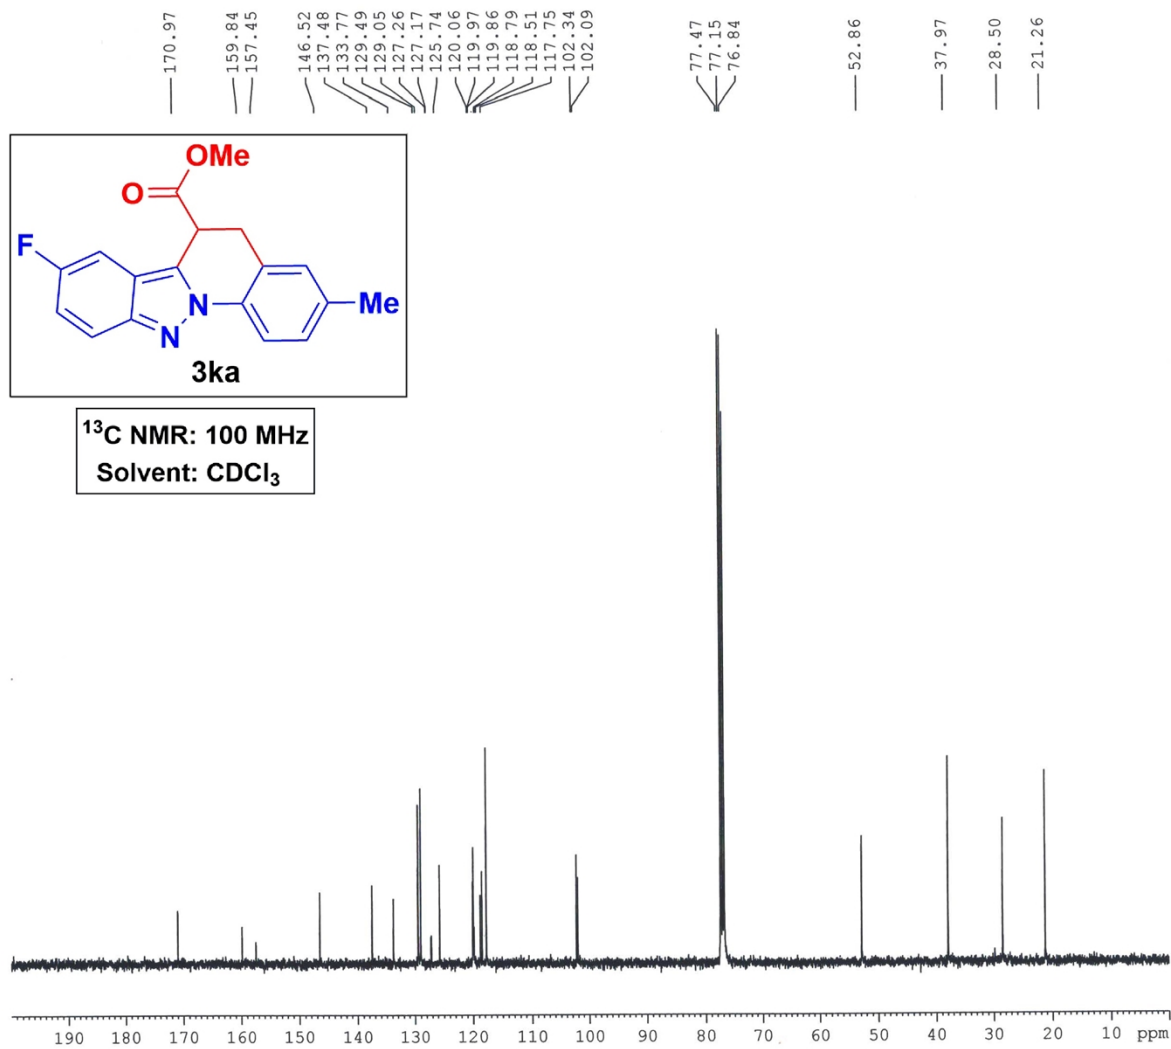

Current Data Parameters  
NAME Dr. A HAJRA-2023-13C  
EXPNO 441  
PROCNO 1

F2 - Acquisition Parameters  
Date\_ 20231201  
Time 10.57  
INSTRUM spect  
PROBHD 5 mm PABBO BB/  
PULPROG zgpg30  
TD 32768  
SOLVENT CDCl3  
NS 950  
DS 2  
SWH 24038.461 Hz  
FIDRES 0.733596 Hz  
AQ 0.6815744 sec  
RG 186.42  
DW 20.800 usec  
DE 6.50 usec  
TE 294.5 K  
D1 2.0000000 sec  
D11 0.0300000 sec  
TD0 1

===== CHANNEL f1 =====  
SFO1 100.6278588 MHz  
NUC1 13C  
P1 8.90 usec  
PLW1 54.0000000 W

===== CHANNEL f2 =====  
SFO2 400.1516006 MHz  
NUC2 1H  
CPDPRG[2] waltz16  
PCPD2 90.00 usec  
PLW2 12.0000000 W  
PLW12 0.32231000 W  
PLW13 0.16212000 W

F2 - Processing parameters  
SI 16384  
SF 100.6177858 MHz  
WDW EM  
SSB 0  
LB 1.00 Hz  
GB 0  
PC 1.40

8.078  
8.056  
7.728  
7.716  
7.704  
7.693  
7.260  
7.182  
7.176  
7.160  
7.154  
7.128  
7.122  
7.105  
7.099  
7.082  
7.076  
6.935  
6.929  
6.913  
6.907  
6.896  
6.880

4.434  
4.424  
4.418  
4.407  
3.853  
3.660  
3.502  
3.492  
3.463  
3.452  
3.331  
3.314  
3.291  
3.274

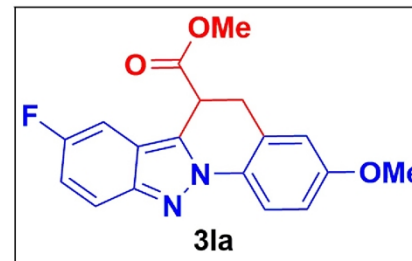

<sup>1</sup>H NMR: 400 MHz  
Solvent: CDCl<sub>3</sub>

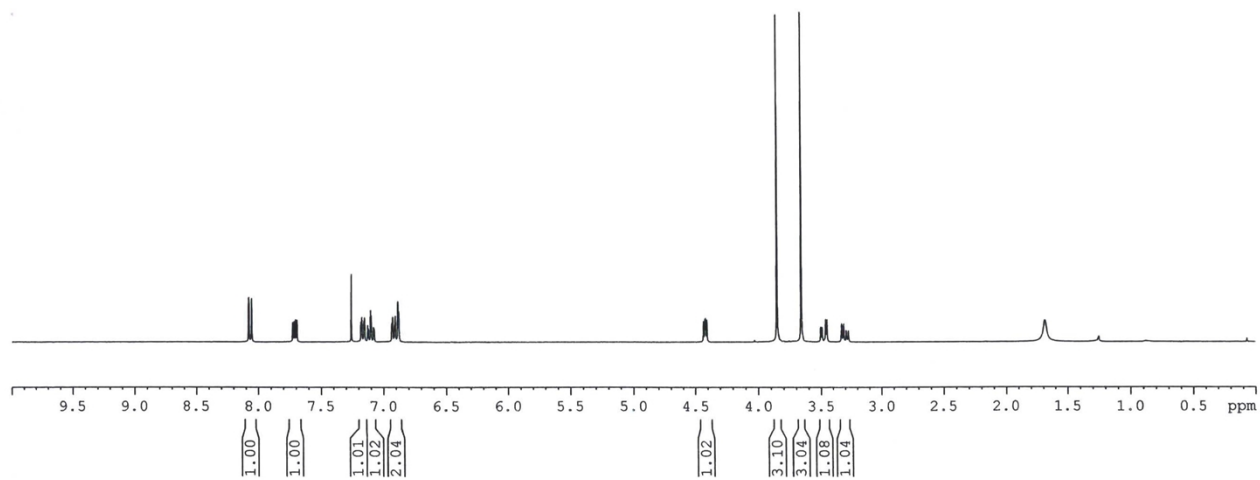

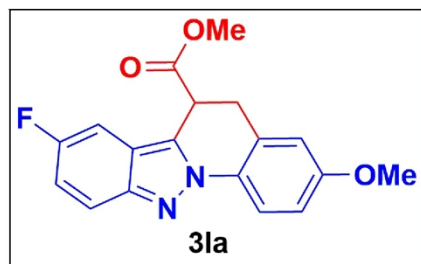

**<sup>13</sup>C NMR: 100 MHz**  
**Solvent: CDCl<sub>3</sub>**

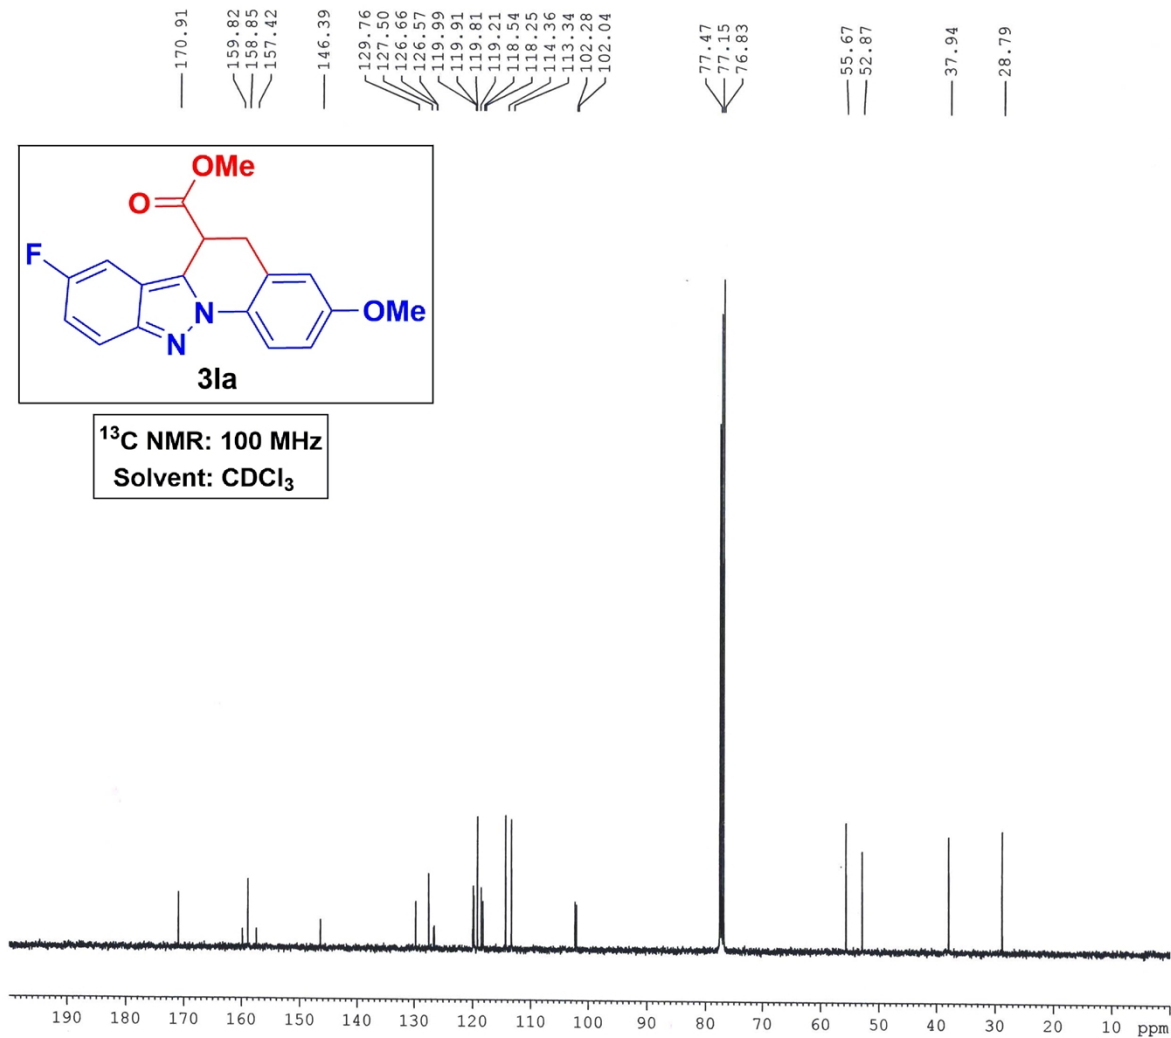

Current Data Parameters  
 NAME Dr. A HA.FRA-2023-13C  
 EXPNO 367  
 PROCNO 1

F2 - Acquisition Parameters  
 Date\_ 20230915  
 Time 12.24  
 INSTRUM spect  
 PROBHD 5 mm PABBO BB/  
 PULPROG zgpg30  
 TD 32768  
 SOLVENT CDCl3  
 NS 950  
 DS 2  
 SWH 24038.461 Hz  
 FIDRES 0.733596 Hz  
 AQ 0.6815744 sec  
 RG 186.42  
 DW 20.800 usec  
 DE 6.50 usec  
 TE 296.5 K  
 D1 2.0000000 sec  
 D11 0.0300000 sec  
 TDO 1

===== CHANNEL f1 =====  
 SFO1 100.6278588 MHz  
 NUC1 13C  
 P1 8.90 usec  
 PLW1 54.0000000 W

===== CHANNEL f2 =====  
 SFO2 400.1516006 MHz  
 NUC2 1H  
 CPDPRG[2] waltz16  
 PCPD2 90.00 usec  
 PLW2 12.0000000 W  
 PLW12 0.32231000 W  
 PLW13 0.16212000 W

F2 - Processing parameters  
 SI 16384  
 SF 100.6177858 MHz  
 WDW EM  
 SSB 0  
 LB 1.00 Hz  
 GB 0  
 PC 1.40



8.091  
8.070  
7.724  
7.713  
7.700  
7.689  
7.388  
7.360  
7.259  
7.189  
7.184  
7.167  
7.161  
7.152  
7.146  
7.129  
7.123  
7.106  
7.100

4.458  
4.448  
4.441  
4.431  
3.662  
3.517  
3.507  
3.477  
3.467  
3.337  
3.320  
3.297  
3.280

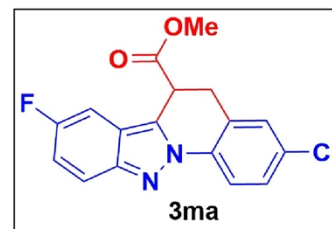

**<sup>1</sup>H NMR: 400 MHz  
Solvent: CDCl<sub>3</sub>**

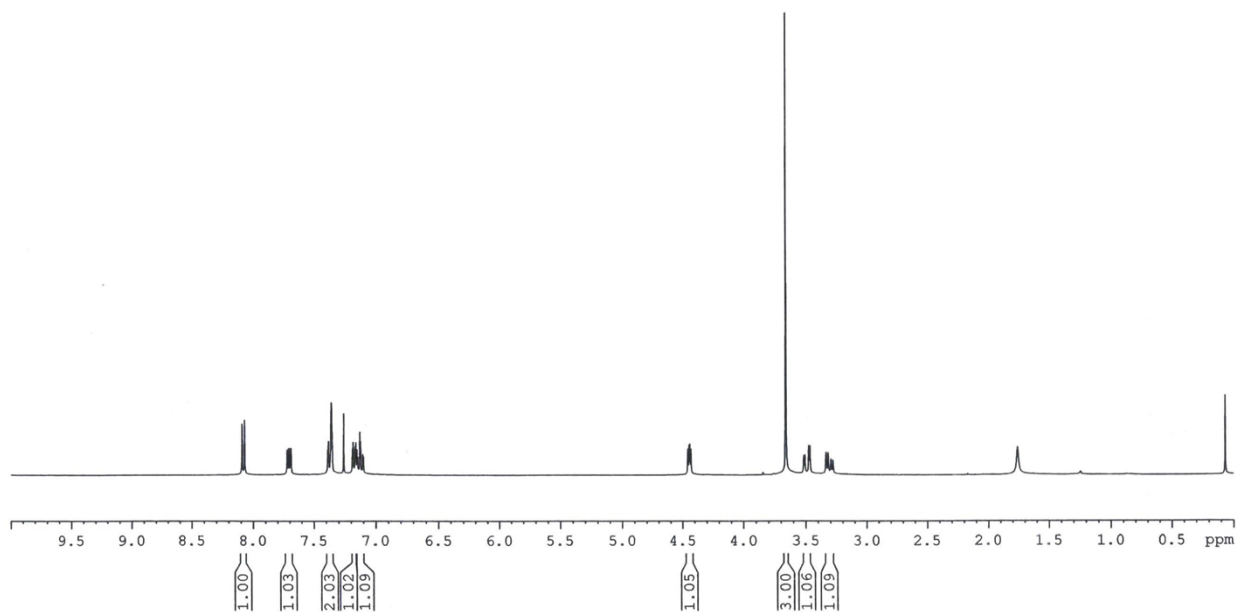

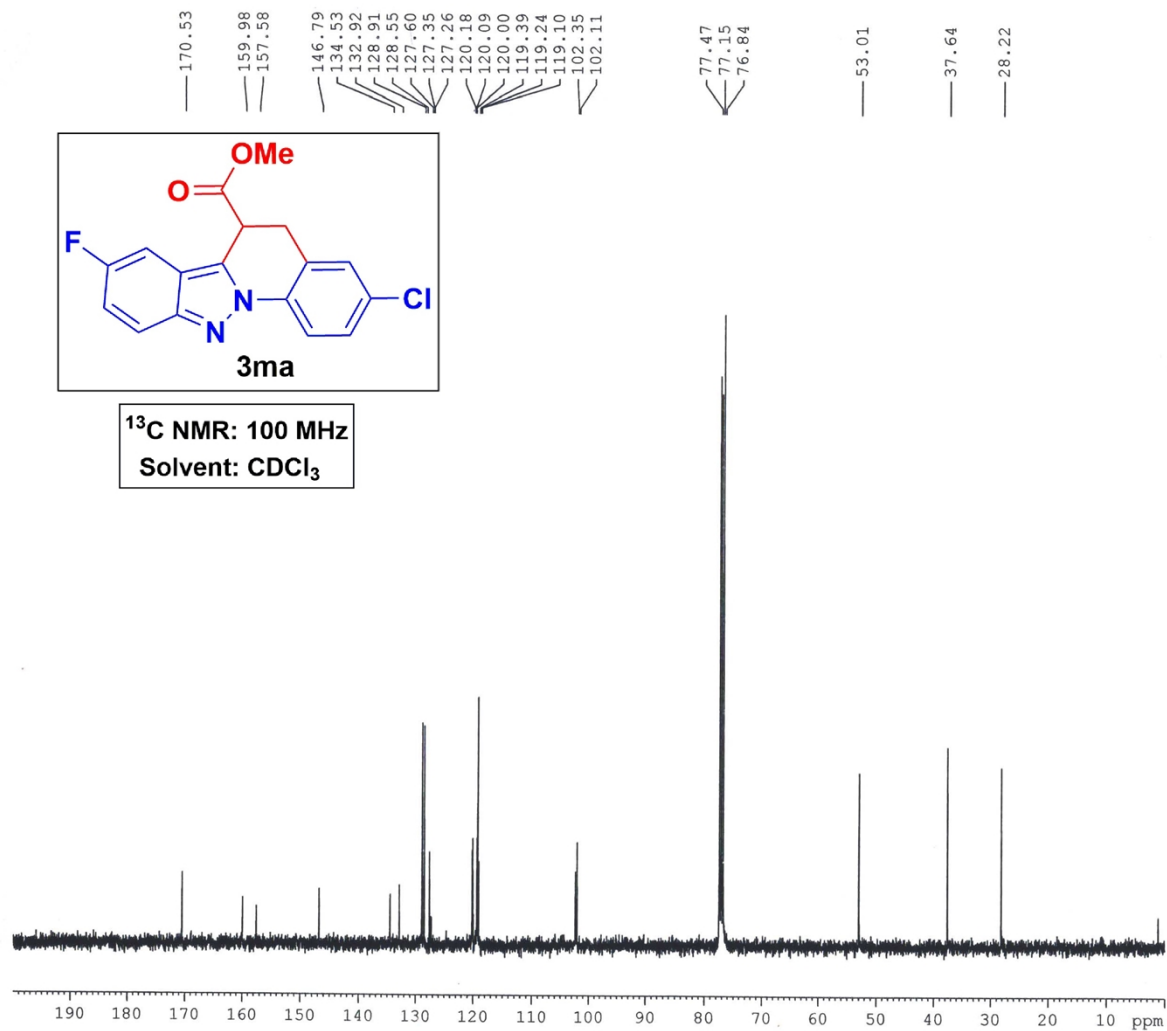

Current Data Parameters  
NAME Dr. A HAJRA-2024-13C  
EXPNO 30  
PROCNO 1

F2 - Acquisition Parameters  
Date 20240202  
Time 13.20  
INSTRUM spect  
PROBHD 5 mm PABBO BB/  
PULPROG zgpg30  
TD 32768  
SOLVENT CDCl3  
NS 340  
DS 2  
SWH 24038.461 Hz  
FIDRES 0.733596 Hz  
AQ 0.6815744 sec  
RG 186.42  
DW 20.800 usec  
DE 6.50 usec  
TE 290.4 K  
D1 2.00000000 sec  
D11 0.03000000 sec  
TD0 1

===== CHANNEL f1 =====  
SFO1 100.6278588 MHz  
NUC1 13C  
P1 8.90 usec  
PLW1 54.00000000 W

===== CHANNEL f2 =====  
SFO2 400.1516006 MHz  
NUC2 1H  
CPDPRG2 waltz16  
PCPD2 90.00 usec  
PLW2 12.00000000 W  
PLW12 0.32231000 W  
PLW13 0.16212000 W

F2 - Processing parameters  
SI 16384  
SF 100.6177881 MHz  
WDW EM  
SSB 0  
LB 1.00 Hz  
GB 0  
PC 1.40

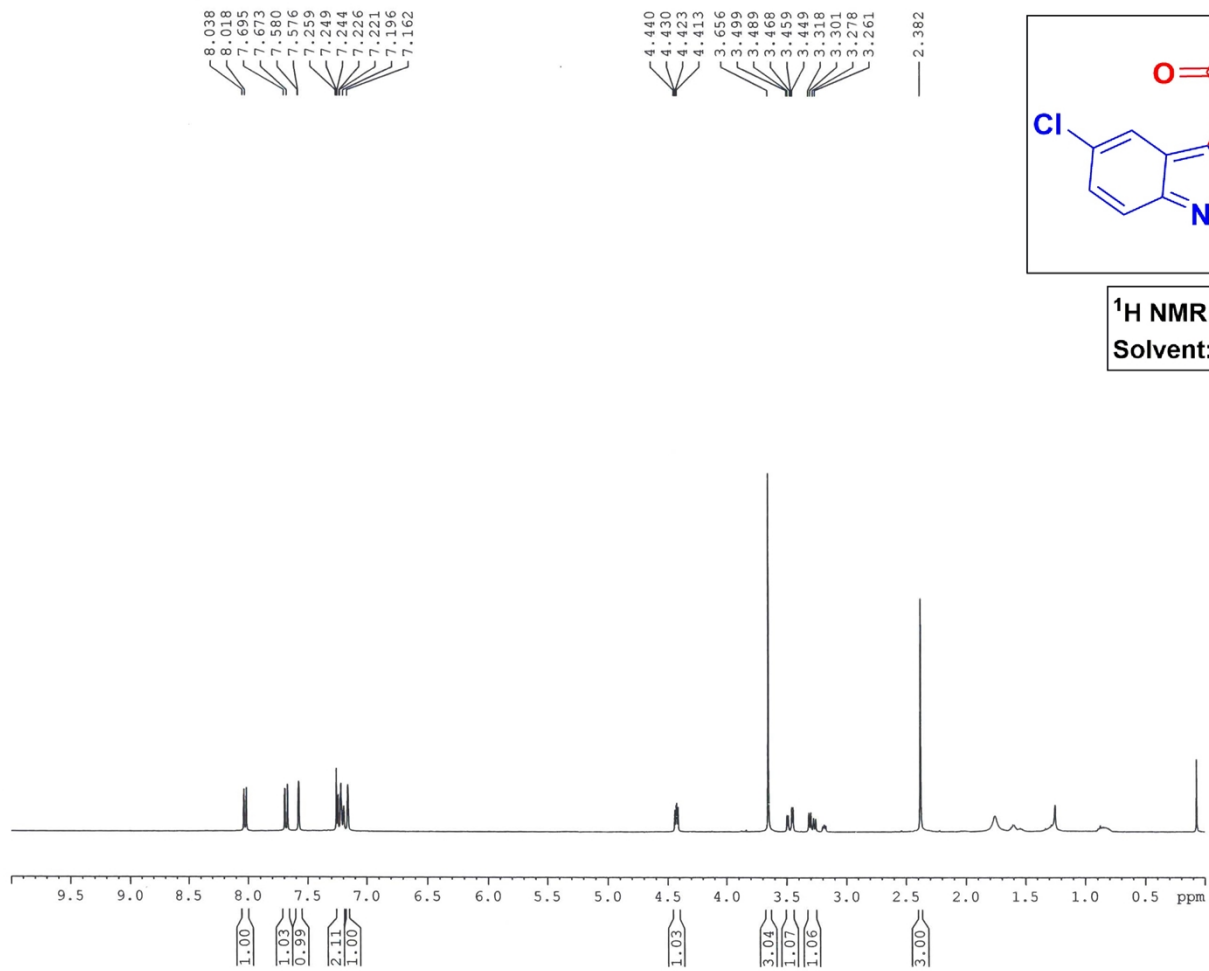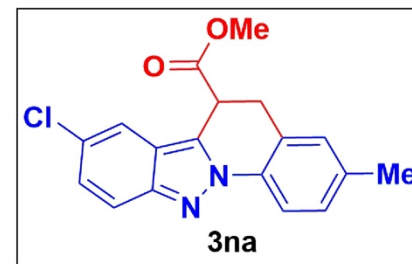

**<sup>1</sup>H NMR: 400 MHz**  
**Solvent: CDCl<sub>3</sub>**

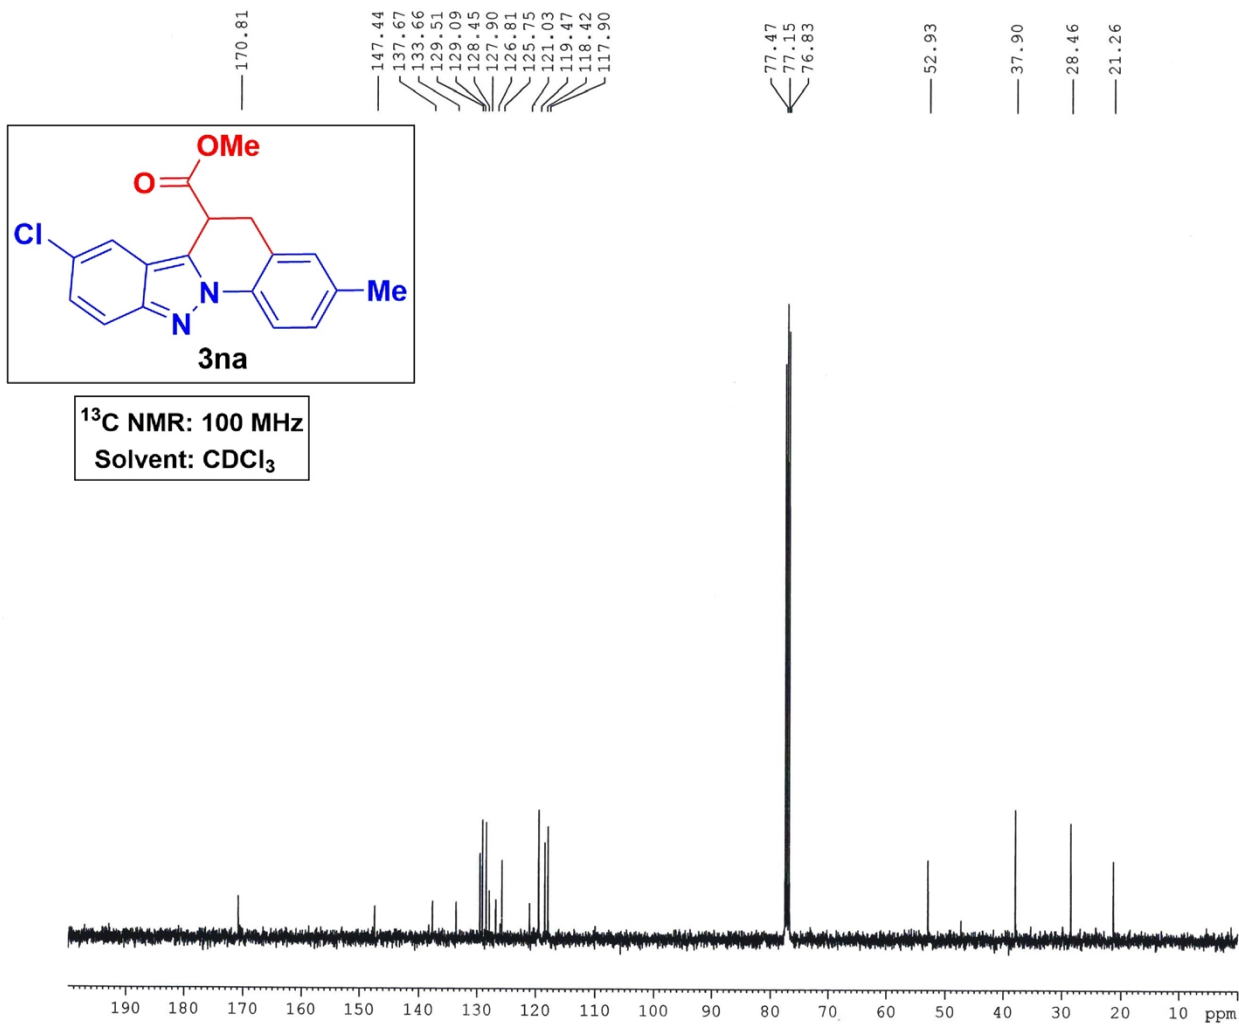

Current Data Parameters  
 NAME Dr. A HAJRA-2023-13C  
 EXPNO 388  
 PROCNO 1

F2 - Acquisition Parameters  
 Date\_ 20230926  
 Time\_ 12.29  
 INSTRUM spect  
 PROBHD 5 mm PABBO BB/  
 PULPROG zgpg30  
 TD 32768  
 SOLVENT CDCl3  
 NS 170  
 DS 2  
 SWH 24038.461 Hz  
 FIDRES 0.733596 Hz  
 AQ 0.6815744 sec  
 RG 186.42  
 DW 20.800 usec  
 DE 6.50 usec  
 TE 297.1 K  
 D1 2.0000000 sec  
 D11 0.0300000 sec  
 TDO 1

===== CHANNEL f1 =====  
 SFO1 100.6278588 MHz  
 NUC1 13C  
 P1 8.90 usec  
 PLW1 54.0000000 W

===== CHANNEL f2 =====  
 SFO2 400.1516006 MHz  
 NUC2 1H  
 CPDPRG2 waltz16  
 PCPD2 90.00 usec  
 PLW2 12.0000000 W  
 PLW12 0.32231000 W  
 PLW13 0.16212000 W

F2 - Processing parameters  
 SI 16384  
 SF 100.6177858 MHz  
 WDW EM  
 SSB 0  
 LB 1.00 Hz  
 GB 0  
 PC 1.40

8.078  
8.056  
7.688  
7.665  
7.580  
7.576  
7.260  
7.245  
7.241  
7.222  
7.218  
6.938  
6.931  
6.916  
6.909  
6.889  
6.883

4.447  
4.437  
4.430  
4.420  
3.856  
3.657  
3.509  
3.499  
3.469  
3.459  
3.333  
3.316  
3.293  
3.276

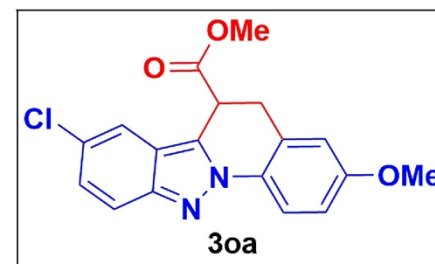

<sup>1</sup>H NMR: 400 MHz  
Solvent: CDCl<sub>3</sub>

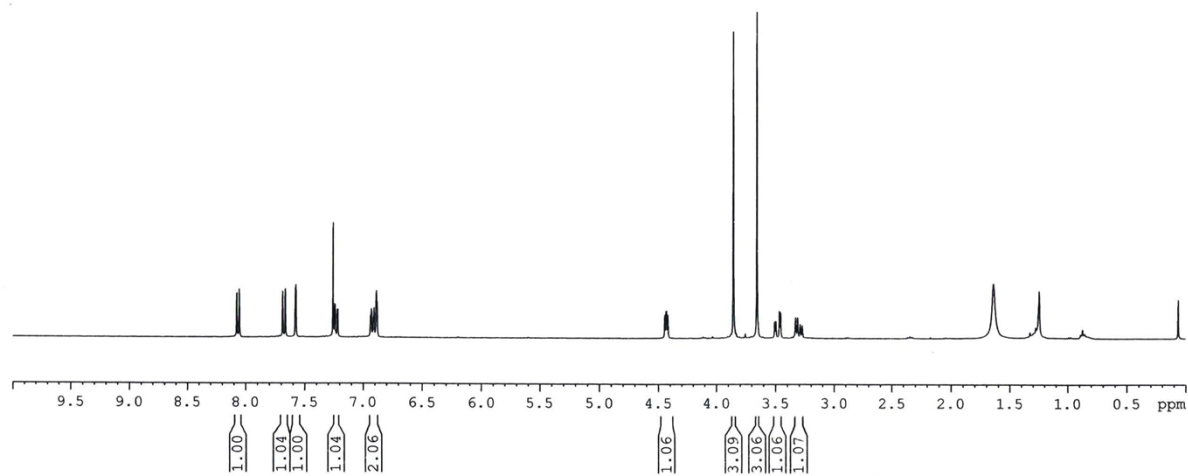

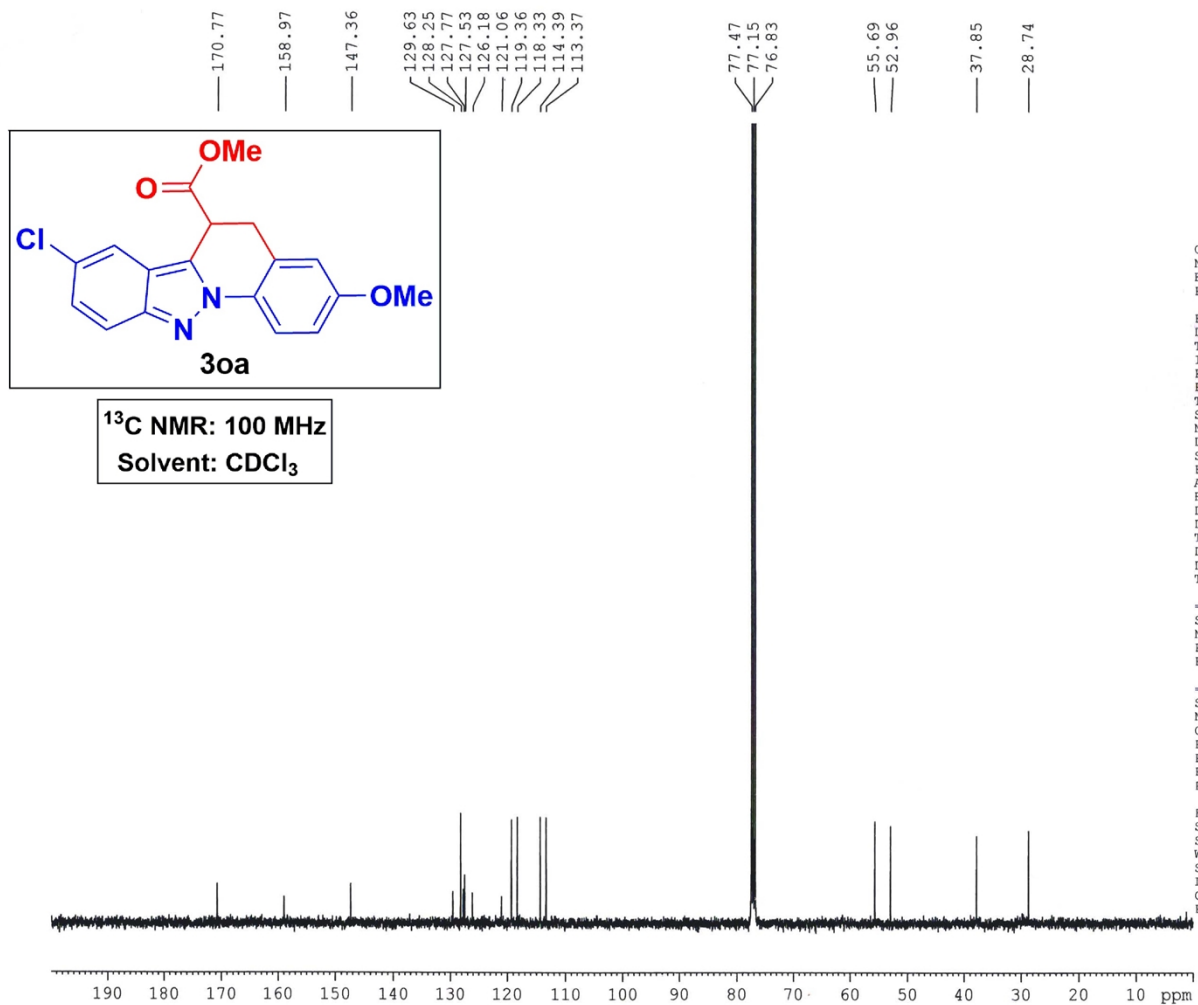

Current Data Parameters  
 NAME Dr. A HAJRA-2023-13C  
 EXPNO 352  
 PROCNO 1

F2 - Acquisition Parameters  
 Date 20230907  
 Time 18.27  
 INSTRUM spect  
 PROBHD 5 mm PABBO BB/  
 PULPROG zgpg30  
 TD 32768  
 SOLVENT CDCl3  
 NS 1024  
 DS 2  
 SWH 24038.461 Hz  
 FIDRES 0.733596 Hz  
 AQ 0.6815744 sec  
 RG 186.42  
 DW 20.800 usec  
 DE 6.50 usec  
 TE 294.9 K  
 D1 2.00000000 sec  
 D11 0.03000000 sec  
 TD0 1

===== CHANNEL f1 =====  
 SFO1 100.6278588 MHz  
 NUC1 13C  
 P1 8.90 usec  
 PLW1 54.00000000 W

===== CHANNEL f2 =====  
 SFO2 400.1516006 MHz  
 NUC2 1H  
 CPDPRG[2] waltz16  
 PCPD2 90.00 usec  
 PLW2 12.00000000 W  
 PLW12 0.32231000 W  
 PLW13 0.16212000 W

F2 - Processing parameters  
 SI 16384  
 SF 100.6177859 MHz  
 WDW EM  
 SSB 0  
 LB 1.00 Hz  
 GB 0  
 PC 1.40

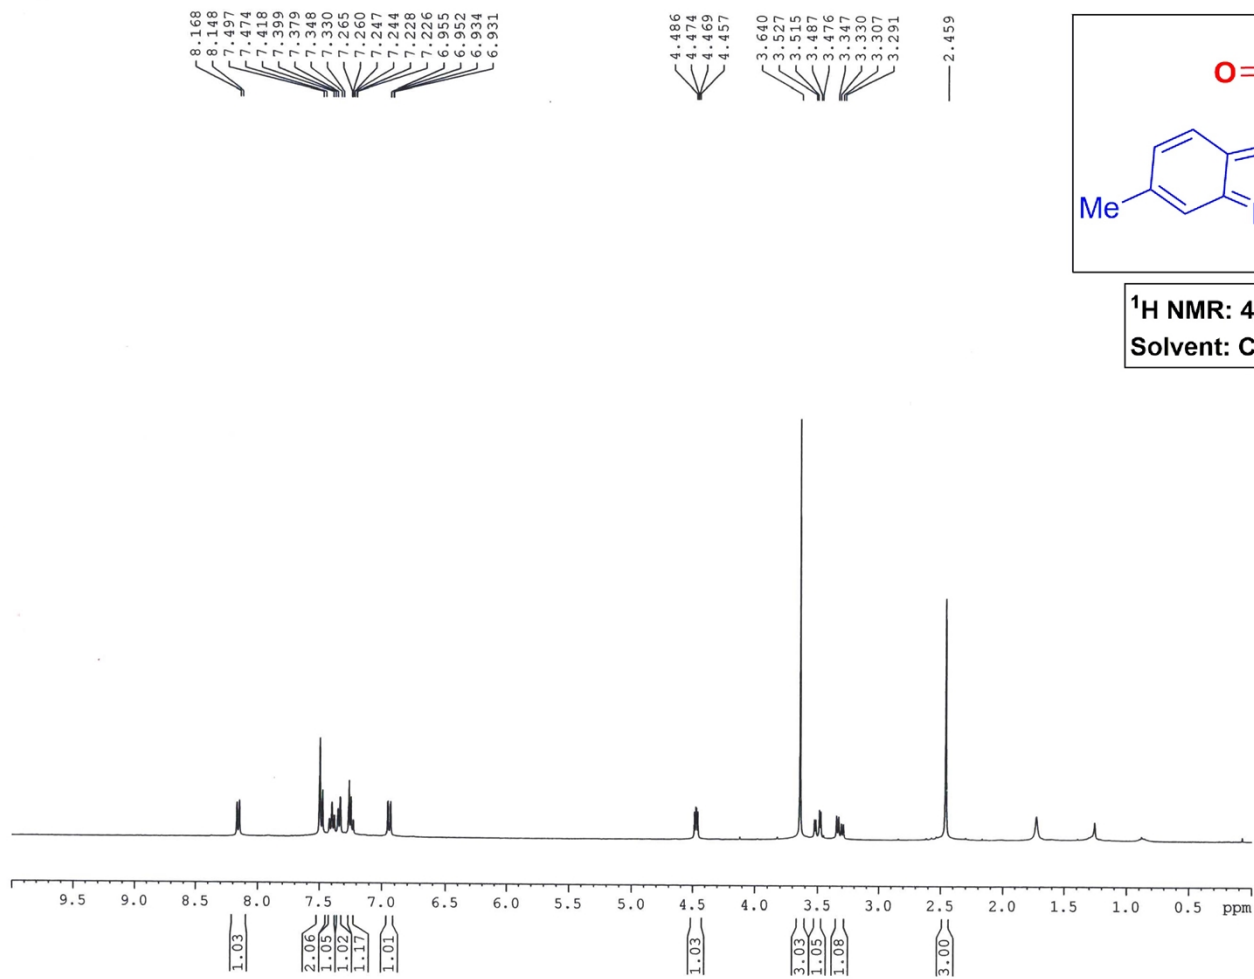

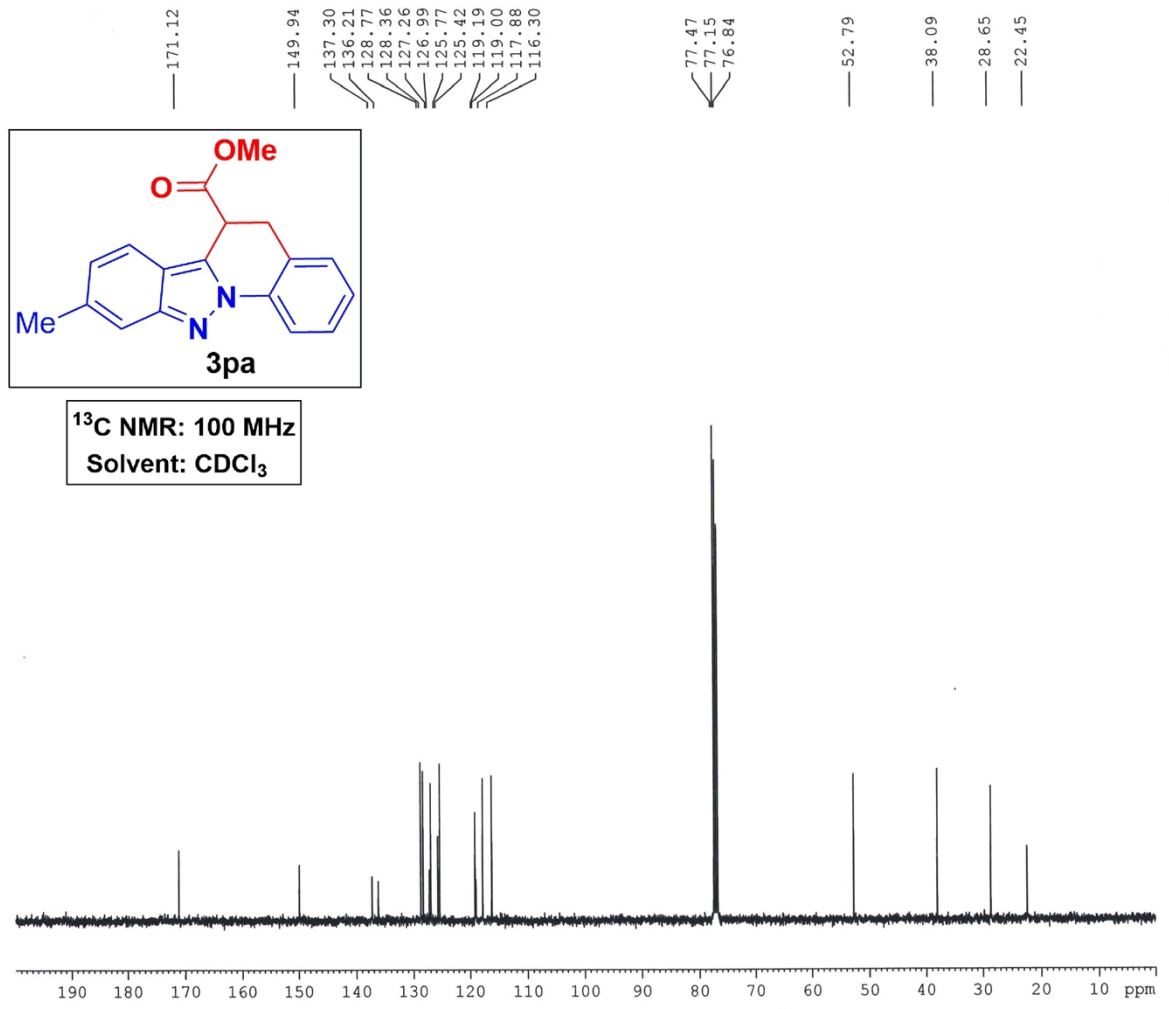

```

Current Data Parameters
NAME      Dr. A HAJRA-2023-13C
EXPNO     418
PROCNO    1

F2 - Acquisition Parameters
Date_     20231103
Time      9.33
INSTRUM   spect
PROBHD    5 mm PABBO BB/
PULPROG   zgpg30
TD         32768
SOLVENT   CDCl3
NS         280
DS         2
SWH        24038.461 Hz
FIDRES     0.733596 Hz
AQ         0.6815744 sec
RG         186.42
DW         20.800 usec
DE         6.50 usec
TE         293.8 K
D1         2.00000000 sec
D11        0.03000000 sec
TD0        1

----- CHANNEL f1 -----
SFO1      100.6278588 MHz
NUC1       13C
P1         8.90 usec
PLW1       54.00000000 W

----- CHANNEL f2 -----
SFO2      400.1516006 MHz
NUC2       1H
CPDPRG[2] waltz16
PCPD2      90.00 usec
PLW2       12.00000000 W
PLW12      0.32231000 W
PLW13      0.16212000 W

F2 - Processing parameters
SI         16384
SF         100.6177873 MHz
WDW        EM
SSB        0
LB         1.00 Hz
GB         0
PC         1.40
  
```



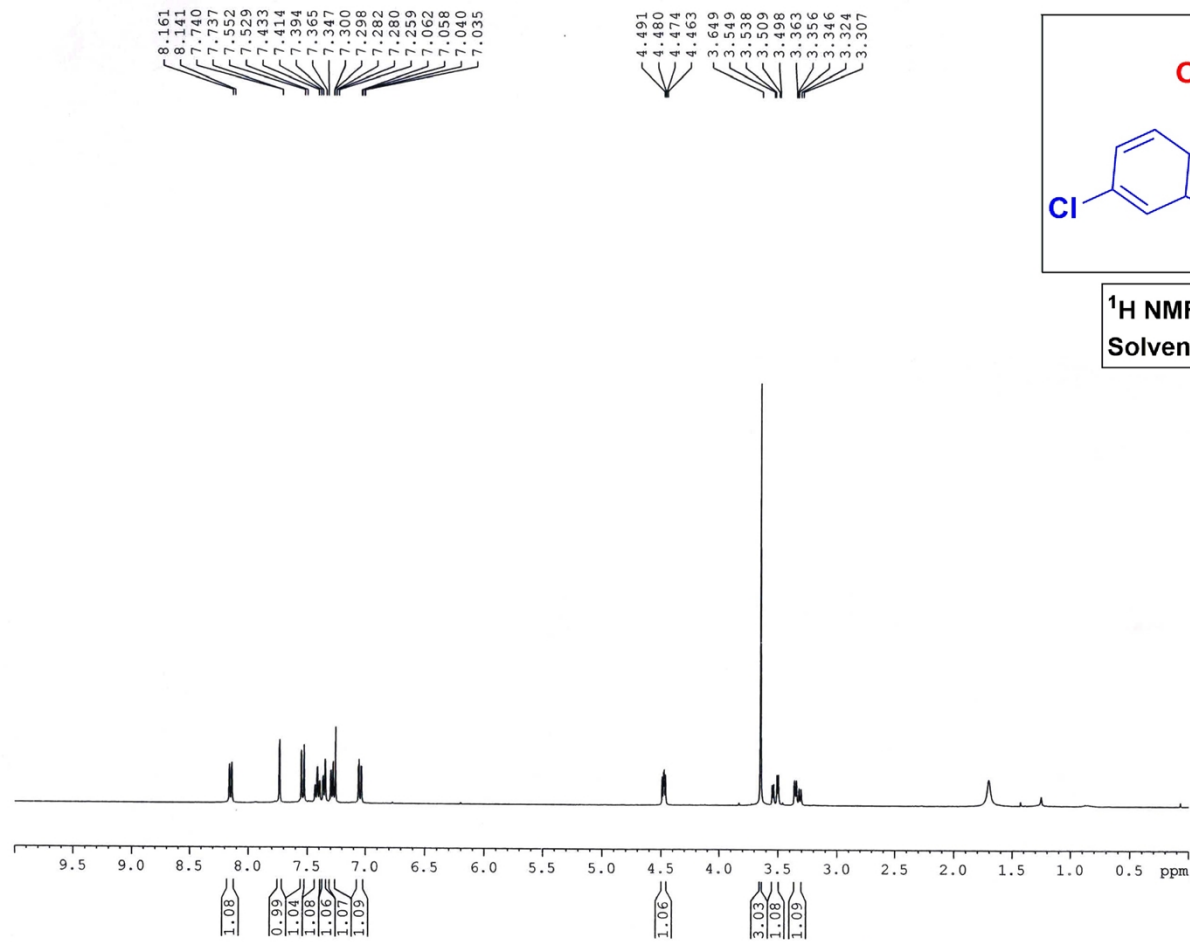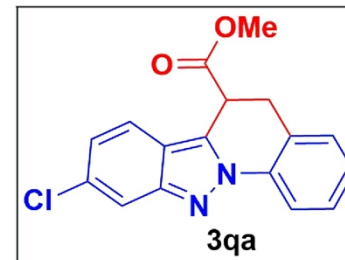

<sup>1</sup>H NMR: 400 MHz  
Solvent: CDCl<sub>3</sub>

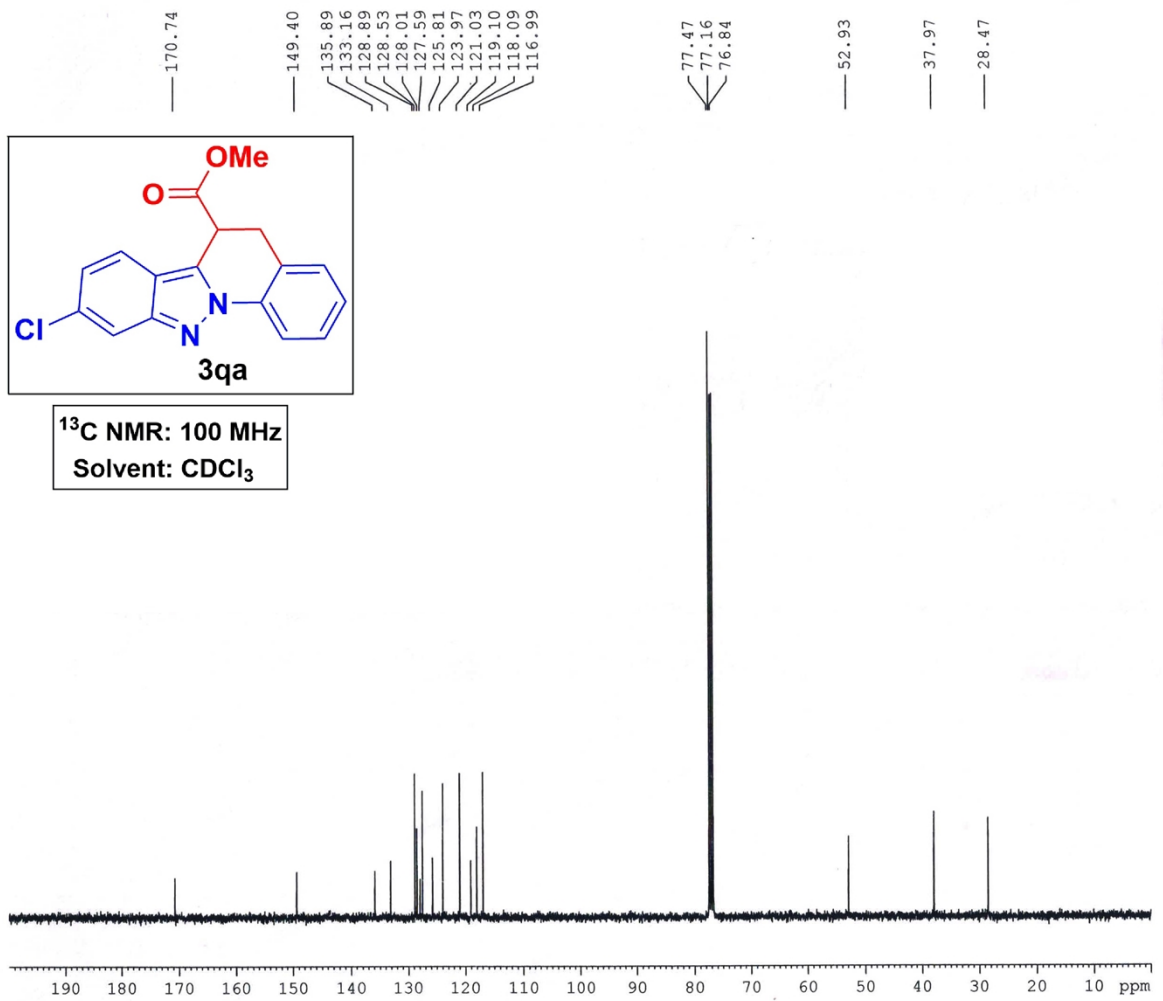

```

Current Data Parameters
NAME      Dr. A HAJRA-2023-13C
EXPNO     359
PROCNO    1

F2 - Acquisition Parameters
Date_     20230914
Time      10.24
INSTRUM   spect
PROBHD    5 mm PABBO BB/
FULPROG   zgpg30
TD         32768
SOLVENT   CDC13
NS         520
DS         2
SWH        24038.461 Hz
FIDRES     0.733596 Hz
AQ         0.6815744 sec
RG         186.42
DW         20.800 usec
DE         6.50 usec
TE         295.1 K
D1         2.00000000 sec
D11        0.03000000 sec
TDO        1

----- CHANNEL f1 -----
SFO1      100.6278588 MHz
NUC1       13C
P1         8.90 usec
PLW1       54.00000000 W

----- CHANNEL f2 -----
SFO2      400.1516006 MHz
NUC2        1H
CPDPRG2    waltz16
PCPD2      90.00 usec
PLW2       12.00000000 W
PLW2       0.32231000 W
PLW3       0.16212000 W

F2 - Processing parameters
SI         16384
SF         100.6177858 MHz
WDW        EM
SSB        0
LB         1.00 Hz
GB         0
PC         1.40

```

8.134  
8.114  
7.662  
7.639  
7.412  
7.394  
7.374  
7.347  
7.328  
7.259  
7.239  
7.221  
7.039  
7.033  
7.016  
7.010  
6.773  
6.768

4.467  
4.457  
4.451  
4.440  
3.861  
3.643  
3.526  
3.516  
3.487  
3.477  
3.356  
3.339  
3.317  
3.300

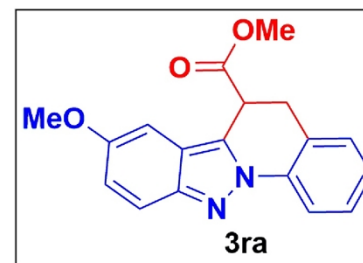

$^1\text{H}$  NMR: 400 MHz  
Solvent:  $\text{CDCl}_3$

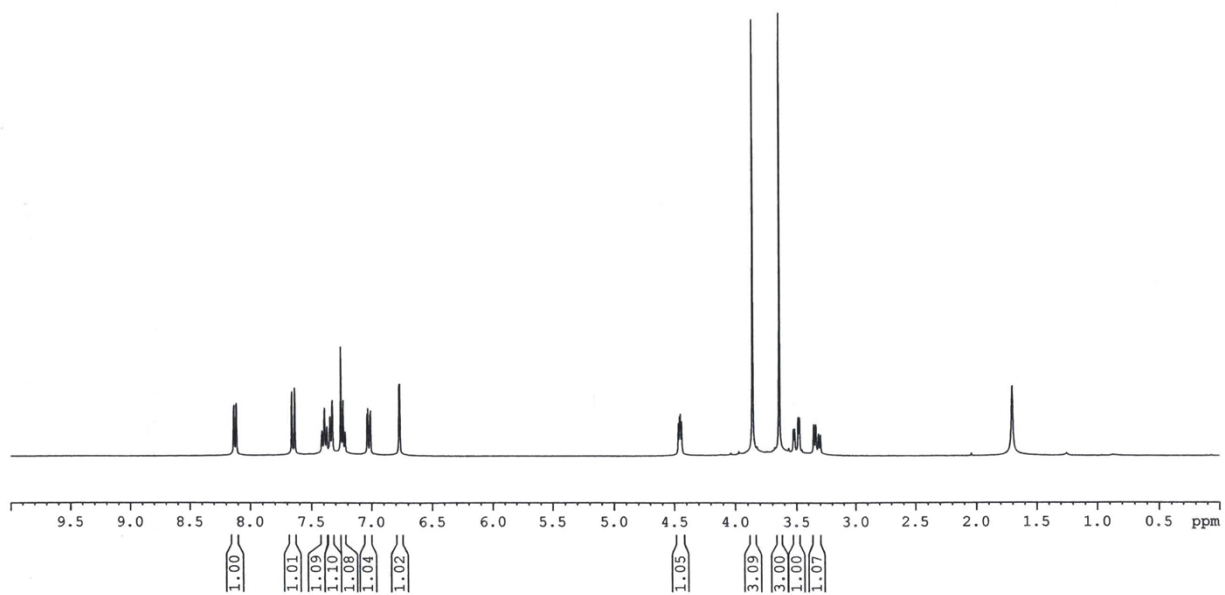

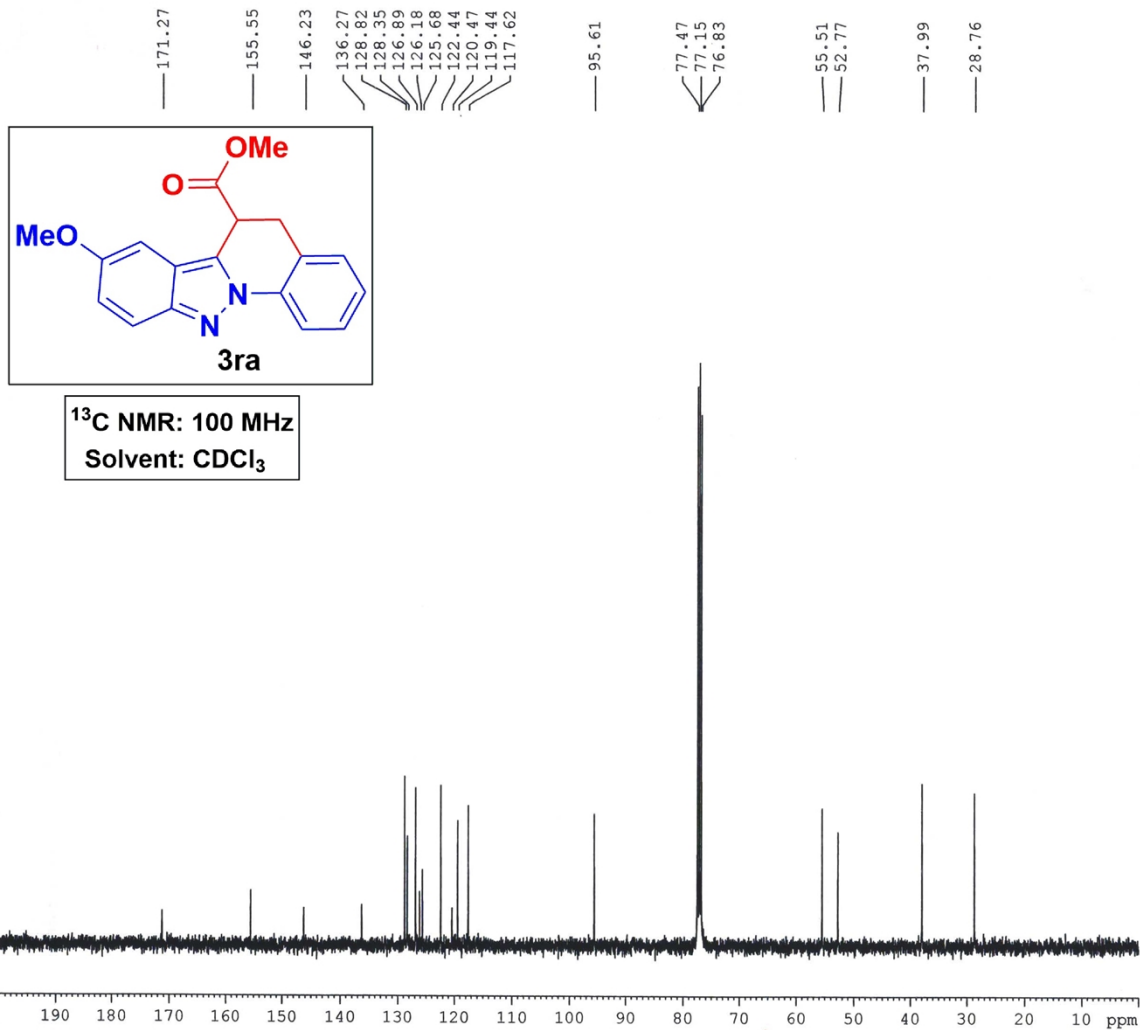

Current Data Parameters  
NAME Dr. A HAJRA-2024-13C  
EXPNO 29  
PROCNO 1

F2 - Acquisition Parameters  
Date\_ 20240201  
Time\_ 17.08  
INSTRUM spect  
PROBHD 5 mm FAPBO BB/  
PULPROG zgpg30  
TD 32768  
SOLVENT CDCl3  
NS 320  
DS 2  
SWH 24038.461 Hz  
FIDRES 0.733596 Hz  
AQ 0.6815744 sec  
RG 186.42  
DW 20.800 usec  
DE 6.50 usec  
TE 292.5 K  
D1 2.0000000 sec  
D11 0.0300000 sec  
TDO 1

===== CHANNEL f1 =====  
SFO1 100.6278588 MHz  
NUC1 13C  
P1 8.90 usec  
PLW1 54.00000000 W

===== CHANNEL f2 =====  
SFO2 400.1516006 MHz  
NUC2 1H  
CFPRG[2] waltz16  
PCPD2 90.00 usec  
PLW2 12.00000000 W  
PLW12 0.32231000 W  
PLW13 0.16212000 W

F2 - Processing parameters  
SI 16384  
SF 100.6177873 MHz  
WDW EM  
SSB 0  
LB 1.00 Hz  
GB 0  
PC 1.40

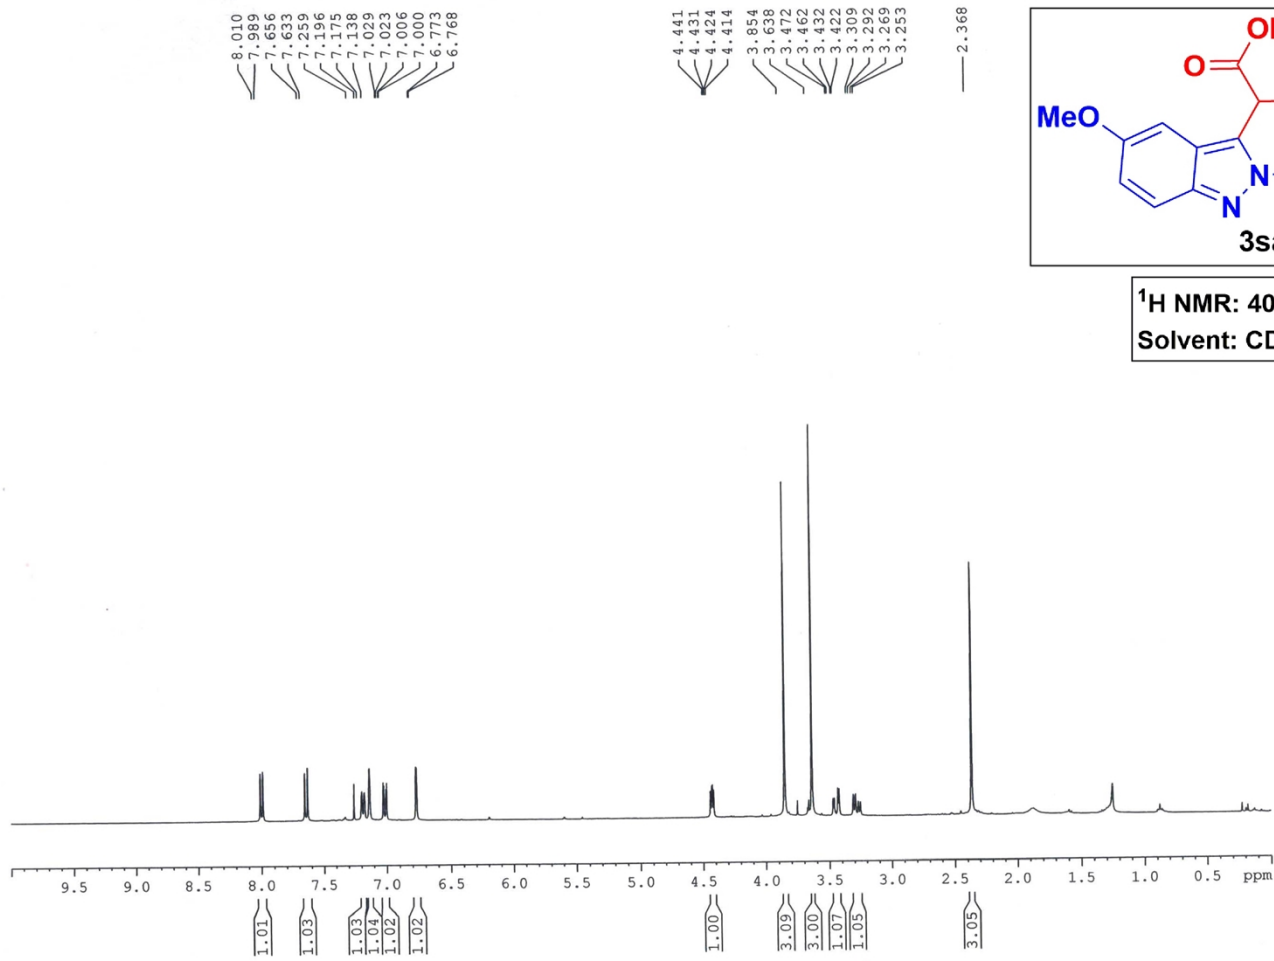

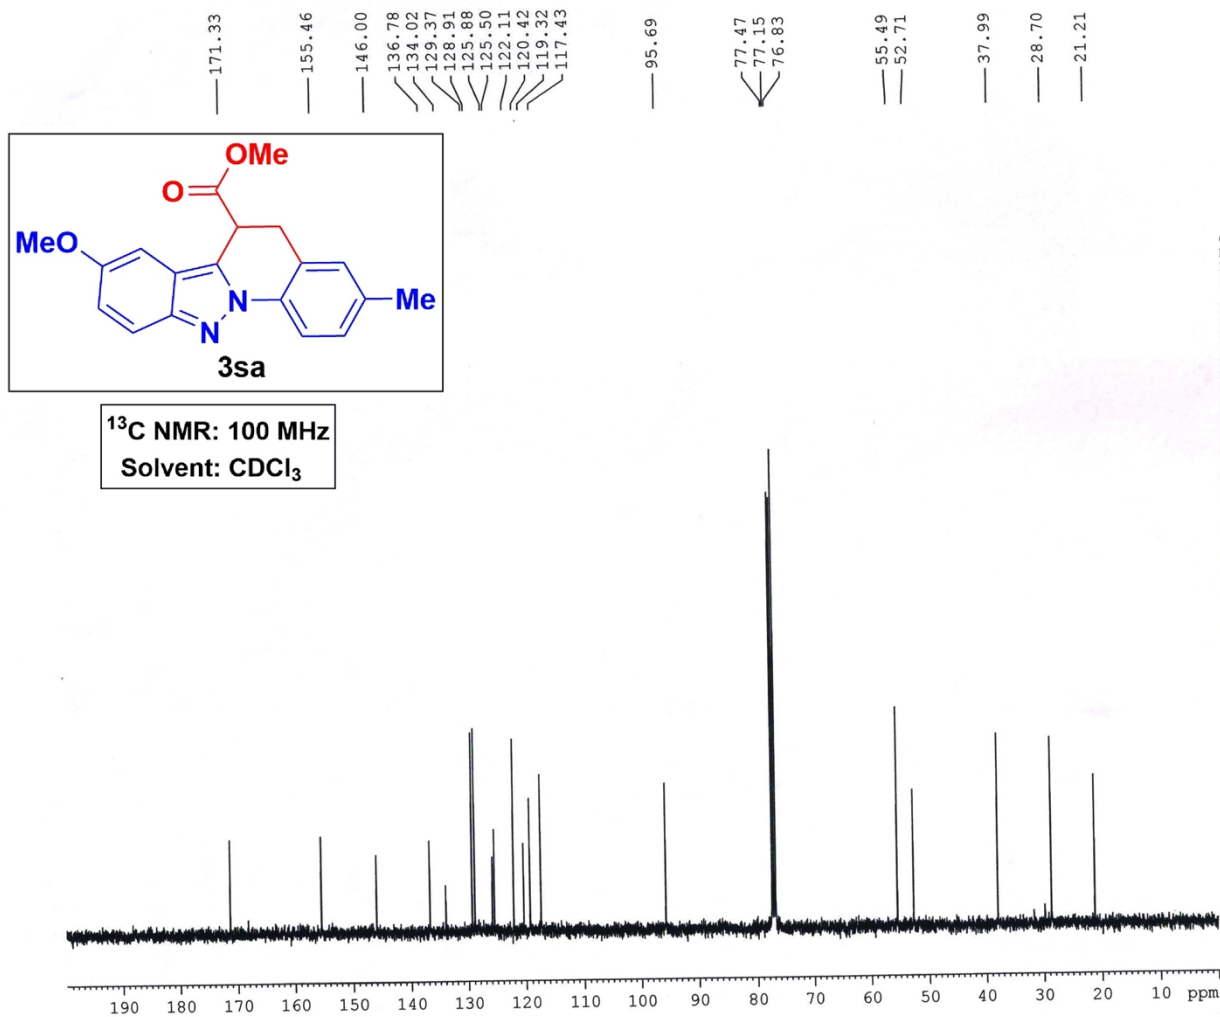

Current Data Parameters  
 NAME Dr. A HAJRA-2023-13C  
 EXPNO 429  
 PROCNO 1

F2 - Acquisition Parameters  
 Date\_ 20231107  
 Time 17.31  
 INSTRUM spect  
 PROBHD 5 mm PABBO BB/  
 PULPROG zgpg30  
 TD 32768  
 SOLVENT CDCl3  
 NS 180  
 DS 2  
 SWH 24038.461 Hz  
 FIDRES 0.733596 Hz  
 AQ 0.6815744 sec  
 RG 186.42  
 DW 20.800 usec  
 DE 6.50 usec  
 TE 295.6 K  
 D1 2.0000000 sec  
 D11 0.0300000 sec  
 TDO 1

===== CHANNEL f1 =====  
 SFO1 100.6278588 MHz  
 NUC1 13C  
 P1 8.90 usec  
 PLW1 54.00000000 W

===== CHANNEL f2 =====  
 SFO2 400.1516006 MHz  
 NUC2 1H  
 CPDPRG2 waltz16  
 ECPD2 90.00 usec  
 PLW2 12.00000000 W  
 ELW12 0.32231000 W  
 PLW13 0.16212000 W

F2 - Processing parameters  
 SI 16384  
 SF 100.6177883 MHz  
 WDW EM  
 SSB 0  
 LB 1.00 Hz  
 GB 0  
 PC 1.40

7.741  
7.729  
7.723  
7.721  
7.707  
7.611  
7.593  
7.572  
7.325  
7.317  
7.307  
7.305  
7.302  
7.294  
7.288  
7.286  
7.259  
7.114  
7.098  
7.095  
7.077  
6.799  
6.023  
6.019  
6.008  
6.004

4.460  
4.449  
4.443  
4.433

3.647  
3.438  
3.428  
3.399  
3.388  
3.269  
3.252  
3.229  
3.212

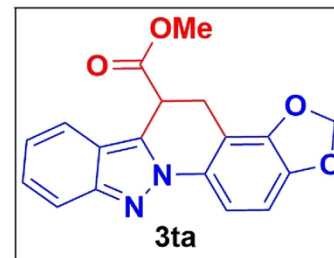

**<sup>1</sup>H NMR: 400 MHz**  
**Solvent: CDCl<sub>3</sub>**

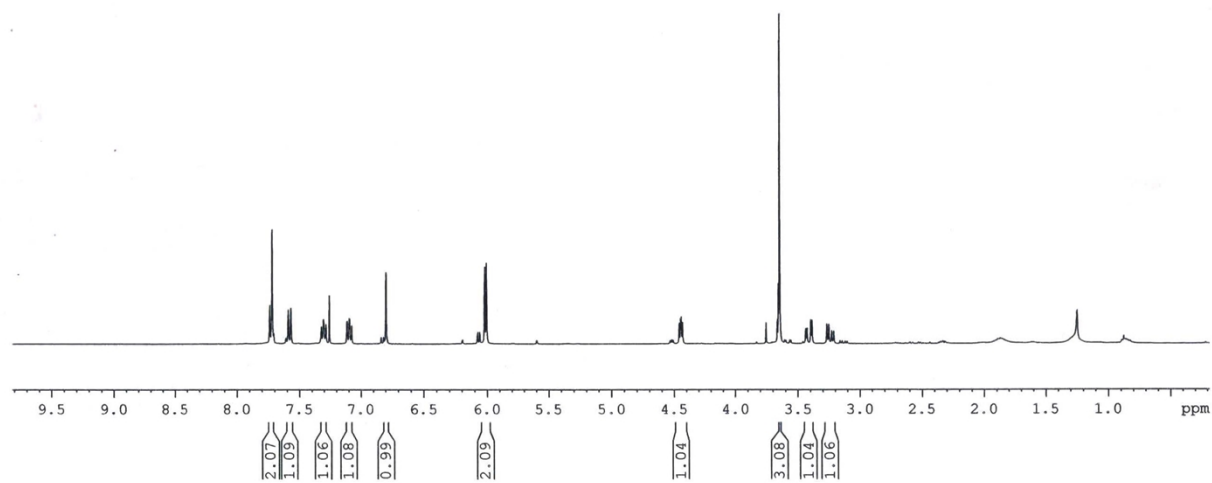

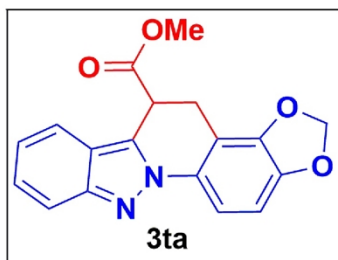

**<sup>13</sup>C NMR: 100 MHz**  
**Solvent: CDCl<sub>3</sub>**

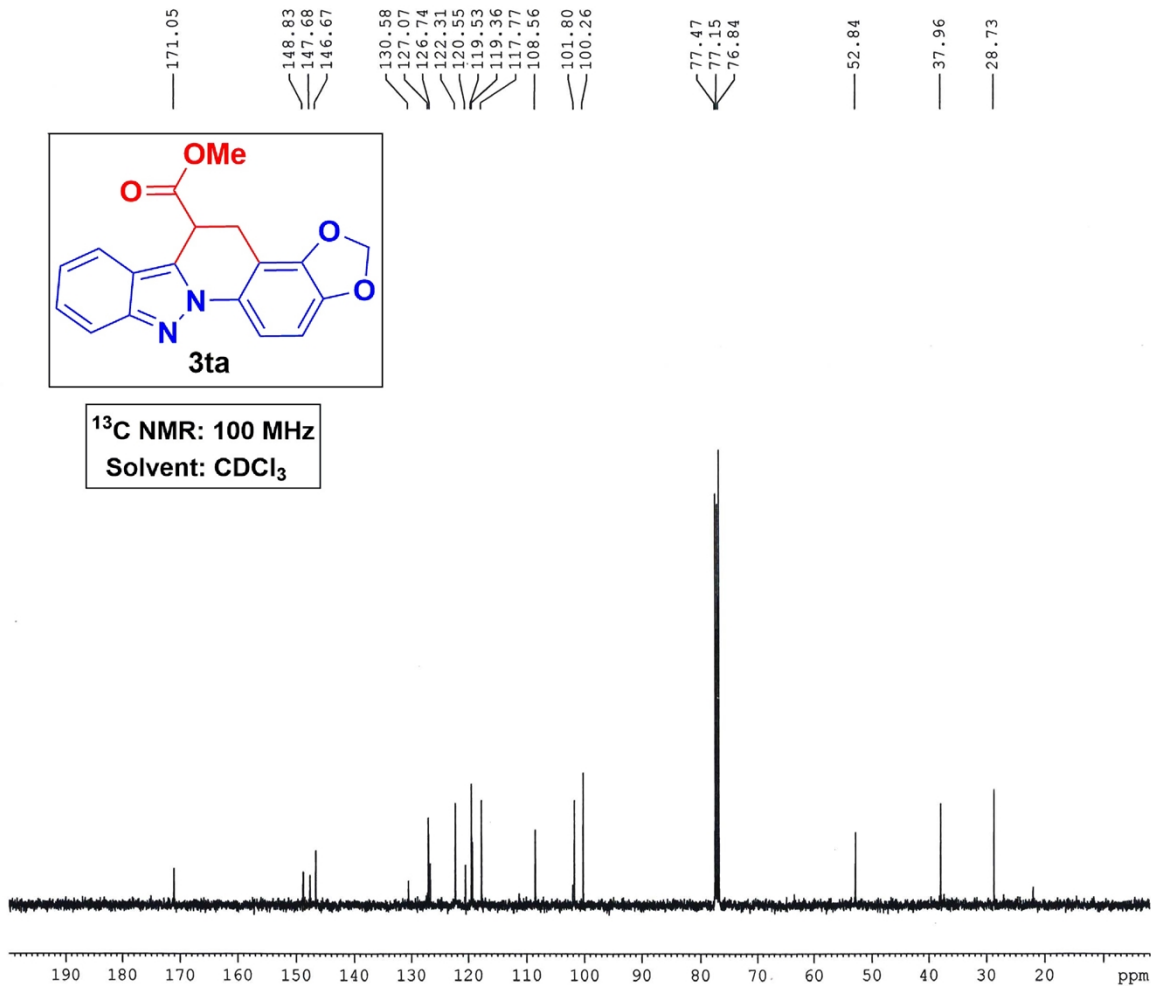

Current Data Parameters  
 NAME Dr. A HAJRA-2023-13C  
 EXPNO 447  
 PROCNO 1

F2 - Acquisition Parameters  
 Date\_ 20231209  
 Time 16.47  
 INSTRUM spect  
 PROBHD 5 mm PABBO BB/  
 PULPROG zgpg30  
 TD 32768  
 SOLVENT CDCl3  
 NS 190  
 DS 2  
 SWH 24038.461 Hz  
 FIDRES 0.733596 Hz  
 AQ 0.6815744 sec  
 RG 186.42  
 DW 20.800 usec  
 DE 6.50 usec  
 TE 291.5 K  
 D1 2.0000000 sec  
 D11 0.03000000 sec  
 TDO 1

===== CHANNEL f1 =====  
 SFO1 100.6278588 MHz  
 NUC1 13C  
 P1 8.90 usec  
 PLW1 54.0000000 W

===== CHANNEL f2 =====  
 SFO2 400.1516006 MHz  
 NUC2 1H  
 CPDPRG[2] waltz16  
 PCPD2 90.00 usec  
 PLW2 12.0000000 W  
 PLW12 0.32231000 W  
 PLW13 0.16212000 W

F2 - Processing parameters  
 SI 16384  
 SF 100.6177881 MHz  
 WDW EM  
 SSB 0  
 LB 1.00 Hz  
 GB 0  
 PC 1.40



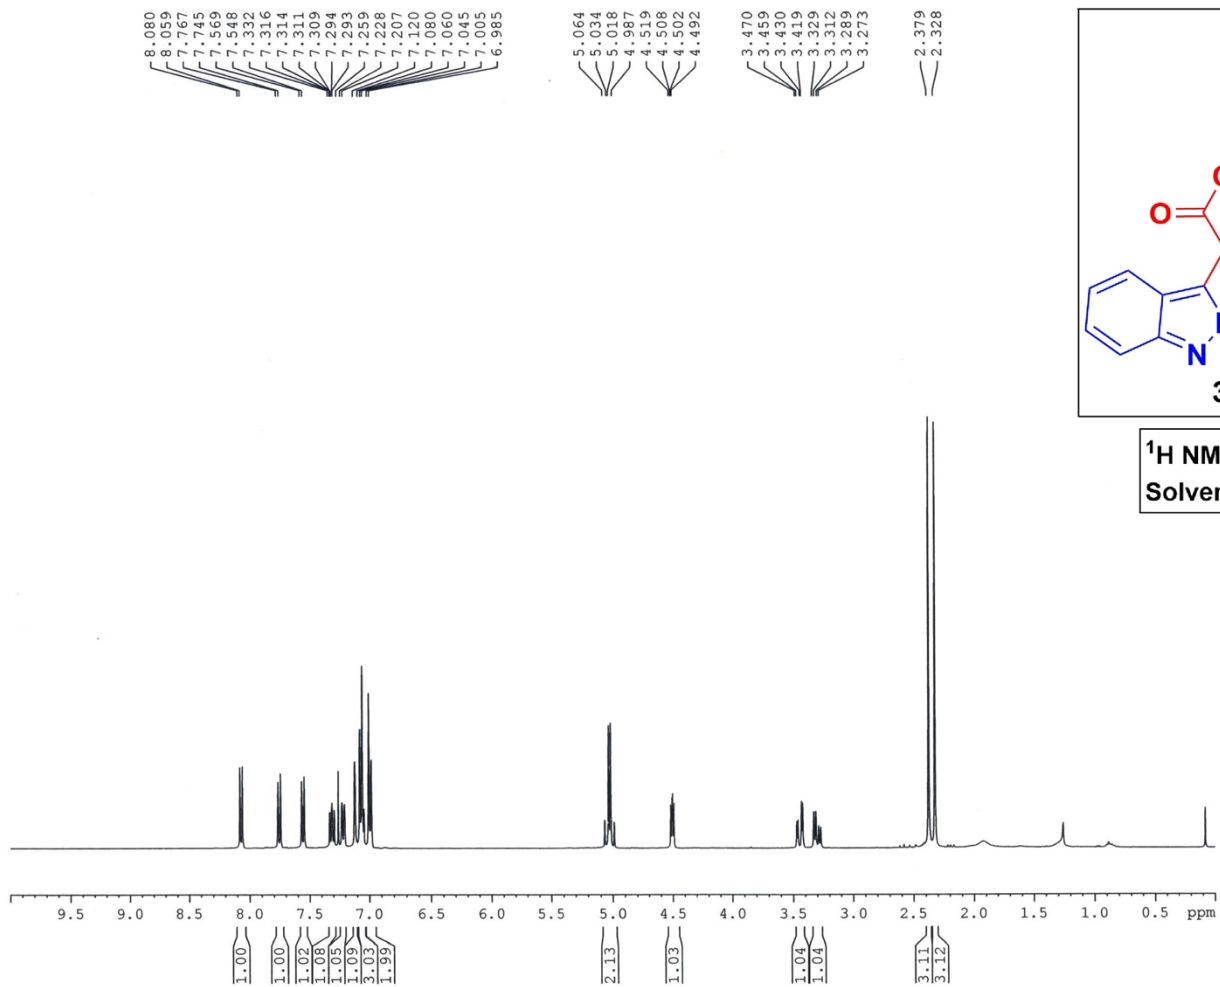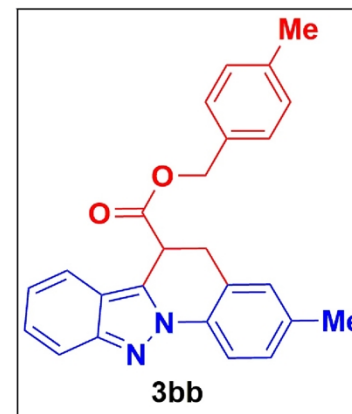

<sup>1</sup>H NMR: 400 MHz  
Solvent: CDCl<sub>3</sub>

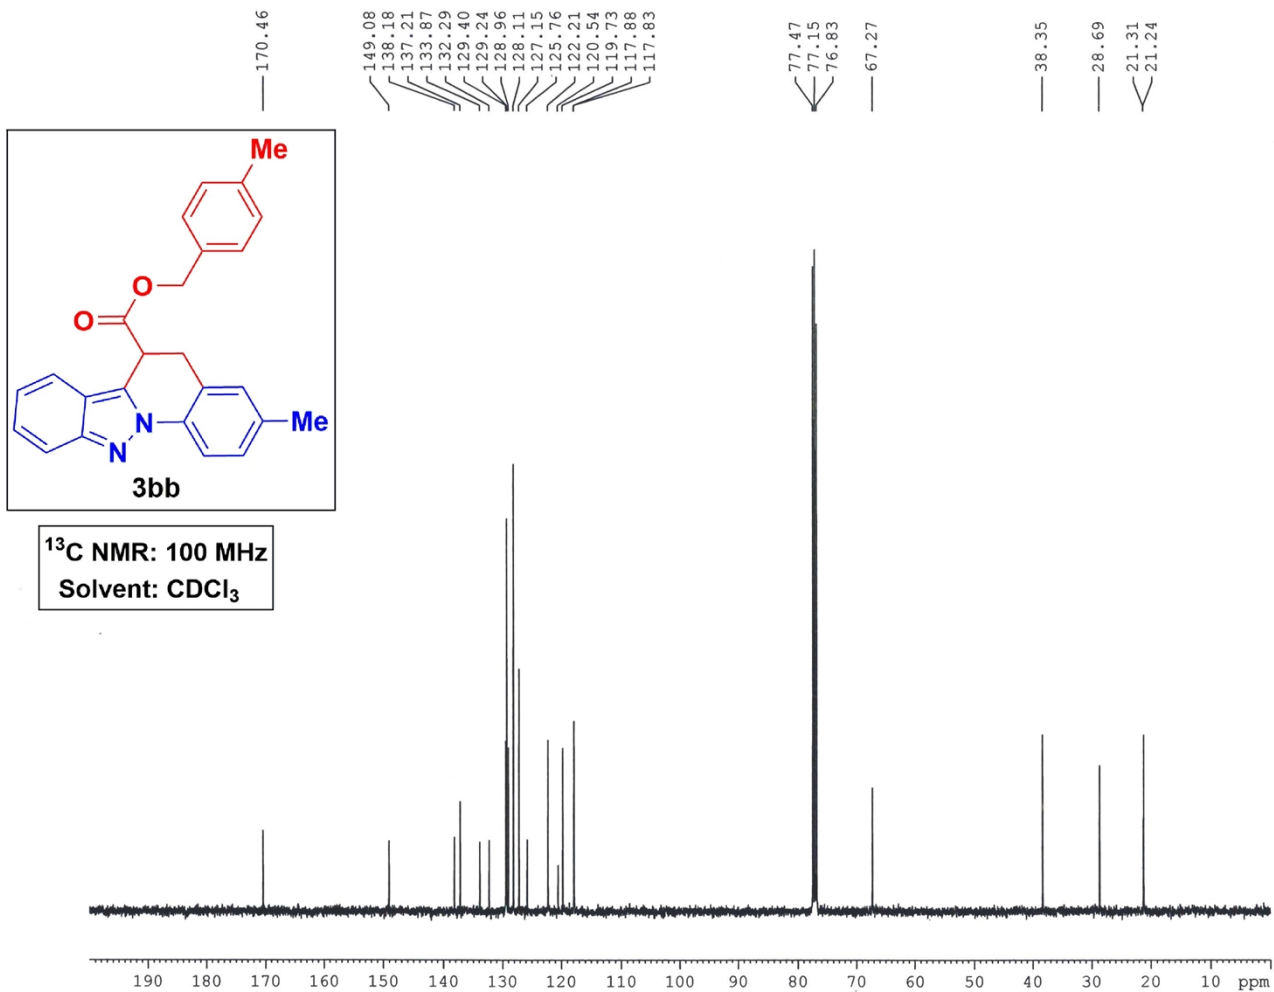

Current Data Parameters  
 NAME Dr. A HAJRA-2023-13C  
 EXPNO 456  
 PROCNO 1

F2 - Acquisition Parameters  
 Date\_ 20231224  
 Time\_ 12.07  
 INSTRUM spect  
 PROBHD 5 mm PABBO BB/  
 PULPROG zgpg30  
 TD 32768  
 SOLVENT CDCl3  
 NS 520  
 DS 2  
 SWH 24038.461 Hz  
 FIDRES 0.733596 Hz  
 AQ 0.6815744 sec  
 RG 186.42  
 DW 20.800 usec  
 DE 6.50 usec  
 TE 292.0 K  
 D1 2.00000000 sec  
 D11 0.03000000 sec  
 TD0 1

===== CHANNEL f1 =====  
 SFO1 100.6278588 MHz  
 NUC1 13C  
 P1 8.90 usec  
 PLW1 54.00000000 W

===== CHANNEL f2 =====  
 SFO2 400.1516006 MHz  
 NUC2 1H  
 CPDPRG2 waltz16  
 PCPD2 90.00 usec  
 PLW2 12.00000000 W  
 PLW12 0.32231000 W  
 PLW13 0.16212000 W

F2 - Processing parameters  
 SI 16384  
 SF 100.6177889 MHz  
 WDW EM  
 SSB 0  
 LB 1.00 Hz  
 GB 0  
 PC 1.40

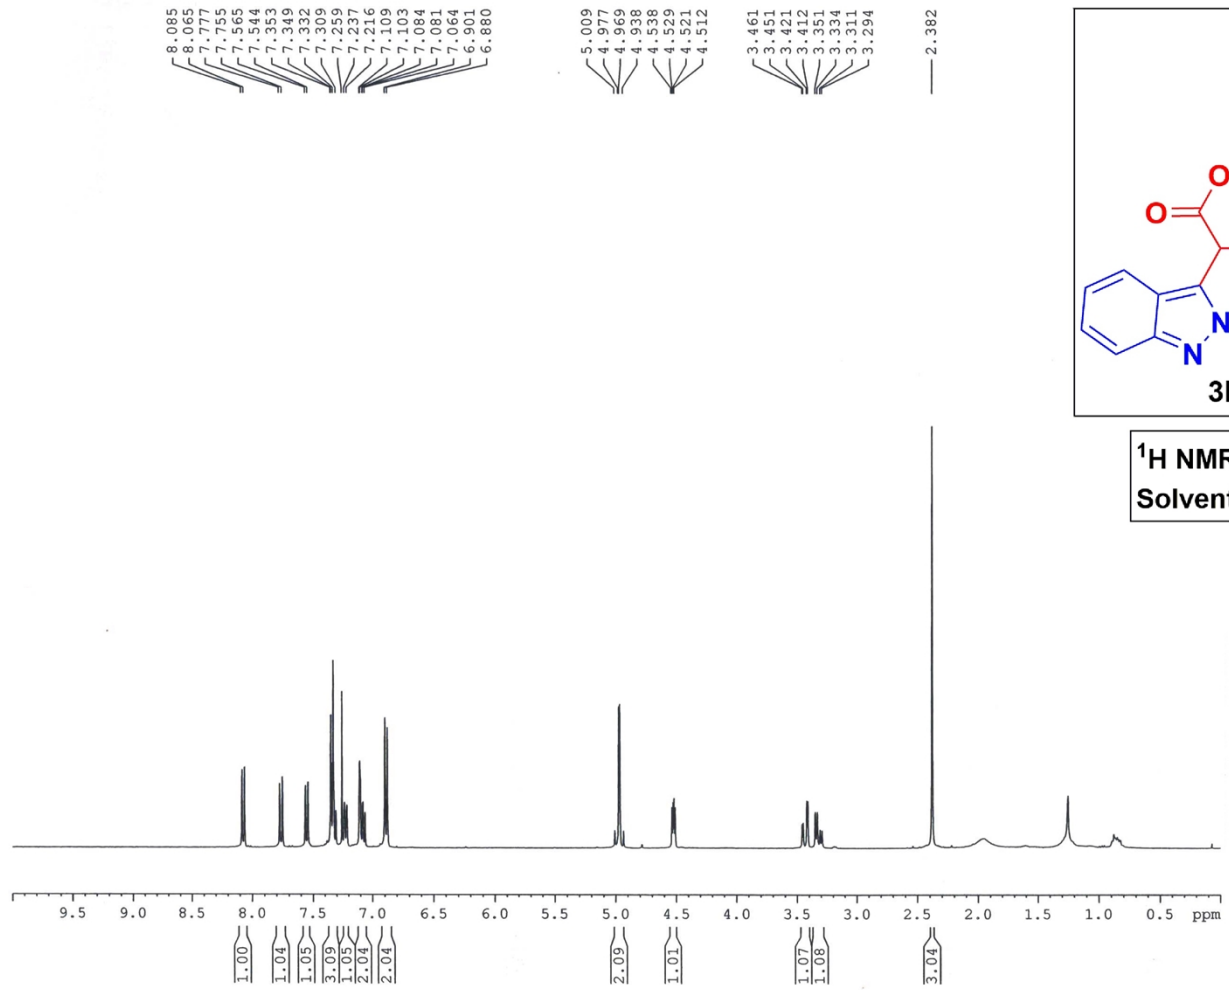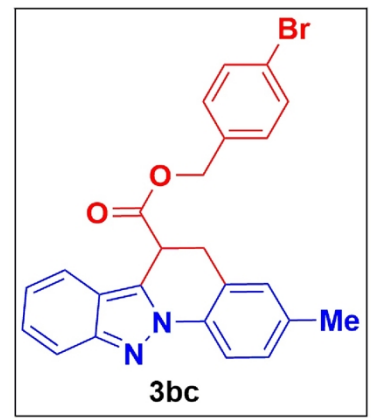

**<sup>1</sup>H NMR: 400 MHz  
Solvent: CDCl<sub>3</sub>**

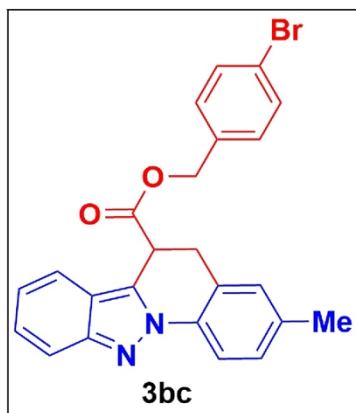

**<sup>13</sup>C NMR: 100 MHz**  
**Solvent: CDCl<sub>3</sub>**

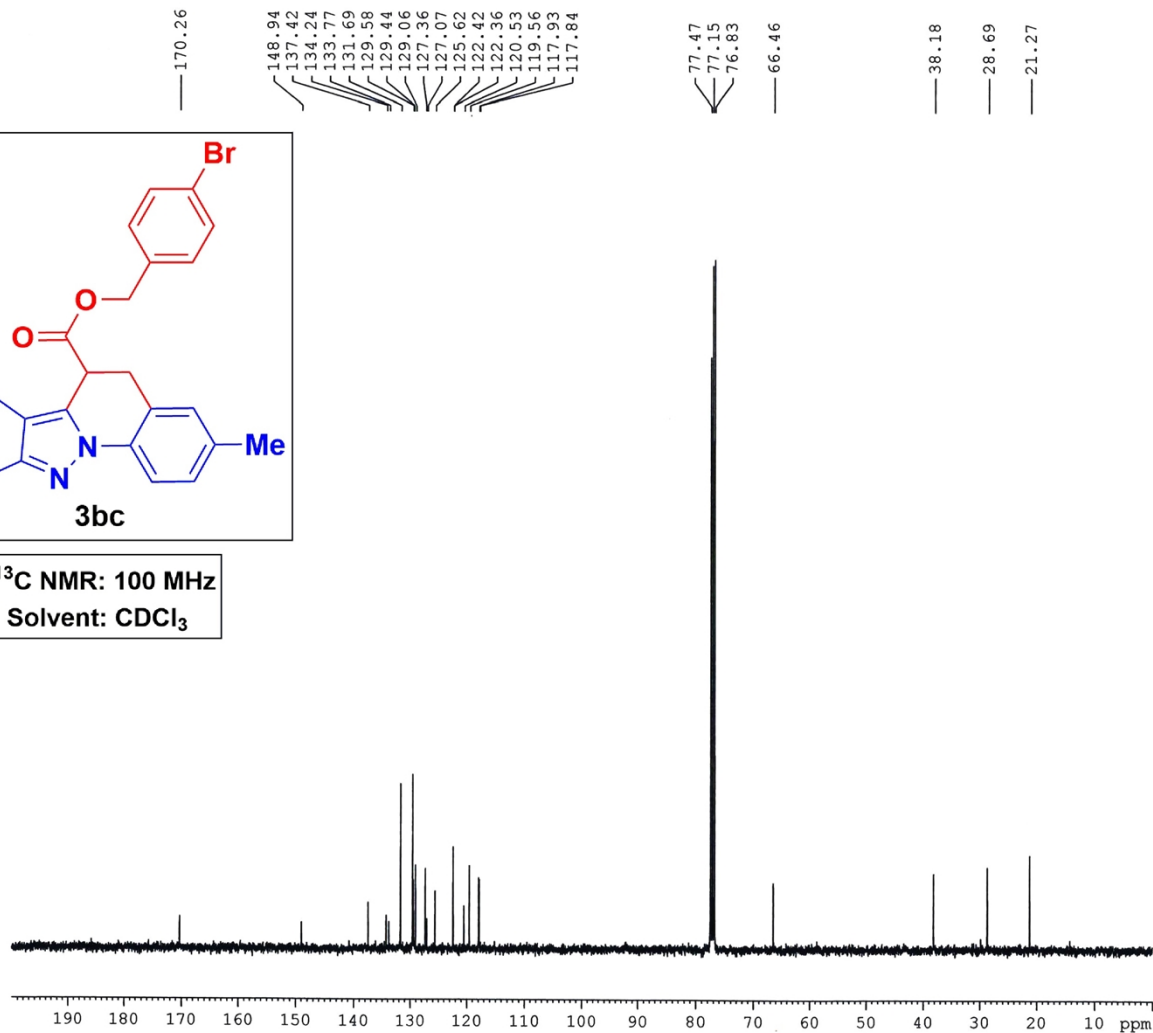

```

Current Data Parameters
NAME      Dr. A HAJRA-2024-13C
EXPNO    10
PROCNO    1

F2 - Acquisition Parameters
Date_     20240113
Time      11.21
INSTRUM   spect
PROBHD    5 mm PABBO BB/
PULPROG   zgpg30
TD         32768
SOLVENT   CDCl3
NS         620
DS         2
SWH        24038.461 Hz
FIDRES     0.733596 Hz
AQ         0.6815744 sec
RG         186.42
DW         20.800 usec
DE         6.50 usec
TE         291.9 K
D1         2.00000000 sec
D11        0.03000000 sec
TD0        1

===== CHANNEL f1 =====
SFO1      100.6278588 MHz
NUC1       13C
P1         8.90 usec
PLW1       54.00000000 W

===== CHANNEL f2 =====
SFO2      400.1516006 MHz
NUC2       1H
CPDPRG2    waltz16
PCPD2      90.00 usec
PLW2       12.00000000 W
PLW12      0.32231000 W
PLW13      0.16212000 W

F2 - Processing parameters
SI         16384
SF         100.6177873 MHz
WLB        EM
SSB        0
LB         1.00 Hz
GB         0
PC         1.40
  
```

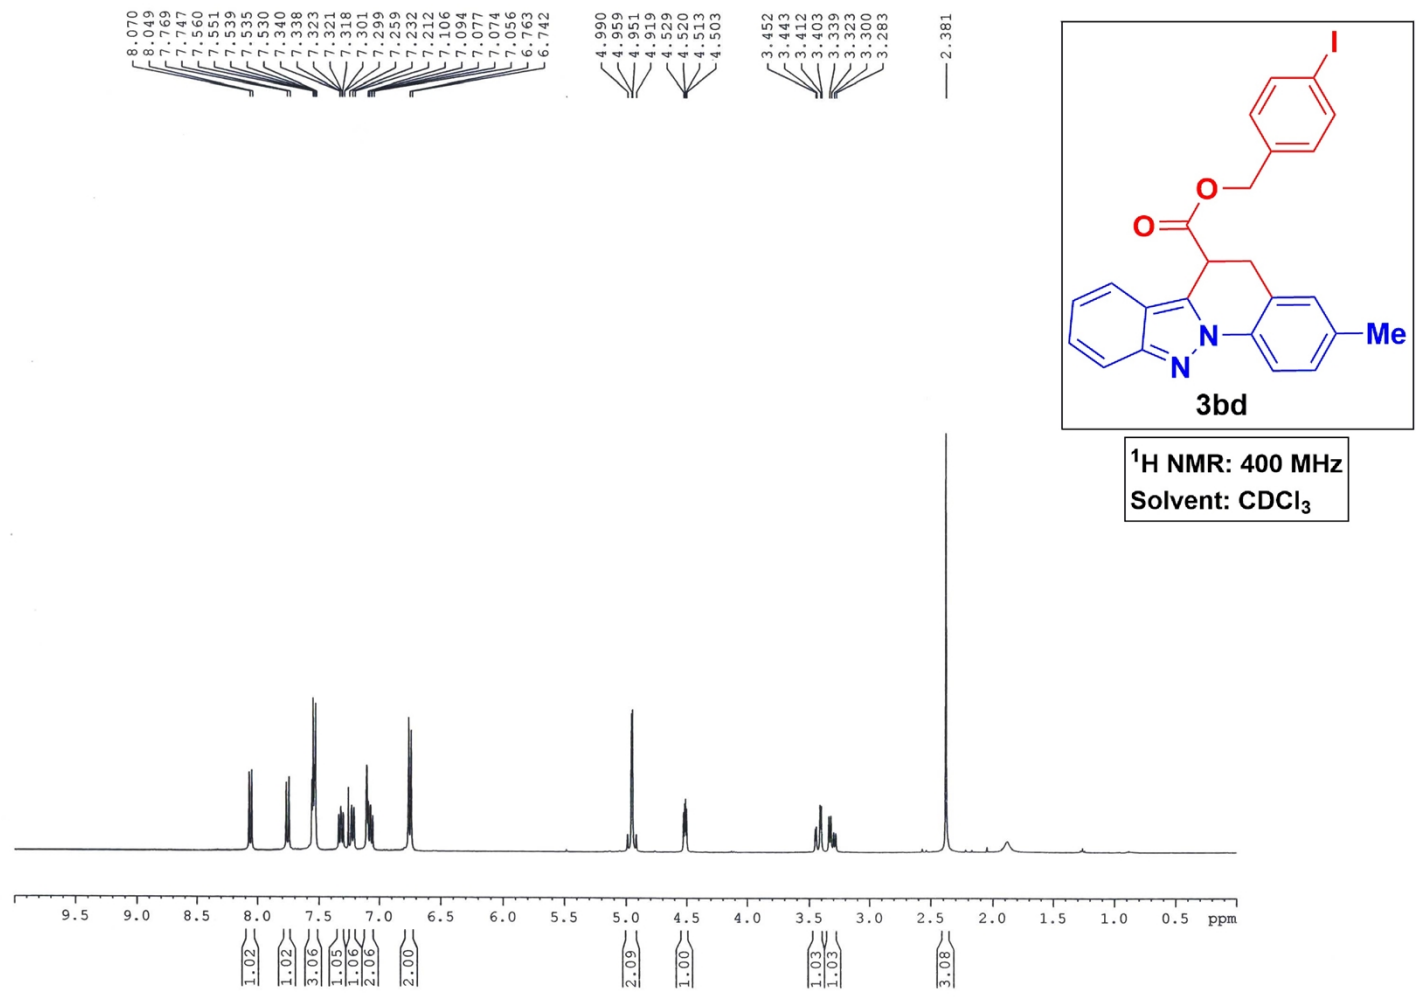

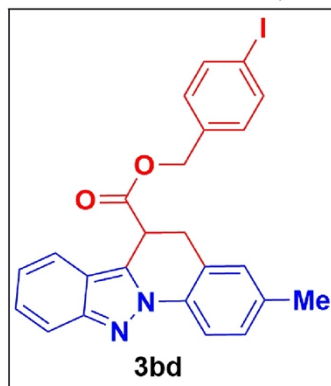

**<sup>13</sup>C NMR: 100 MHz**  
**Solvent: CDCl<sub>3</sub>**

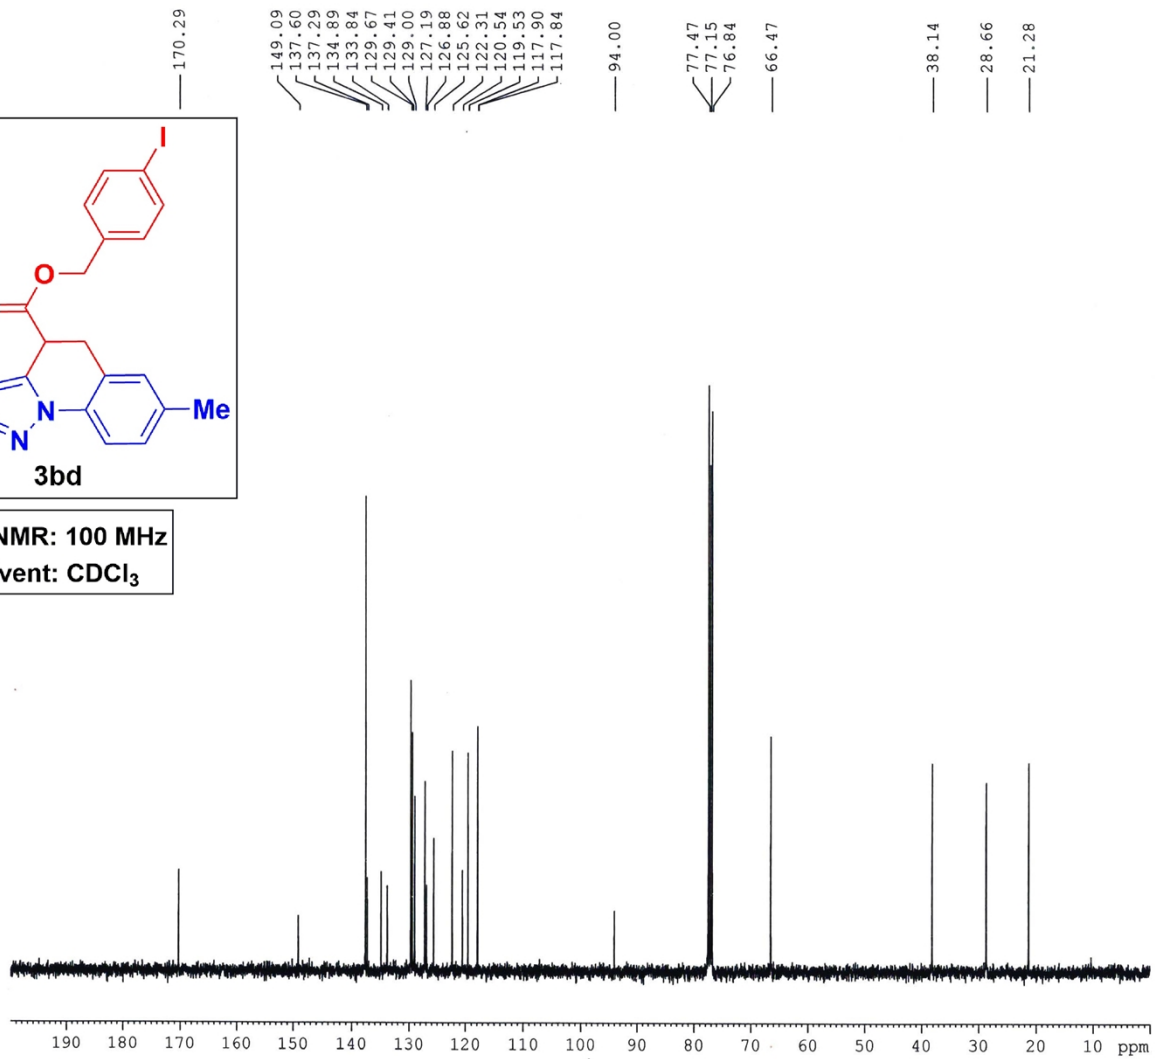

Current Data Parameters  
 NAME Dr. A HAJRA-2024-13C  
 EXPNO 17  
 PROCNO 1

F2 - Acquisition Parameters  
 Date\_ 20240124  
 Time 18.08  
 INSTRUM spect  
 FROBHD 5 mm PABBO BB/  
 PULPROG zgpg30  
 TD 32768  
 SOLVENT CDCl3  
 NS 200  
 DS 2  
 SWH 24038.461 Hz  
 FIDRES 0.733596 Hz  
 AQ 0.6815744 sec  
 RG 186.42  
 DW 20.800 usec  
 DE 6.50 usec  
 TE 290.1 K  
 D1 2.00000000 sec  
 D11 0.03000000 sec  
 TDO 1

----- CHANNEL f1 -----  
 SFO1 100.6278588 MHz  
 NUC1 13C  
 P1 8.90 usec  
 PLW1 54.00000000 W

----- CHANNEL f2 -----  
 SFO2 400.1516006 MHz  
 NUC2 1H  
 CPDPRG[2] waltz16  
 PCPD2 90.00 usec  
 PLW2 12.00000000 W  
 PLW12 0.32231000 W  
 PLW13 0.16212000 W

F2 - Processing parameters  
 SI 16384  
 SF 100.6177909 MHz  
 WDW EM  
 SSB 0  
 LB 1.00 Hz  
 GB 0  
 PC 1.40

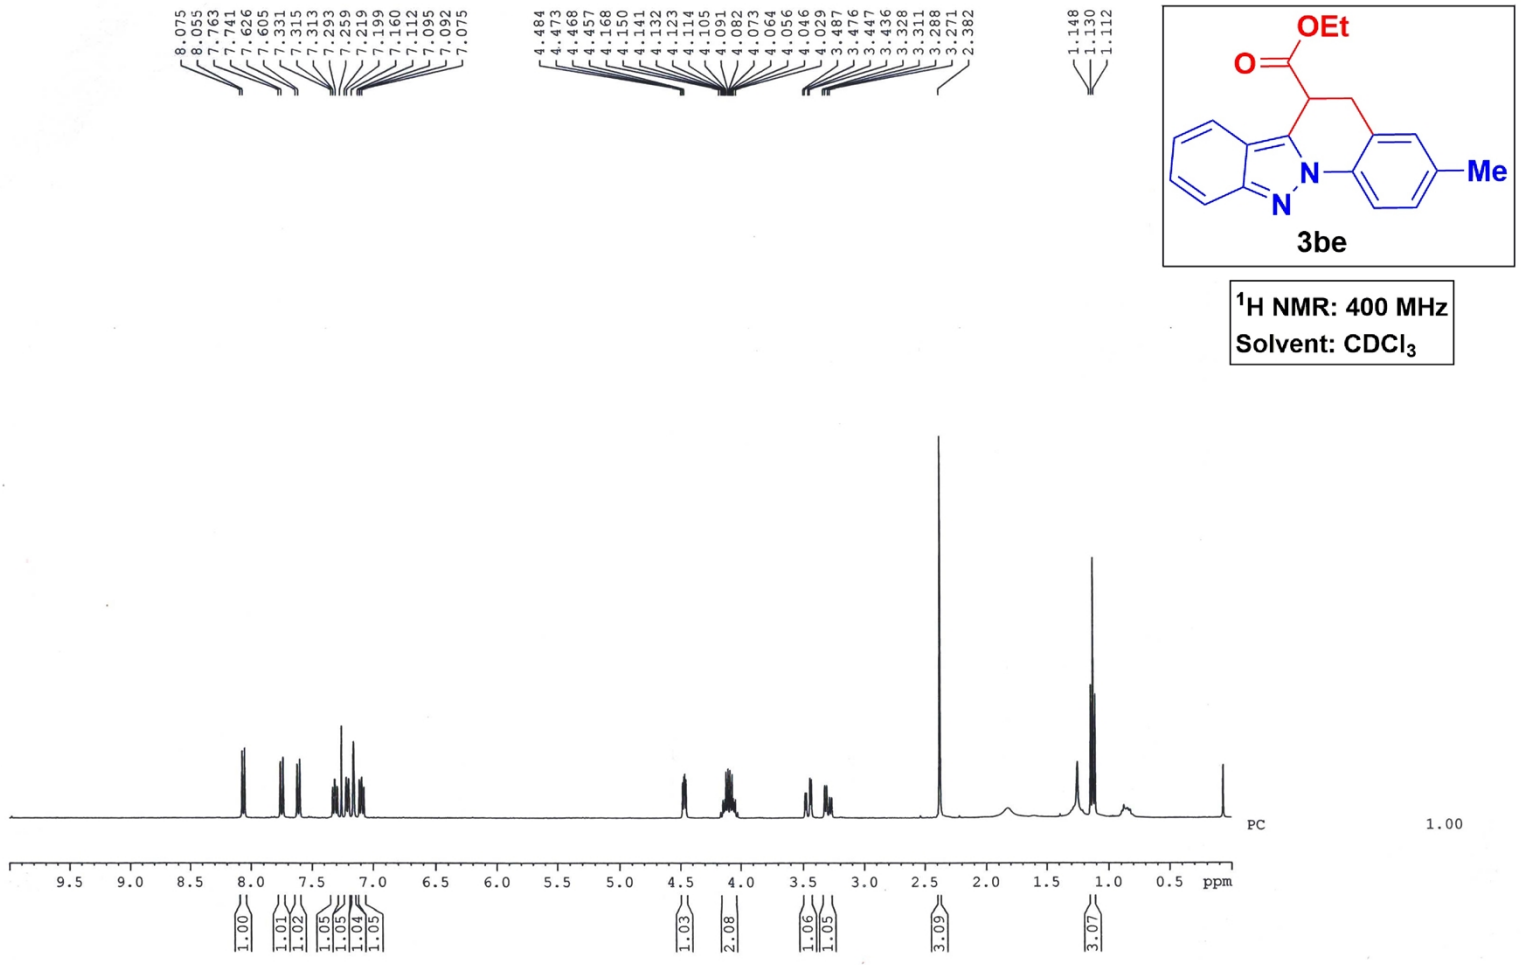

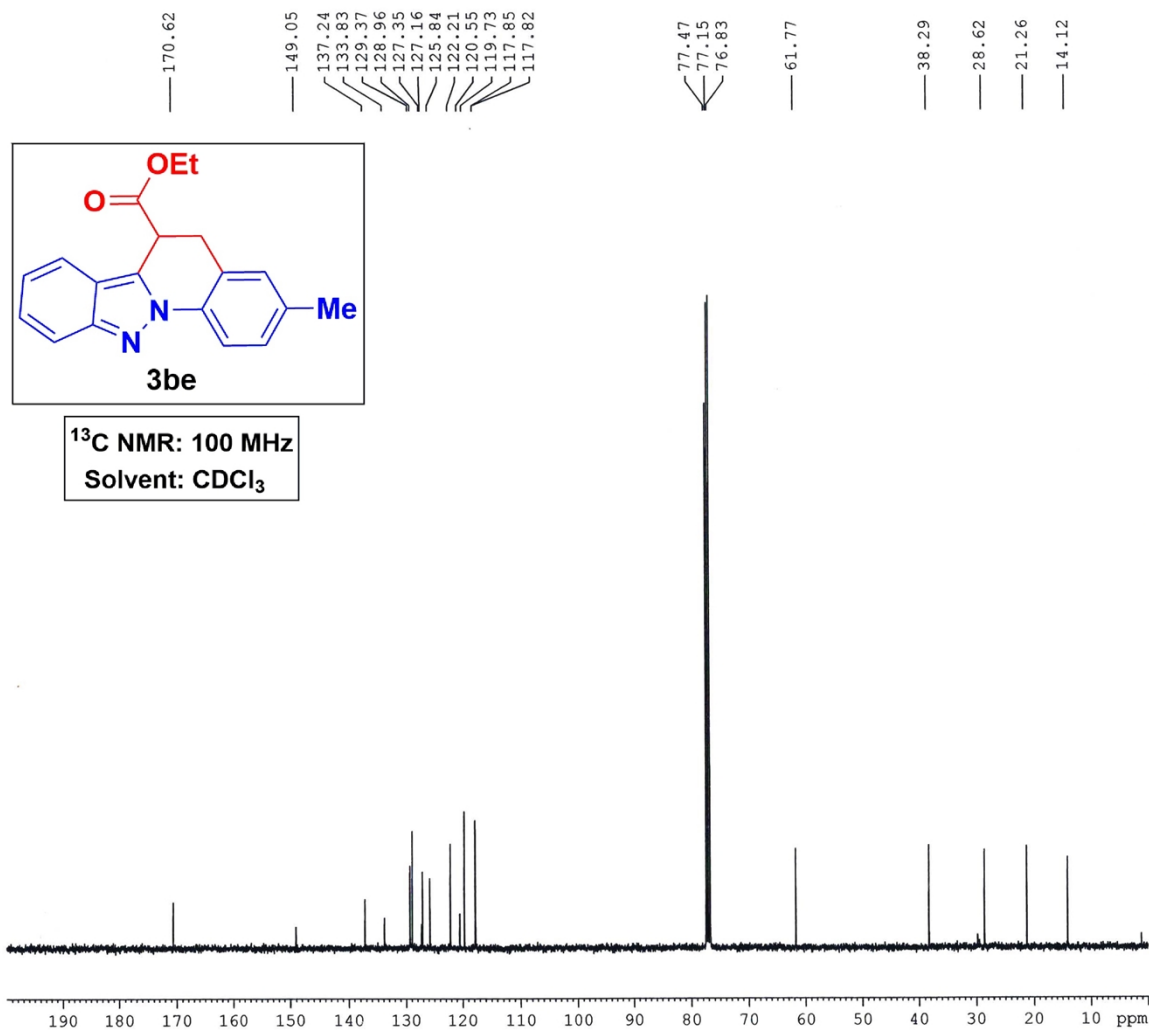



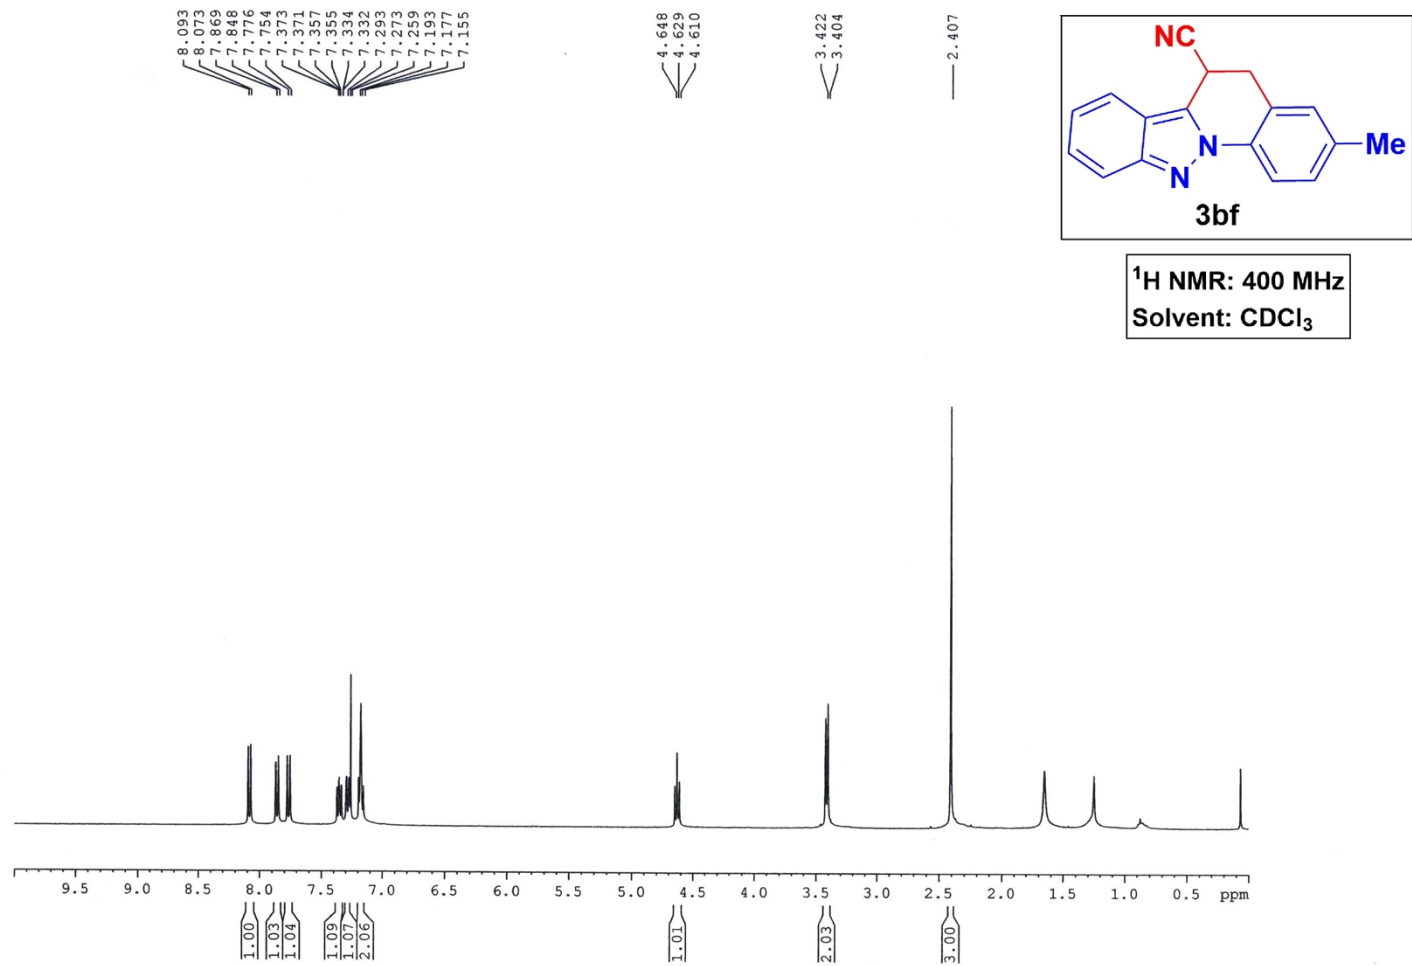

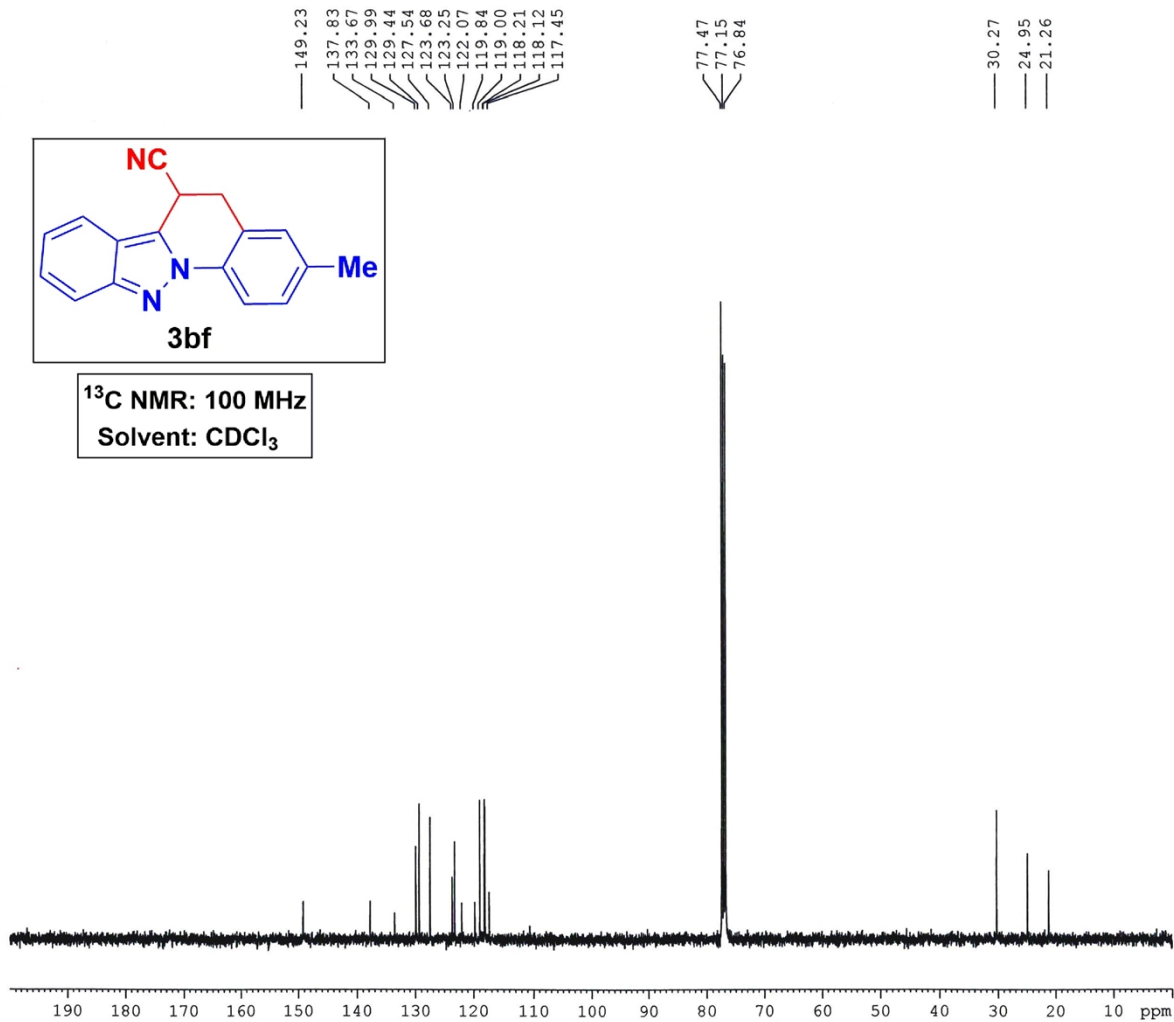

Current Data Parameters  
NAME Dr. A HAJRA-2024-13C  
EXPNO 15  
PROCNO 1

F2 - Acquisition Parameters  
Date\_ 20240122  
Time\_ 10.58  
INSTRUM spect  
PROBHD 5 mm PABBO BB/  
PULPROG zgpg30  
TD 32768  
SOLVENT CDCl3  
NS 480  
DS 2  
SWH 24038.461 Hz  
FIDRES 0.733596 Hz  
AQ 0.6815744 sec  
RG 186.42  
DW 20.800 usec  
DE 6.50 usec  
TE 290.1 K  
D1 2.0000000 sec  
D11 0.0300000 sec  
TDO 1

----- CHANNEL f1 -----  
SFO1 100.6278588 MHz  
NUC1 13C  
P1 8.90 usec  
PLW1 54.0000000 W

----- CHANNEL f2 -----  
SFO2 400.1516006 MHz  
NUC2 1H  
PCPD2 waltz16  
PCPD2 90.00 usec  
PLW2 12.0000000 W  
PLW12 0.32231000 W  
PLW13 0.16212000 W

F2 - Processing parameters  
SI 16384  
SF 100.6177877 MHz  
WDW EM  
SSB 0  
LB 1.00 Hz  
GB 0  
PC 1.40

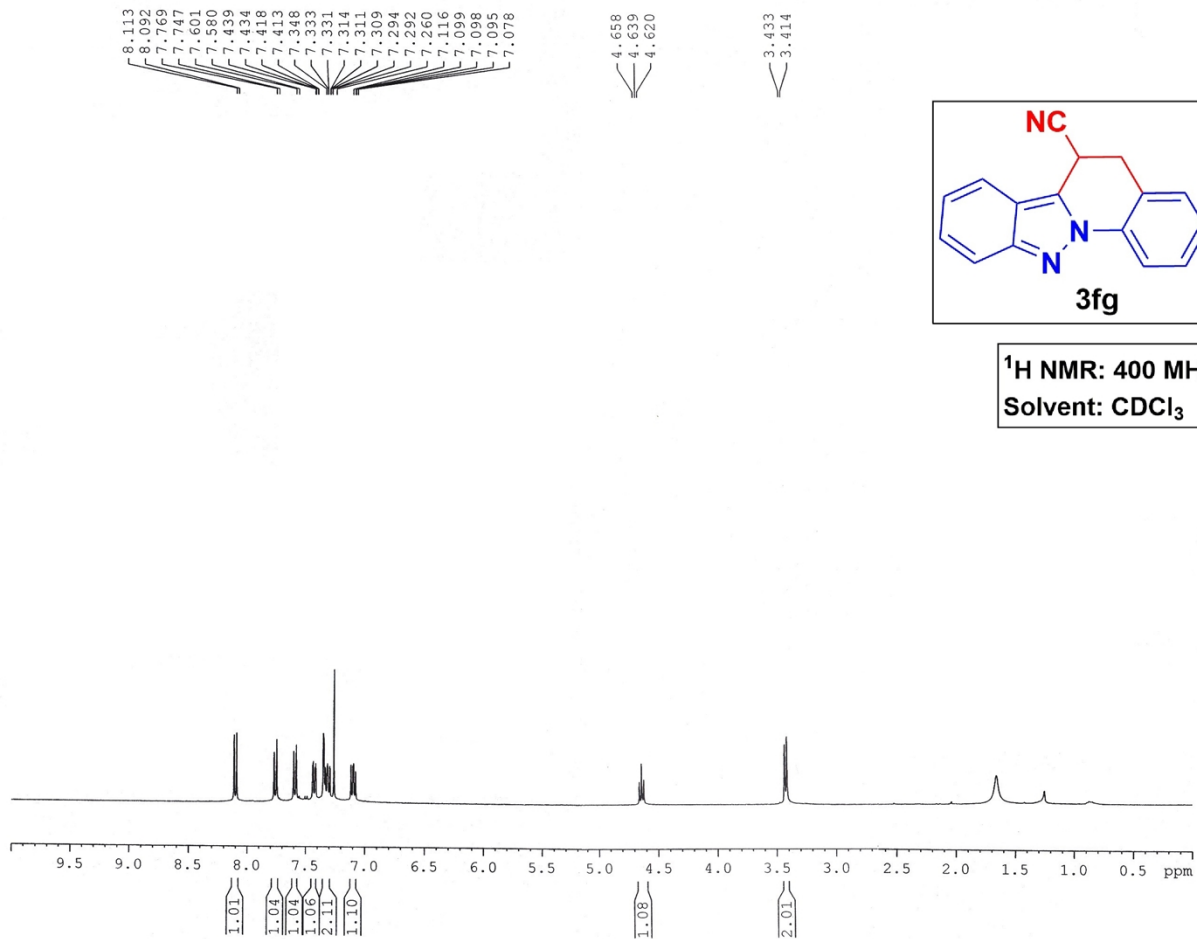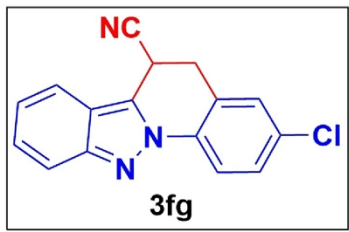

<sup>1</sup>H NMR: 400 MHz  
 Solvent: CDCl<sub>3</sub>

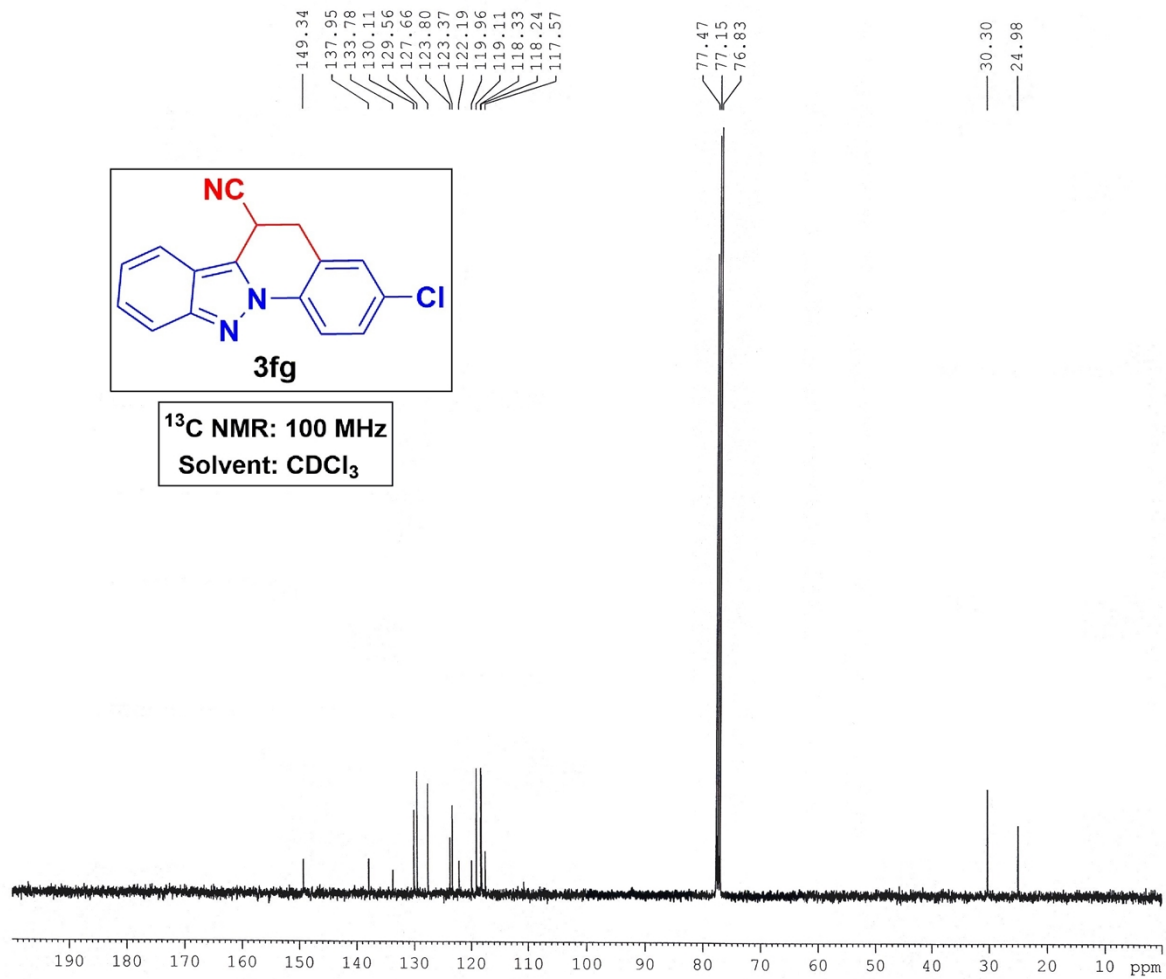

Current Data Parameters  
 NAME Dr. A HAJRA-2024-13C  
 EXPNO 237  
 PROCNO 1

F2 - Acquisition Parameters  
 Date\_ 20240816  
 Time 9.37  
 INSTRUM spect  
 PROBHD 5 mm PABBO BB/  
 PULPROG zgpg30  
 TD 32768  
 SOLVENT CDCl3  
 NS 510  
 DS 2  
 SWH 24038.461 Hz  
 FIDRES 0.733596 Hz  
 AQ 0.6815744 sec  
 RG 186.42  
 DW 20.800 usec  
 DE 6.50 usec  
 TE 298.1 K  
 D1 2.00000000 sec  
 D11 0.03000000 sec  
 TDO 1

----- CHANNEL f1 -----  
 SFO1 100.6278588 MHz  
 NUC1 13C  
 P1 8.90 usec  
 PLW1 54.00000000 W

----- CHANNEL f2 -----  
 SFO2 400.1516006 MHz  
 NUC2 1H  
 CPDPRG[2] waltz16  
 PCPD2 90.00 usec  
 PLW2 12.00000000 W  
 PLW12 0.32231000 W  
 PLW13 0.16212000 W

F2 - Processing parameters  
 SI 16384  
 SF 100.6177844 MHz  
 WDW EM  
 SSB 0  
 LB 1.00 Hz  
 GB 0  
 PC 1.40

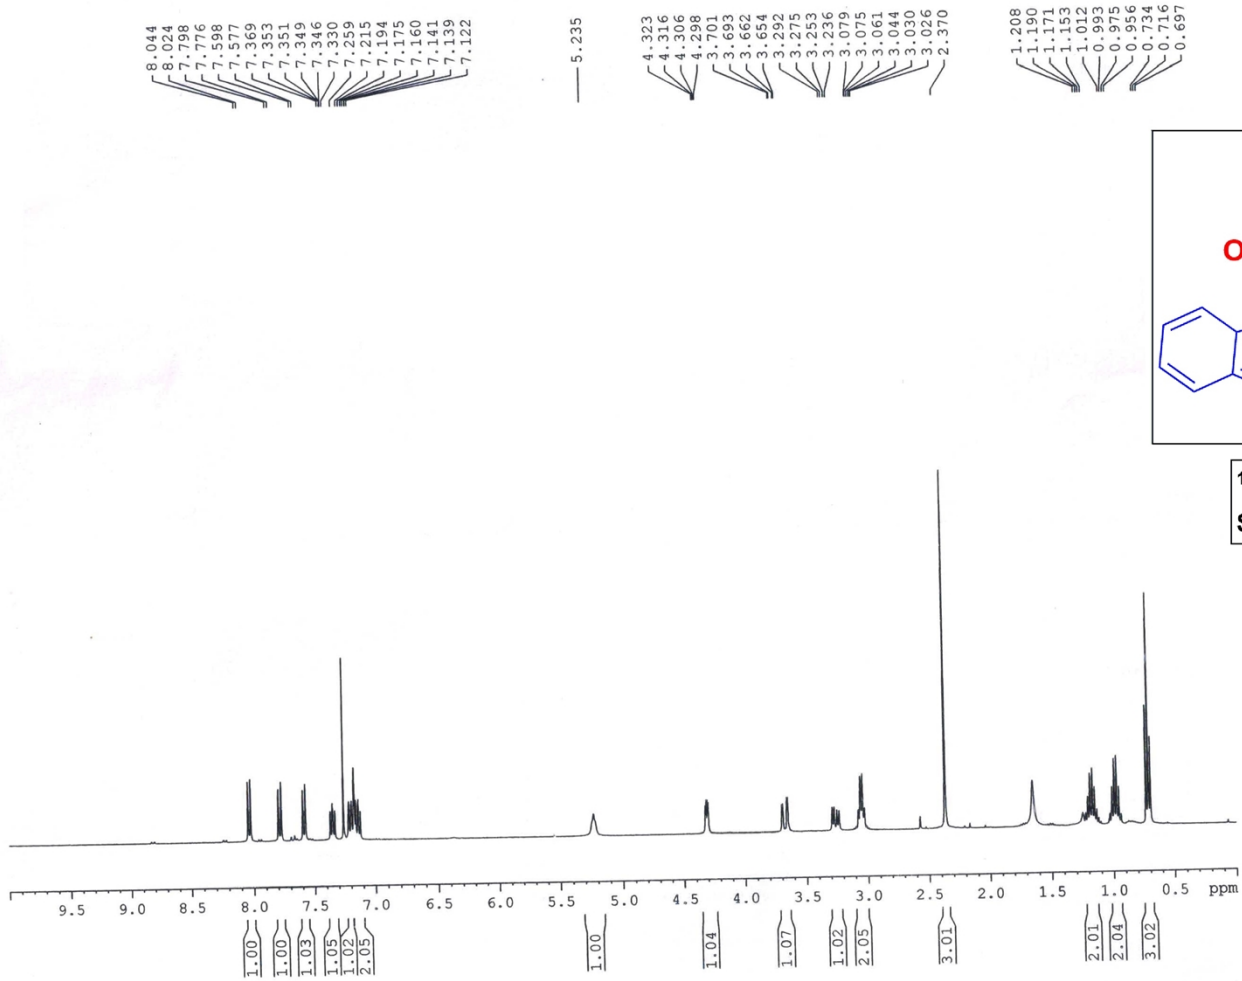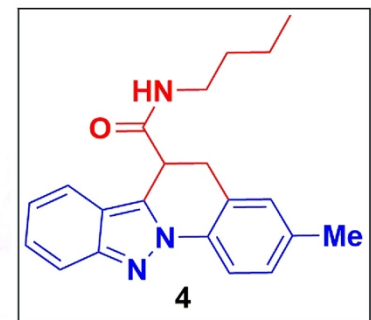

**<sup>1</sup>H NMR: 400 MHz**  
**Solvent: CDCl<sub>3</sub>**

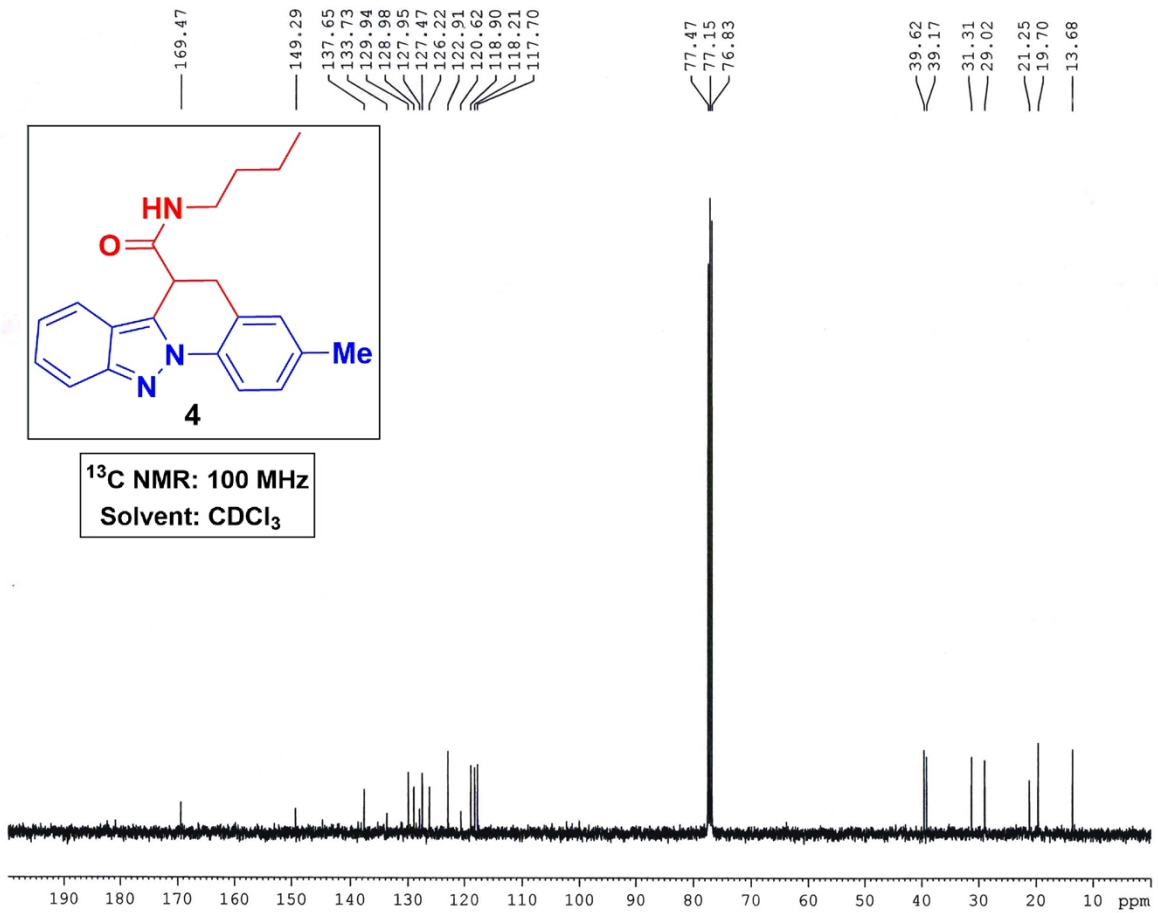

Current Data Parameters  
 NAME Dr. A HAJRA-2024-13C  
 EXPNO 58  
 PROCNO 1

F2 - Acquisition Parameters  
 Date 20240308  
 Time 11.12  
 INSTRUM spect  
 PROBHD 5 mm PABBO BB/  
 PULPROG zgpg30  
 TD 32768  
 SOLVENT CDCl3  
 NS 320  
 DS 2  
 SWH 24038.461 Hz  
 FIDRES 0.733596 Hz  
 AQ 0.6815744 sec  
 RG 186.42  
 DW 20.800 usec  
 DE 6.50 usec  
 TE 294.6 K  
 D1 2.00000000 sec  
 D11 0.03000000 sec  
 TD0 1

----- CHANNEL f1 -----  
 SFO1 100.6278568 MHz  
 NUC1 13C  
 P1 8.90 usec  
 PLW1 54.00000000 W

----- CHANNEL f2 -----  
 SFO2 400.1516006 MHz  
 NUC2 1H  
 CPDPRG2 waltz16  
 PCPD2 90.00 usec  
 PLW2 12.00000000 W  
 PLW12 0.32231000 W  
 PLW13 0.16212000 W

F2 - Processing parameters  
 SI 16384  
 SF 100.6177858 MHz  
 WDW EM  
 SSB 0  
 LB 1.00 Hz  
 GB 0  
 PC 1.40

8.058  
8.037  
7.678  
7.656  
7.647  
7.625  
7.342  
7.337  
7.320  
7.315  
7.309  
7.291  
7.271  
7.260  
7.079  
7.061  
7.059  
7.042

3.831  
3.820  
3.812  
3.805  
3.796  
3.791  
3.787  
3.780  
3.768  
3.764  
3.761  
3.743  
3.729  
3.256  
3.245  
3.215  
3.204  
3.168  
3.163  
3.128  
3.123

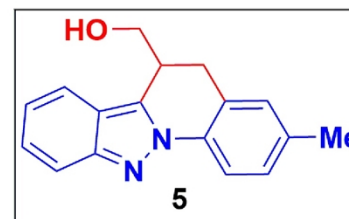

<sup>1</sup>H NMR: 400 MHz  
Solvent: CDCl<sub>3</sub>

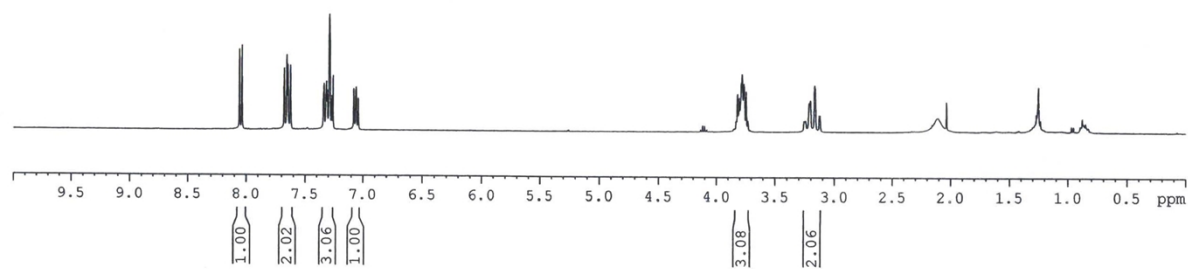

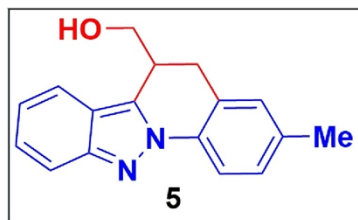

**<sup>13</sup>C NMR: 100 MHz**  
**Solvent: CDCl<sub>3</sub>**

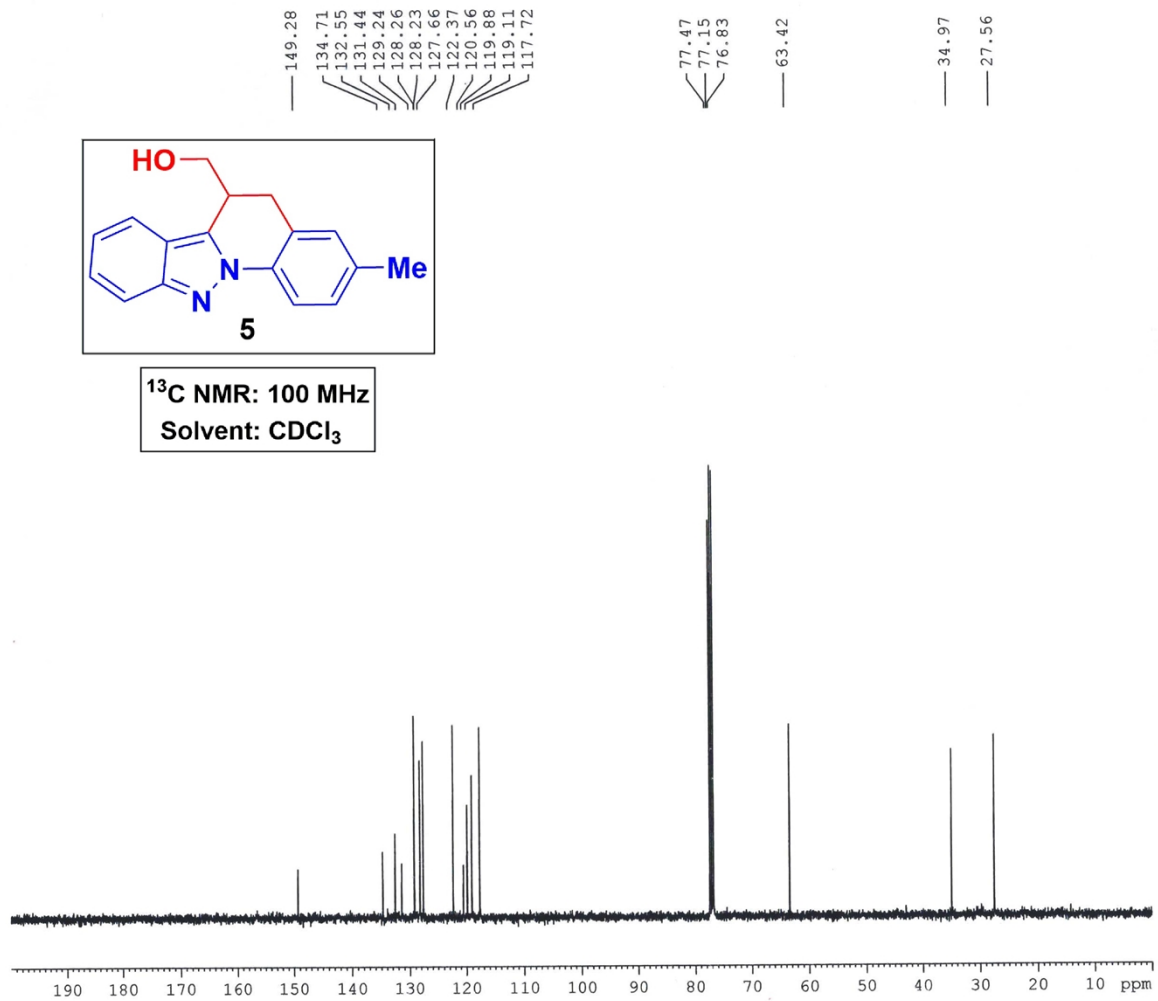

```

Current Data Parameters
NAME      Dr. A HAJRA-2024-13C
EXPNO    62
PROCNO   1

F2 - Acquisition Parameters
Date_    20240313
Time     17.58
INSTRUM  spect
PROBHD   5 mm PABBO BB/
PULPROG  zgpg30
TD       32768
SOLVENT  CDCl3
NS       280
DS       2
SWH      24038.461 Hz
FIDRES   0.733596 Hz
AQ       0.6815744 sec
RG       186.42
DW       20.800 usec
DE       6.50 usec
TE       295.5 K
D1       2.0000000 sec
D11      0.0300000 sec
TD0      1

===== CHANNEL f1 =====
SFO1     100.6278588 MHz
NUC1      13C
P1       8.90 usec
PLW1     54.0000000 W

===== CHANNEL f2 =====
SFO2     400.1516006 MHz
NUC2      1H
CPDPRG[2] waltz16
PCPD2    90.00 usec
PLW2     12.0000000 W
PLW12    0.32231000 W
PLW13    0.16212000 W

F2 - Processing parameters
SI       16384
SF       100.6177873 MHz
WDW      EM
SSB      0
LB       1.00 Hz
GB       0
PC       1.40

```
